# Supplementary material
Source: PubMed Central journal article supplement (PMC3970908)
Supplement: NIHMS413926-supplement-Supporting_Information.pdf [file NIHMS413926-supplement-Supporting_Information.pdf]

## Synthetic Methods

**General Considerations.** Unless otherwise specified, all manipulations were performed under an inert atmosphere by standard Schlenk techniques or in an M. Braun Unilab N<sub>2</sub>-filled glove box maintained at or below 1 ppm of O<sub>2</sub> and H<sub>2</sub>O. Glassware was dried at 150 °C overnight. <sup>1</sup>H NMR and <sup>13</sup>C NMR spectra were recorded on a Bruker Avance 500 MHz spectrometer at room temperature. Shifts (δ) are reported in ppm, relative to residual protiated solvent in C<sub>6</sub>D<sub>6</sub> (δ 7.15 ppm, 128.06 ppm), CDCl<sub>3</sub> (δ 7.26 ppm, 77.23 ppm) or THF-*d*<sub>8</sub> (δ 1.73, 3.58 ppm). Peaks were singlets unless otherwise noted. Solution magnetic susceptibilities were determined by Evans' method.<sup>1,2</sup> NMR assignments are based on the labels shown in Figure S-1.

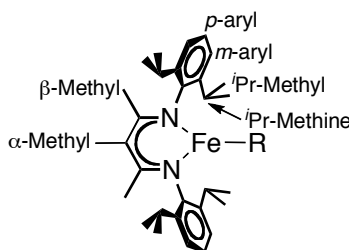

**Figure S-1.** A general iron complex with the  $\beta$ -diketiminato ligand (<sup>Me</sup>L<sup>Me</sup>) labeled to clarify NMR assignments below.

Pentane, diethyl ether, THF (tetrahydrofuran) and toluene were purified by passage through activated alumina and “deoxygenizer” columns from Glass Contour Co. (Laguna Beach, CA). THF was further dried by distilling from Na/benzophenone. Deuterated benzene was first dried over activated alumina and then filtered before use. THF-*d*<sub>8</sub> was dried over CaH<sub>2</sub> and then

over Na/benzophenone and vacuum transferred to a storage container before use. Celite was dried at 200 °C under vacuum overnight.

Infrared data were obtained on a Shimadzu FT-IR 8400S spectrometer using KBr pellets or as a neat solid. Frequencies are given in  $\text{cm}^{-1}$ . Electrochemical data were obtained using a Cypress Systems 3100 potentiostat. The working electrode was glassy carbon with a 1 mm diameter working area and Ag wires were used as auxiliary and reference electrodes. All spectra were taken using a 50 mM  $[\text{NBu}_4][\text{BAR}^{\text{F}}_4]$  ( $\text{Ar}^{\text{F}} = 3,5\text{-bis}-(\text{CF}_3\text{Ph})_4\text{B}$ ) electrolyte solution in  $\text{Et}_2\text{O}$  or THF. The scan rate was 200 mV/s unless otherwise noted. Differential pulse experiments used a sweep width height of 500 mV, step height of 2 or 4 mV and a sweep width period of 20 mS. All measurements were referenced to the  $\text{Cp}_2\text{Fe}^+/\text{Cp}_2\text{Fe}$  couple using an internal ferrocene standard. Electronic spectra were recorded between 400 and 1000 nm on a Cary 50 UV-visible spectrophotometer, using airfree cuvettes of 0.1 cm optical path length. Extinction coefficients are given in  $\text{mM}^{-1} \text{cm}^{-1}$ . Elemental analyses were performed by University of Illinois (Urbana, Illinois) or Columbia Analytical Services (Tucson, AZ) and the CENTC Elemental Analysis Facility at the University of Rochester. Mass spectrometry analyses used electrospray ionization, and were done on a Shimadzu QP2010 LCMS.

$\text{KC}_8$  was prepared by heating potassium and graphite at 150 °C under an argon atmosphere. Benzylpotassium was made using a published synthesis.<sup>3</sup>  $\text{HL}^{\text{Me}}$  was synthesized using a published method<sup>4,5</sup> followed by deprotonation with benzylpotassium<sup>3</sup> in  $\text{Et}_2\text{O}$ .  $\text{FeCl}_2(\text{THF})_{1.5}$  was made as previously published.<sup>6</sup>  $\text{L}^{\text{Me}}\text{Fe}^i\text{Bu}$  was also synthesized through a published procedure.<sup>7</sup>  $\text{Me}_3\text{PS}$  was synthesized using a modified published synthesis in which

PMe<sub>3</sub> was stirred with 1/8 molar equivalents of S<sub>8</sub> in toluene for 12 hours.<sup>8</sup> Na[BAr<sup>F</sup><sub>4</sub>]<sup>9</sup> was made using a published procedure.<sup>9,10</sup> KOTf (OTf = CF<sub>3</sub>SO<sub>3</sub><sup>-</sup>) was purchased from Aldrich and dried at 100 °C under vacuum overnight before use.

**H<sup>Me</sup>L<sup>Me</sup>**. Under an N<sub>2</sub> atmosphere, MeI (3.6 mL, 57.7 mmol) was added by syringe to a cooled yellow solution (-78 °C) of KL<sup>Me</sup> (24.0 g, 52.5 mmol) in Et<sub>2</sub>O (70 mL). The solution was warmed to room temperature over 1 hour and it turned cloudy and white. The mixture was stirred at room temperature for 1 hour and then exposed to air and dried under vacuum. The light-yellow product was extracted using Et<sub>2</sub>O (3 x 50 mL) from water (50 mL) and dried over MgSO<sub>4</sub>. The solution was put under vacuum until it became a tan oil. In the glove box, the oil was redissolved in dry Et<sub>2</sub>O (80 mL) and stored over activated 4Å molecular sieves (3 x 12 hrs). The solution was concentrated to 60 mL and cooled to -35 °C to give a white solid (17.8 g, 41.0 mmol, 78%). The kinetic product was the diimine tautomer and significant conversion to the thermodynamic product, the enamine/imine tautomer, was seen in about a week when left out in air. **Diimine tautomer:** <sup>1</sup>H NMR (500 MHz, CDCl<sub>3</sub>) δ 7.3 (d, 4H, *m*-aryl), 7.2 (t, 2H, *p*-aryl), 3.9 (q, *J* = 7 Hz, 1H, α-H), 2.8 (sept., *J* = 7 Hz, 4H, <sup>*i*</sup>Pr-methine), 1.9 (s, 6H, β-methyl), 1.7 (d, *J* = 7 Hz, 3H, α-methyl), 1.3 (2x overlapping doublet, 24H, <sup>*i*</sup>Pr-methyl) ppm. <sup>13</sup>C NMR (500 MHz, CDCl<sub>3</sub>) δ 171.3 (β-C), 146.3 (*i*-C), 136.4 (*o*-C), 123.6 (*p*-Ar), 123.2 (*m*-C), 123.1 (*m*-C), 56.0 (α-C), 28.2 (<sup>*i*</sup>Pr-CH), 28.1 (<sup>*i*</sup>Pr-CH), 23.7 (<sup>*i*</sup>Pr-methyl), 23.5 (<sup>*i*</sup>Pr-methyl), 23.3 (<sup>*i*</sup>Pr-methyl), 23.2 (<sup>*i*</sup>Pr-methyl), 19.3 (β-methyl), 15.7 (α-methyl) ppm. MS (EI<sup>+</sup>): *m/z* (relative intensity): 433 (100%), 434 (32%), 435 (6%). Anal. Calcd for C<sub>30</sub>H<sub>44</sub>N<sub>2</sub>: C, 83.28, H, 10.25, N, 6.47. Found: C, 83.28, H, 10.34, N, 6.47. IR (neat, cm<sup>-1</sup>): 3058 (w), 3021 (w), 2959 (s), 2868 (m), 1662 (s), 1590 (w), 1445 (s), 1363 (m), 1356

(m), 1328 (w), 1279 (w), 1251 (w), 1172 (m), 1109 (w), 1075 (w). **Enamine/Imine Tautomer:**

Only NMR signals that are distinctive for this isomer are listed.  $^1\text{H}$  NMR (500 MHz,  $\text{CDCl}_3$ )  $\delta$  13.5 (s, 1H, NH), 3.2 ( $J = 7$ , sept., 4H,  $i$ Pr-methine), 2.1 (s, 3H,  $\alpha$ -methyl), 1.9 (s,  $\beta$ -methyl), 1.3 ( $J = 7$ , d,  $i$ Pr-methyl), 1.2 ( $J = 7$ , d,  $i$ Pr-methyl) ppm.  $^{13}\text{C}$  NMR (500 MHz,  $\text{CDCl}_3$ )  $\delta$  161.1 ( $\beta$ -C), 142.38 ( $i$ -C), 141.3 ( $o$ -C), 124.9 ( $p$ -Ar), 123.2 ( $m$ -C), 95.1 ( $\alpha$ -C), 28.3 ( $i$ Pr-CH), 24.3 ( $i$ Pr-methyl), 23.6 ( $i$ Pr-methyl), 18.9 ( $\beta$ -methyl), 16.0 ( $\alpha$ -methyl) ppm. MS ( $\text{EI}^+$ )  $m/z$  (relative intensity): 433 (100%), 434 (32%), 435 (6%).

**$\text{K}^{\text{Me}}\text{L}^{\text{Me}} \cdot \text{Et}_2\text{O}$ .** Benzylpotassium<sup>3</sup> (5.24 g, 40.2 mmol) was added to a cooled solution ( $-78\text{ }^\circ\text{C}$ ) of  $\text{H}^{\text{Me}}\text{L}^{\text{Me}}$  (15.9 g, 36.7 mmol) in  $\text{Et}_2\text{O}$  (60 mL). The mixture was allowed to warm to room temperature over 3 hours. The reaction mixture was filtered through Celite and dried under vacuum. The yellow solids were dissolved in  $\text{Et}_2\text{O}$  (~40 mL) and cooled to  $-35\text{ }^\circ\text{C}$  to yield crystals (12.3 g, 26.1 mmol, 71%).  $^1\text{H}$  NMR (500 MHz,  $\text{C}_6\text{D}_6$ )  $\delta$  7.1 (d,  $J = 8$  Hz, 4H,  $m$ -aryl), 7.0 (t,  $J = 8$  Hz, 2H,  $p$ -aryl), 3.3 (sept.,  $J = 7$  Hz, 4H,  $i$ Pr-methine), 3.2 (q,  $J = 7$  Hz, 4H,  $\text{Et}_2\text{O}$ ), 2.3 (s, 3H,  $\alpha$ -methyl), 2.0 (s, 6H,  $\beta$ -methyl), 1.2 (d,  $J = 7$  Hz, 12H,  $i$ Pr-methyl), 1.1 (t,  $J = 7$  Hz, 6H,  $\text{Et}_2\text{O}$ ) 1.0 (d,  $J = 7$  Hz, 12H,  $i$ Pr-methyl) ppm.  $^{13}\text{C}$  NMR (500 MHz,  $\text{C}_6\text{D}_6$ )  $\delta$  159.9 ( $\beta$ -C), 151.0 ( $i$ -C), 139.5 ( $o$ -C), 123.8 ( $m$ -C), 120.5 ( $p$ -C), 91.4 ( $\alpha$ -C), 65.9 ( $\text{Et}_2\text{O}$ ), 27.6 ( $i$ Pr-methine), 24.3 ( $i$ Pr-methyl), 24.2 ( $i$ Pr-methyl), 22.4 ( $\beta$ -methyl), 19.0 ( $\alpha$ -methyl), 15.5 ( $\text{Et}_2\text{O}$ ) ppm. Anal. Calcd for  $\text{C}_{34}\text{H}_{53}\text{KN}_2\text{O}$ : C, 74.94, H, 9.80, N, 5.14. Found: C, 75.16, H, 9.80, N, 5.09. IR (KBr,  $\text{cm}^{-1}$ ): 3054 (w), 2959 (s), 2919 (m), 2867 (m), 1559 (m), 1456 (s), 1383 (s), 1307 (s), 1226 (m), 1181 (m), 1097 (m), 1058 (w), 981 (m), 935 (w), 818 (w), 774 (m), 706(w).

**[<sup>Me</sup>L<sup>Me</sup>FeCl]<sub>2</sub> · K<sup>Me</sup>L<sup>Me</sup> · Et<sub>2</sub>O** (1.3 g, 2.4 mmol) was mixed with FeCl<sub>2</sub>(THF)<sub>1.5</sub> (0.56 g, 2.4 mmol) in toluene (150 mL) at 100 °C overnight. The dark red solution was filtered through a fritted funnel. The filtrate was collected, concentrated and cooled to -35 °C to yield red crystals (0.74 g, 0.71 mmol, 59%). <sup>1</sup>H NMR (500 MHz, C<sub>6</sub>D<sub>6</sub>) δ 188 (6H, α-methyl), 11.1 (24H, <sup>i</sup>Pr-methyl), 8.9 (8H), -25.9 (8H), -34.2 (12H, β-methyl), -37.4 (24H, <sup>i</sup>Pr-methyl), -54.1 (4H, *p*-aryl) ppm. 8H resonances could be the <sup>i</sup>Pr-methine protons or the *m*-aryl protons. Anal. Calcd for C<sub>60</sub>H<sub>86</sub>Cl<sub>2</sub>Fe<sub>2</sub>N<sub>4</sub>: C, 68.90, H, 8.29, N, 5.36. Found: C, 68.87, H, 8.57, N, 5.21. UV-Vis (mM<sup>-1</sup> cm<sup>-1</sup>): 342(32), 539(0.3). μ<sub>eff</sub> (Evans, THF-*d*<sub>8</sub>): 5.3(4) μ<sub>B</sub>. IR (KBr, cm<sup>-1</sup>): 3057 (w), 2965 (s), 2926 (m), 2867 (m), 1521 (s), 1472 (s), 1462 (s), 1437 (s), 1419 (s), 1383 (m), 1364 (m), 1332 (s), 1312 (s), 1254 (m), 1239 (m), 1205 (w), 1180 (m), 1161 (w), 1132 (w), 1100 (w), 1076 (w), 1056 (w), 1039 (w), 989 (m), 935 (w), 864 (w), 802 (w), 780 (m), 728 (w).

**<sup>Me</sup>L<sup>Me</sup>Fe<sup>*i*</sup>Bu**. An analogous synthesis to L<sup>Me</sup>Fe<sup>*i*</sup>Bu<sup>7</sup> was used substituting K<sup>Me</sup>L<sup>Me</sup> for KL<sup>Me</sup>. Additionally, 10 drops of 1,4 dioxane was added to the pentane crude reaction mixture before filtering. The reaction mixture was filtered twice through Celite (Yield 63%). <sup>1</sup>H NMR (500 MHz, C<sub>6</sub>D<sub>6</sub>) δ 193 (3H, α-methyl), 106 (6H, <sup>i</sup>Bu-methyl), 44.6 (6H, β-methyl), -10.7 (4H), -15.3 (12H, <sup>i</sup>Pr-methyl), -90.6 (2H, *p*-aryl), -110 (12H, <sup>i</sup>Pr-methyl), -137 (4H) ppm. 4H resonances could be the <sup>i</sup>Pr-methine protons or the *m*-aryl protons. The methylene group is close to the paramagnetic iron center so may be too broad to observe. The <sup>1</sup>H NMR spectrum closely resembled that of L<sup>Me</sup>Fe<sup>*i*</sup>Bu.<sup>7</sup> μ<sub>eff</sub> (Evans, C<sub>6</sub>D<sub>6</sub>): 5.7(3) μ<sub>B</sub>. UV-Vis (mM<sup>-1</sup> cm<sup>-1</sup>): 300(13), 345(17), 398(10), 529(0.65). Anal. Calcd for C<sub>34</sub>H<sub>52</sub>FeN<sub>2</sub>: C, 74.98, H, 9.62, N, 5.14. Found: C, 75.36, H, 9.90, N, 5.10. IR (KBr, cm<sup>-1</sup>): 1529 (m), 1471 (w), 1457 (m), 1435 (m), 1424 (m), 1382 (w), 1367 (m), 1337 (s), 1314 (s),

1255 (w), 1240 (w), 1181 (w), 1159 (w), 1135 (w), 1099 (w), 1055 (w), 1041 (w), 994 (m), 935 (w), 866 (w), 809 (w), 794 (w), 784 (m), 757 (w), 734 (w), 704 (w), 668 (m), 643 (w), 618 (w), 562 (w).

**Modified Synthesis and Characterization of  $[\text{L}^{\text{Me}}\text{Fe}]_2(\mu\text{-S})$  (**1-H**).**  $\text{L}^{\text{Me}}\text{Fe}^i\text{Bu}$  (189.8 mg, 0.340 mmol) was mixed with  $\text{Me}_3\text{PS}$  (18.4 mg, 0.170 mmol) in toluene (20 mL) at 100 °C overnight. The volatile materials were evaporated. The solids were dissolved in pentane (20 mL) and filtered through Celite. The dark red filtrate was concentrated to 4 mL and cooled to -35 °C to yield crystals (108.9 mg, 0.111 mmol, 65%). **1-H** (58.0 mg, 59.2  $\mu\text{mol}$ ) was dissolved in pentane (2 mL) and THF (0.5 mL) to form (**1-H**)(THF).  $^1\text{H}$  NMR (500 MHz,  $\text{THF-}d_8$ )  $\delta$  9.6 (8H), 1.6 (24H,  $^i\text{Pr}$ -methyl), -2.3 (8H), -6.7 (4H,  $p$ -aryl), -7.4 (12H,  $\beta$ -methyl), -10.0 (24H,  $^i\text{Pr}$ -methyl) ppm. A peak for the  $\alpha$ -H was not seen, most likely due to broadening or overlap. 8H resonances could be the  $^i\text{Pr}$ -methine protons or the  $m$ -aryl protons. This compound has been fully characterized in a previous publication,<sup>13</sup> and the  $^1\text{H}$  NMR spectrum matches.

**$[\text{L}^{\text{Me}}\text{L}^{\text{Me}}\text{Fe}]_2(\mu\text{-S})$  (**1-Me**).** An analogous synthesis to (**1-H**) was used substituting  $^{\text{Me}}\text{L}^{\text{Me}}\text{Fe}^i\text{Bu}$  for  $\text{L}^{\text{Me}}\text{Fe}^i\text{Bu}$  (Yield 73%).  $^1\text{H}$  NMR (500 MHz,  $\text{C}_6\text{D}_6$ )  $\delta$  52.5 (6H,  $\alpha$ -methyl), 14.9 (12H,  $\beta$ -methyl), 4.5 (8H), -0.9 (24H,  $^i\text{Pr}$ -methyl), -12.8 (8H), -16.5 (4H,  $p$ -aryl), -19.8 (24H,  $^i\text{Pr}$ -methyl) ppm.  $^1\text{H}$  NMR (500 MHz,  $\text{THF-}d_8$ )  $\delta$  47.8 (6H,  $\alpha$ -methyl), 7.2 (8H), 1.9 (24H,  $^i\text{Pr}$ -methyl), -4.6 (8H), -7.8 (12H,  $\beta$ -methyl), -10.0 (4H,  $p$ -aryl), -11.4 (24H,  $^i\text{Pr}$ -methyl). 8H resonances could be the  $^i\text{Pr}$ -methine protons or the  $m$ -aryl protons. The  $^1\text{H}$  NMR spectrum closely resembles the spectrum previously reported for  $[\text{L}^{\text{Me}}\text{Fe}]_2(\mu\text{-S})$  (**1-H**).<sup>13</sup>  $\mu_{\text{eff}}$  (Evans,  $\text{THF-}d_8$ ): 5.1(5)  $\mu_{\text{B}}$ . UV-Vis ( $\text{mM}^{-1} \text{cm}^{-1}$ ): 308(29), 344(33), 391(28), 545(1.2). Anal. Calcd for  $\text{C}_{60}\text{H}_{86}\text{Fe}_2\text{N}_4\text{S}$ : C, 71.56, H, 8.61, N, 5.56.

Found: C, 71.85, H, 8.73, N, 5.23. IR (KBr,  $\text{cm}^{-1}$ ): 3057 (w), 2958 (s), 2925 (m), 2865 (m), 1526 (m), 14612 (w), 1421 (w), 1383 (w), 1364 (w), 1337 (s), 1314 (s), 1253 (w), 1241 (w), 1181 (w), 1133 (w), 1101 (w), 1056 (w), 992 (m), 935 (w), 868 (w), 798 (w), 781 (m), 761 (m), 730 (w), 704 (w), 640 (w).

**$[\text{K}^{\text{Me}}\text{L}^{\text{Me}}\text{Fe}]_2(\mu\text{-S})$  (2-Me).** **1-Me** (168 mg, 0.166 mmol) was added to a stirring solution of potassium graphite (49.4 mg, 0.366 mmol) in  $\text{Et}_2\text{O}$  (15 mL) causing an immediate color change to dark green. The mixture was stirred for 30 minutes, filtered through a plug of Celite and the solvent was evaporated under vacuum. The solids were dissolved in pentane (6 mL) and cooled to  $-35\text{ }^\circ\text{C}$  to yield dark green crystals (111 mg, 0.10 mmol, 62%).  $^1\text{H}$  NMR (500 MHz,  $\text{C}_6\text{D}_6$ )  $\delta$  28.4 (6H,  $\alpha$ -methyl), 12.4 (8H), 4.5 (8H), 1.2 (24H,  $i$ Pr-methyl), -2.4 (24H,  $i$ Pr-methyl), -2.9 (4H,  $p$ -Aryl), -59.8 (12H,  $\beta$ -methyl) ppm.  $^1\text{H}$  NMR (500 MHz,  $\text{THF-}d_8$ )  $\delta$  29.0 (6H,  $\alpha$ -methyl), 12.7 (8H), 6.9 (4H,  $p$ -Aryl), 4.6 (8H), 1.2 (24H,  $i$ Pr-methyl), -2.8 (24H,  $i$ Pr-methyl), -62.6 (12H,  $\beta$ -methyl) ppm. 8H resonances could be the  $i$ Pr-methine protons or the  $m$ -aryl protons.  $\mu_{\text{eff}}$  (Evans,  $\text{C}_6\text{D}_6$ ): 2.6(3)  $\mu_{\text{B}}$ . UV-Vis ( $\text{mM}^{-1}\text{ cm}^{-1}$ ): 306(36), 375(17), 461(13), 681(sh,  $\sim 11$ ), 753(14), 900(2.2). IR (KBr,  $\text{cm}^{-1}$ ): 3050 (w), 2967 (s), 2926 (m), 2864 (m), 1574 (w), 1530 (w), 1462 (m), 1429 (m), 1405 (m), 1381 (w), 1354 (w), 1326 (vs), 1236 (m), 1190 (w), 1098 (m), 1058 (w)  $\text{cm}^{-1}$ . Anal. Calcd for  $\text{C}_{60}\text{H}_{86}\text{Fe}_2\text{K}_2\text{N}_4\text{S}$ : C, 66.40, H, 7.99, N, 5.16. Found: C, 66.70, H, 8.37, N, 4.96.

**$[\text{KL}^{\text{Me}}\text{Fe}]_2(\mu\text{-S})$  (2-H).** An analogous procedure was used as for  $[\text{K}^{\text{Me}}\text{L}^{\text{Me}}\text{Fe}]_2(\mu\text{-S})$  (2-Me) substituting  $[\text{L}^{\text{Me}}\text{Fe}]_2(\mu\text{-S})$  (1-H) for **1-Me** (71% yield).  $^1\text{H}$  NMR (500 MHz,  $\text{C}_6\text{D}_6$ )  $\delta$  12.1 (8H), 4.8 (8H), 1.3 (24H,  $i$ Pr-methyl), -1.5 (4H,  $p$ -Aryl), -2.5 (24H,  $i$ Pr-methyl), -16.4 (2H,  $\alpha$ -H), -64.3 (12H,  $\beta$ -Me). 4H resonances could be the  $i$ Pr-methine protons or the  $m$ -aryl protons.  $\mu_{\text{eff}}$  (Evans,  $\text{C}_6\text{D}_6$ ):

3.0(2)  $\mu_B$ . UV-Vis ( $\text{mM}^{-1} \text{cm}^{-1}$ ): 300(43), 368(sh, 20), 450(16), 670(sh, 11), 768(14), 920(2.4). IR (KBr,  $\text{cm}^{-1}$ ): 3055 (w), 2957 (s), 2921 (m), 2862 (m), 1566 (w), 1513 (m), 1459 (m), 1427 (s), 1388 (s), 1321 (s), 1257 (m), 1174 (w), 1100 (w), 1003 (w). Anal. Calcd for  $\text{C}_{58}\text{H}_{82}\text{Fe}_2\text{K}_2\text{N}_4\text{S}$ : C, 65.89, H, 7.82, N, 5.30. Found: C, 66.03, H, 8.00, N, 5.22.

**[Na<sup>Me</sup>L<sup>Me</sup>Fe]<sub>2</sub>( $\mu$ -S) (3-Me).** Sodium metal (46.5 mg, 2.0 mmol) was weighed out in a vial making sure to expose a high surface area. **1-Me** (208 mg, 0.21 mmol) was dissolved in THF (20 mL) and pipetted onto the Na<sup>0</sup> and stirred for 1.5 hours. The solution was decanted from the sodium, pumped down to solids and redissolved in pentane (10 mL). The solution was filtered through Celite, discarding the first few drops, concentrated and cooled to -35 °C to give dark green crystals (122 mg, 0.12 mmol, 56%). Characterization by of the dark green product by <sup>1</sup>H NMR spectroscopy showed a very similar peak pattern as **2-Me**. <sup>1</sup>H NMR (500 MHz, C<sub>6</sub>D<sub>6</sub>)  $\delta$  30.3 (6H,  $\alpha$ -methyl), 13.5 (8H), 3.5 (8H), 1.4 (24H, <sup>i</sup>Pr-methyl), -2.6 (24H, <sup>i</sup>Pr-methyl), -6.3 (4H, *p*-Aryl), -57.7 (12H,  $\beta$ -methyl) ppm. <sup>1</sup>H NMR (500 MHz, THF-d<sub>8</sub>)  $\delta$  30.2 (6H,  $\alpha$ -methyl), 13.8 (8H), 6.9 (8H), 0.9 (24H, <sup>i</sup>Pr-methyl), -2.9 (24H, <sup>i</sup>Pr-methyl), -6.0 (4H, *p*-Aryl), -58.5 (12H,  $\beta$ -methyl) ppm. 8H resonances could be the <sup>i</sup>Pr-methine protons or the *m*-aryl protons.  $\mu_{\text{eff}}$  (Evans, C<sub>6</sub>D<sub>6</sub>): 2.7(2)  $\mu_B$ . UV-Vis ( $\text{mM}^{-1} \text{cm}^{-1}$ ): 301(28), 467(12), 658(10), 705(10), 889(1.5). IR (KBr,  $\text{cm}^{-1}$ ): 3057 (w), 2958 (s), 2926 (m), 2907 (m), 2865 (m), 1575 (w), 1526 (w), 1462 (m), 1431 (m), 1409 (m), 1382 (w), 1344 (s), 1320 (s), 1261 (w), 1237 (m), 1192 (w), 1100 (m)  $\text{cm}^{-1}$ . Calcd with 1 pentane molecule  $\text{C}_{65}\text{H}_{98}\text{Fe}_2\text{N}_4\text{Na}_2\text{S}$ : C, 69.38, H, 8.78, N, 4.98. Found: C, 69.48, H, 8.66, N, 4.88.

## Cation Exchange Reactions in C<sub>6</sub>D<sub>6</sub> and Et<sub>2</sub>O

**2-Me** (5 mg, 5  $\mu$ mol) was dissolved in 0.8 mL C<sub>6</sub>D<sub>6</sub> or Et<sub>2</sub>O, and sealed in a J. Young NMR tube with a Cp<sub>2</sub>Co capillary standard in C<sub>6</sub>D<sub>6</sub>. **3-Me** was quantified by <sup>1</sup>H NMR spectroscopy. **3-Me** (5 mg, 5  $\mu$ mol) in 0.4 mL C<sub>6</sub>D<sub>6</sub> or Et<sub>2</sub>O was added and mixed on a rotator. The reaction was monitored by <sup>1</sup>H NMR spectroscopy for 48 hours. Not all peaks for **4-Me** were distinguishable because of overlap. The <sup>1</sup>H NMR spectra can be seen below (Figure S-2).

## Addition of external K<sup>+</sup> and Na<sup>+</sup> sources

**2-Me** (5 mg, 5  $\mu$ mol) was dissolved in 0.8 mL Et<sub>2</sub>O and sealed in a J. Young NMR tube with a Cp<sub>2</sub>Co capillary standard in C<sub>6</sub>D<sub>6</sub>. An <sup>1</sup>H NMR spectrum was taken to check for purity. Na[BAr<sup>F</sup><sub>4</sub>] (10 mg, 10  $\mu$ mol) was dissolved and added to **2-Me**. Another <sup>1</sup>H NMR spectrum was obtained followed by addition of subsequent equivalents of Na[BAr<sup>F</sup><sub>4</sub>]. Growth of peaks assigned to **4-Me** was seen as well as peaks corresponding to **3-Me** once two equivalents of Na[BAr<sup>F</sup><sub>4</sub>] were added. The fraction of each species could not be determined quantitatively because of overlap and low resolution (<sup>1</sup>H NMR spectra were taken in Et<sub>2</sub>O for solubility reasons).

An analogous procedure was used for **3-Me** where KOTf was used as the K<sup>+</sup> source.

The <sup>1</sup>H NMR spectra can be seen below (Figure S-3 and Figure S-4).

## Control experiments

**2-Me** (5 mg, 5  $\mu$ mol) and KOTf (50 mM solution in Et<sub>2</sub>O, 0.1 mL, 5  $\mu$ mol) were mixed in Et<sub>2</sub>O (0.9 mL) and no growth of new peaks was seen over multiple hours.

**3-Me** (5 mg, 5  $\mu\text{mol}$ ) and  $\text{Na}[\text{BAR}^{\text{F}}_4]$  (5 mg, 5  $\mu\text{mol}$ ) were mixed in  $\text{Et}_2\text{O}$  (1.2 mL) and no growth of new peaks was seen over multiple hours.

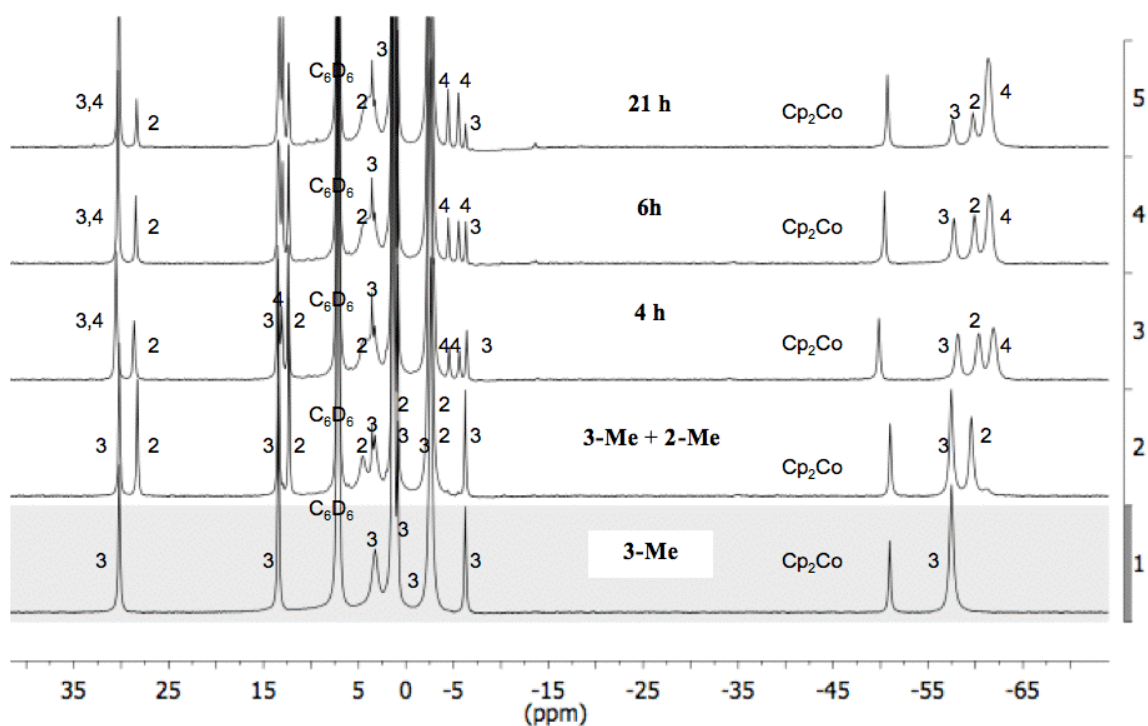

**Figure S-2:** Cation exchange between **2-Me** and **3-Me**. Compounds were dissolved in  $\text{C}_6\text{D}_6$  and reaction was monitored by  $^1\text{H}$  NMR spectroscopy with a  $\text{Cp}_2\text{Co}$  capillary standard (-51 ppm). The peaks for each compound are labeled by their compound number from the text. Peaks corresponding to **4-Me** lie at  $\delta$  30.2, 13.0, -4.4, -5.5, -61.2 ppm.

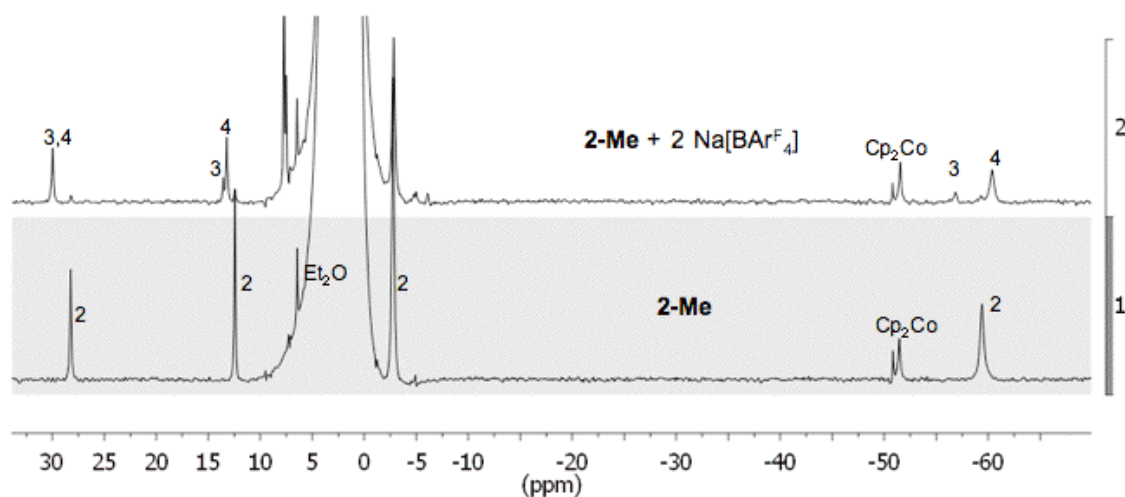

**Figure S-3:** Cation exchange by addition of 2 equiv of Na[BarF<sub>4</sub>] to **2-Me** in Et<sub>2</sub>O. The reaction was monitored by <sup>1</sup>H NMR spectroscopy with a Cp<sub>2</sub>Co capillary standard (-51 ppm).

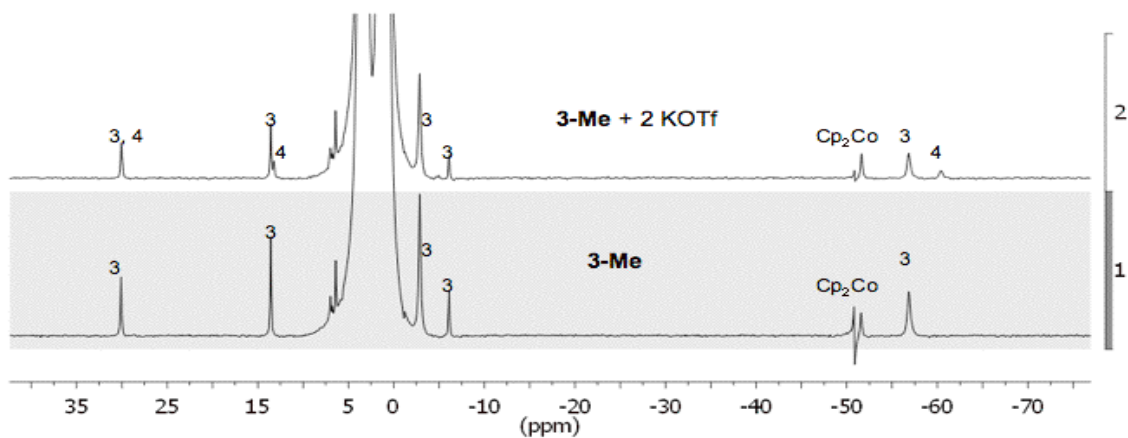

**Figure S-4:** Cation exchange by addition of 2 equiv of KOTf to **3-Me** in Et<sub>2</sub>O. The reaction was monitored by <sup>1</sup>H NMR spectroscopy with a Cp<sub>2</sub>Co capillary standard (-51 ppm).

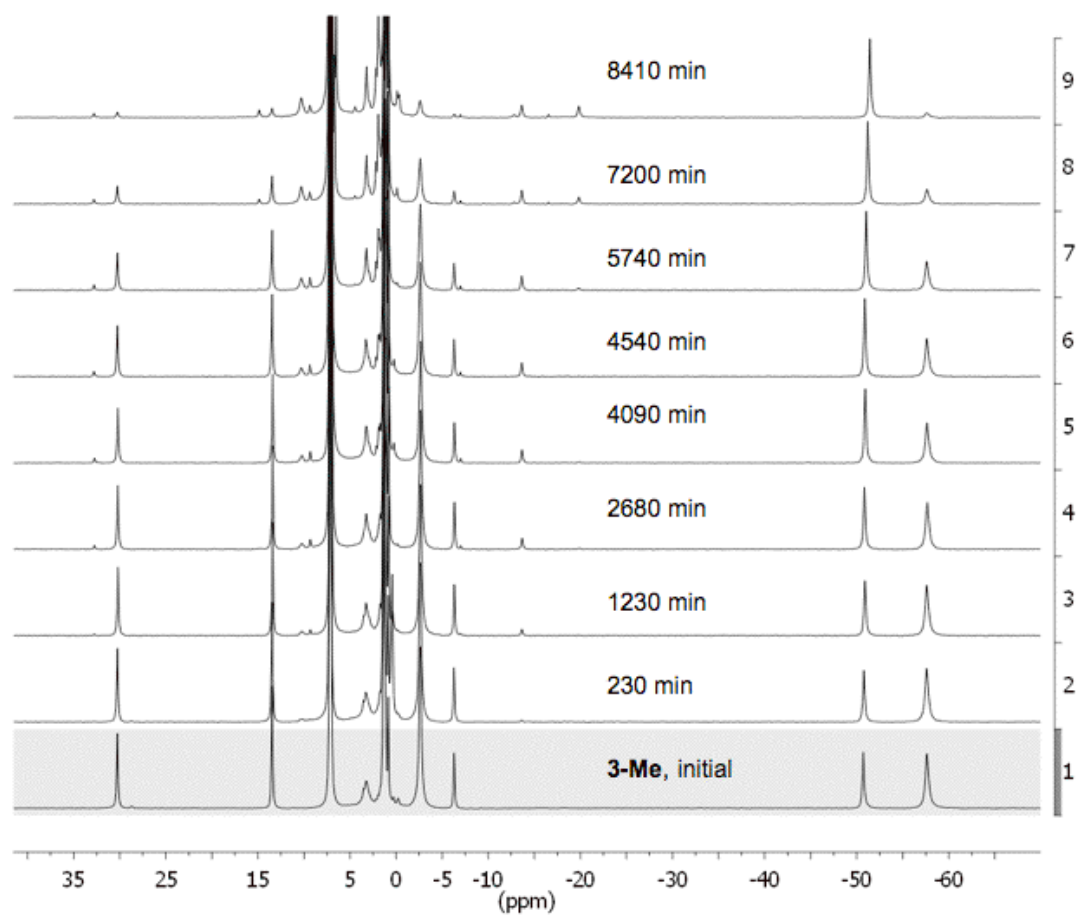

**Figure S-5:** Decomposition of **3-Me** in  $\text{C}_6\text{D}_6$  at  $60^\circ\text{C}$ . The reaction was monitored by  $^1\text{H}$  NMR spectroscopy with a  $\text{Cp}_2\text{Co}$  capillary standard (-51 ppm).

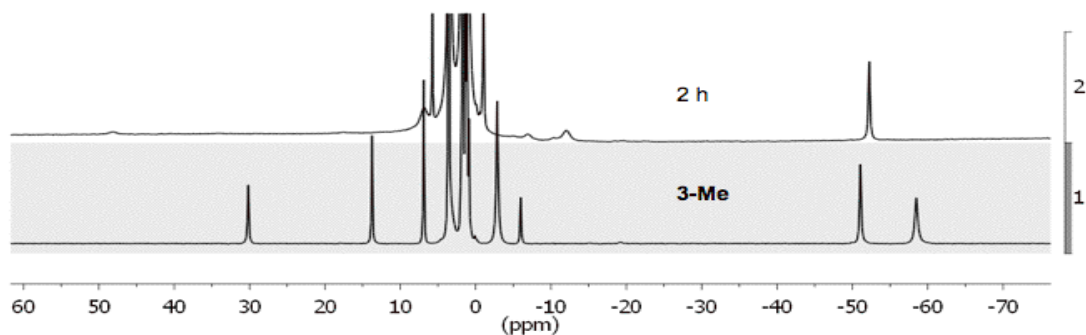

**Figure S-6:** Decomposition of **3-Me** in THF- $d_8$  at 60 °C. The reaction was monitored by  $^1\text{H}$  NMR spectroscopy with a  $\text{Cp}_2\text{Co}$  capillary standard (-51 ppm).

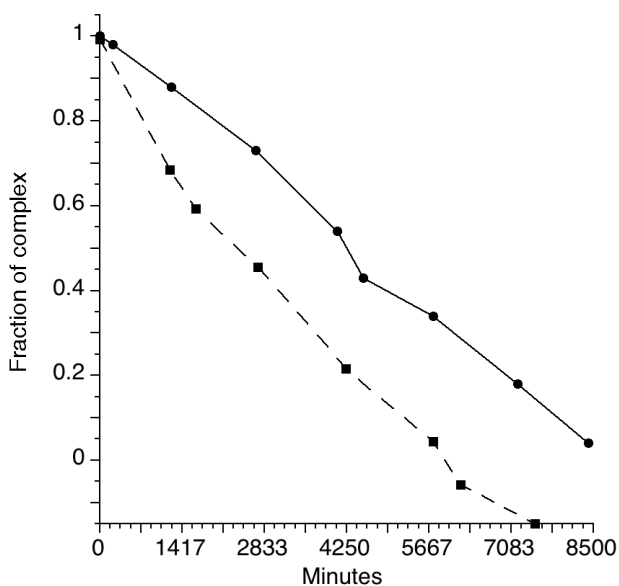

**Figure S-7:** Decomposition of  $[\text{M}_\text{A}\text{LFe}]_2(\mu\text{-S})$  compounds at 60 °C in  $\text{C}_6\text{D}_6$ . A solution of 2.9 mM  $[\text{K}^{\text{Me}}\text{L}^{\text{Me}}\text{Fe}]_2(\mu\text{-S})$  (**2-Me**, dashed line, square markers) or 2.4 mM  $[\text{Na}^{\text{Me}}\text{L}^{\text{Me}}\text{Fe}]_2(\mu\text{-S})$  (**3-Me**, solid line, circle markers) in  $\text{C}_6\text{D}_6$  was monitored by  $^1\text{H}$  NMR spectroscopy, and the integrations of the  $\alpha\text{-Me}$  and  $\beta\text{-Me}$  peaks were compared to that of an internal standard of  $(\text{C}_5\text{H}_5)_2\text{Co}$  in  $\text{C}_6\text{D}_6$ .

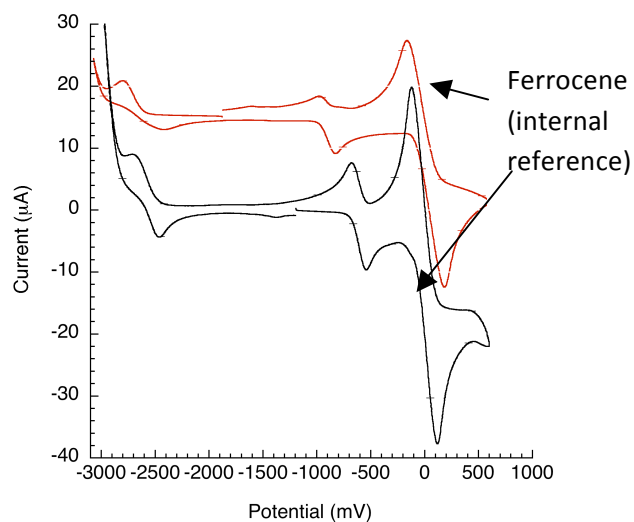

**Figure S-8.** Comparison of CV in diethyl ether and THF with 50 mM  $[\text{NBu}_4][\text{BAr}^{\text{F}}_4]$ . Black line: Cyclic voltammogram of 2 mM **1-Me** in  $\text{Et}_2\text{O}$ . The  $E_{1/2}$  values are -0.7 V for the oxidation wave and -2.7 V for the reduction wave, vs. a ferrocene reference. Notice that the sizes of these waves are similar, implying that the same number of electrons are passed. Red line: Cyclic voltammogram of 2 mM **1-Me** in THF. The  $E_{1/2}$  values are -0.9 V for the oxidation wave and -2.6 V for the reduction wave, vs. a ferrocene reference. Since THF binds to **1-Me** (data not shown), it is reasonable that both waves occur at more positive potentials (THF binding stabilizes the more oxidized form).

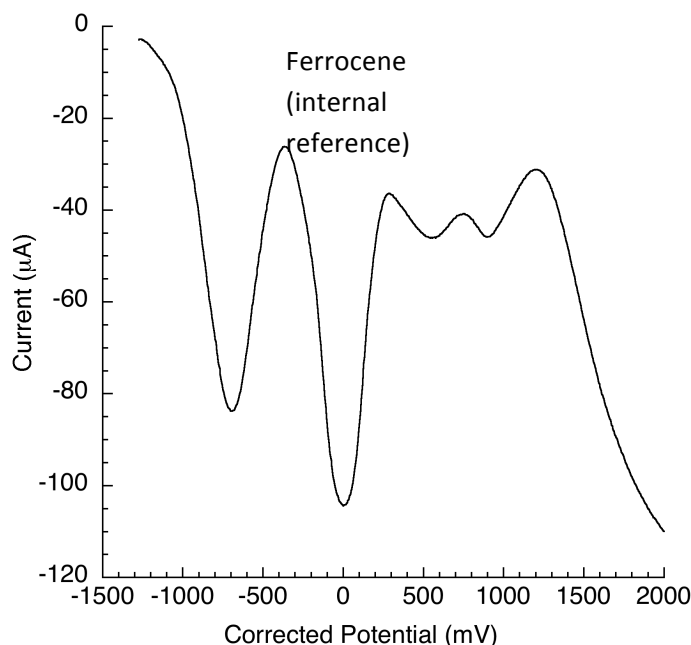

**Figure S-9.** Differential pulse voltammogram of a sample of **1-Me** (3.8 mM), ferrocene (3.8 mM) with 50 mM  $[\text{NBu}_4][\text{BAR}^{\text{F}}_4]$  in  $\text{Et}_2\text{O}$ . The voltammogram is shown in the oxidizing direction. The oxidation wave for the diiron sulfide complex is observed at -0.7 V, and ferrocene at 0.0 V. The similar heights of the peaks show that both redox events involve the same number of electrons, and therefore the oxidation of **1-Me** is a one-electron event like ferrocene oxidation. Because the oxidation and reduction waves in the cyclic voltammogram of **1-Me** (Figure S-8) are the same size, it is most likely that the reduction of **1-Me** is also a one-electron event. Therefore, the **1-Me** reduction wave in the CV *does not* correspond to formation of a diiron(I) complex (**2-Me** or **3-Me**). We have been unable to isolate any mixed-valence iron(I)iron(II) complexes, despite numerous attempts with different strategies. Therefore, the nature of the presumed intermediates during formation of **2-Me** and **3-Me** remains unknown.

**Magnetic susceptibility.** Magnetic susceptibility data were measured with powder samples in the temperature range 2 - 300 K using a SQUID susceptometer (MPMS-7, Quantum Design) with a field of 1.0 T. The experimental data were corrected for underlying diamagnetism by use of tabulated Pascal's constants,<sup>15,16</sup> as well as for temperature-independent paramagnetism. The susceptibility and magnetization data were simulated with our own package julX for exchange coupled systems.<sup>17</sup> The simulations are based on the spin-Hamilton operator for two identical Fe(II) high-spin ions with spins  $S_1 = S_2 = 3/2$ :

$$\hat{H} = -2J \hat{S}_1 \cdot \hat{S}_2 + g\beta(\hat{S}_1 + \hat{S}_2) \cdot \vec{B} \quad (1)$$

where  $J$  is the exchange coupling constants and  $g$  represents the average electronic  $g$  values for both iron sites. Zero-field splitting was neglected in the simulation of the magnetic data of (2) because the ground state of the coupled spin system is a singlet ( $S = 0$ ) and the measurements are not sensitive to the corresponding weak splitting of the excited states, the first of which ( $S = 1$ ) is at an energy of  $246 \text{ cm}^{-1}$  (the spin ladder has states with spin  $S$  at energies  $E(S) = -J S(S+1)$ ). Diagonalization of the Hamiltonian was performed with the routine ZHEEV from the LAPACK Library<sup>18</sup> and the magnetic moments were obtained from the eigenfunctions using the Hellman-Feynman theorem  $dE_i/dB = \langle \psi_i | dH/dB | \psi_i \rangle$ . The powder summations were done by using a 16-point Lebedev grid.<sup>19,20</sup>

**Mössbauer Spectroscopy.** Mössbauer data were recorded on a spectrometer with alternating constant acceleration. The minimum experimental line width was  $0.24 \text{ mm s}^{-1}$  (full width at half-height). The sample temperature was maintained constant either in an Oxford Instruments Variox or an Oxford Instruments Mössbauer-Spectromag cryostat. The latter is a split-pair super-conducting magnet system for applied fields up to 8 T where the temperature of the sample can be varied in the range 1.5 K to 250 K. The field at the sample is perpendicular to the  $\gamma$ -beam. The  $^{57}\text{Co/Rh}$  source (1.8 GBq) was positioned at room temperature inside the gap of the magnet system at a zero-field position. Isomer shifts are quoted relative to iron metal at 300 K. Magnetic Mössbauer spectra were simulated with the usual nuclear Hamiltonian.<sup>21</sup>

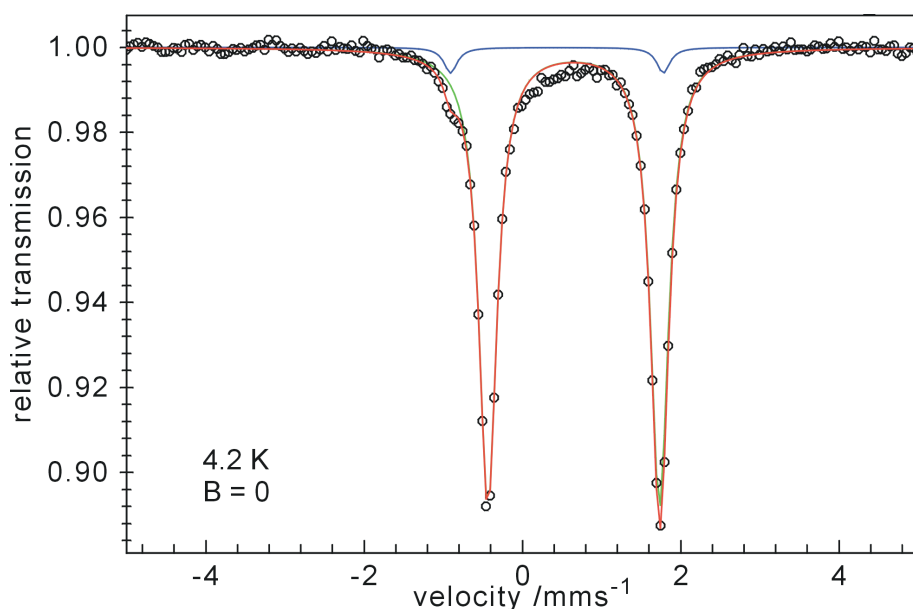

**Figure S-10.** Zero-field Mössbauer spectrum of solid **2-Me** recorded at 4.2 K. A second sample had to be used, since the first one, used for Figure 2a (top) had been decomposed after storage in liquid nitrogen. This sample was also used for the applied field measurement depicted in figure 2a (bottom). The Mössbauer parameters of the main component (96%) are  $\delta = 0.67 \text{ mm s}^{-1}$ ,  $\Delta E_Q = 2.17 \text{ mm s}^{-1}$ , which is identical to the values observed at 80 K. The minor component (blue line, 4%) shows  $\delta = 0.44 \text{ mm s}^{-1}$ ,  $\Delta E_Q = 2.69 \text{ mm s}^{-1}$ .

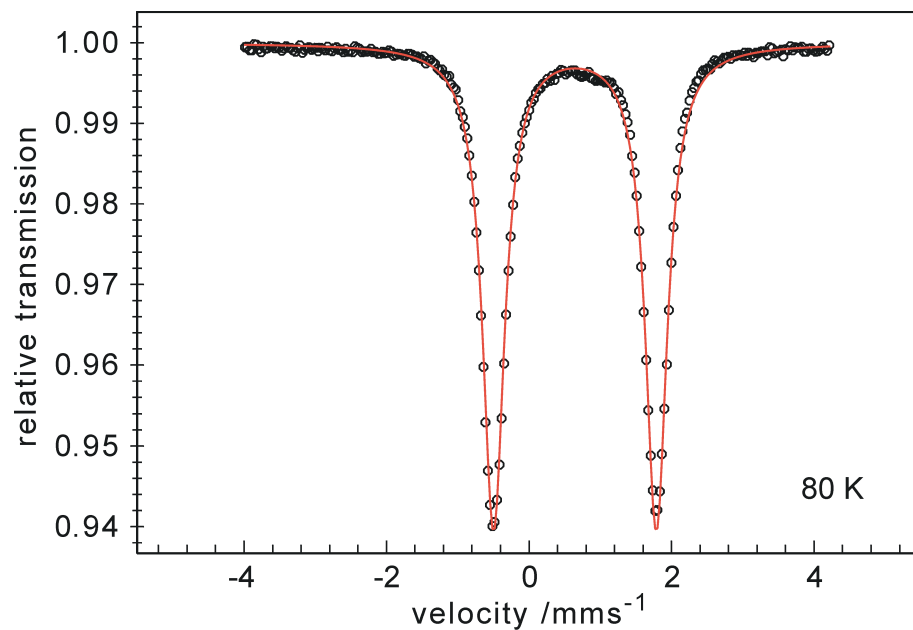

**Figure S-11.** Zero-field Mössbauer spectrum of solid **3-Me** recorded at 80 K. The Mössbauer parameters obtained from a fit with Lorentzian lines are  $\delta = 0.64 \text{ mm s}^{-1}$ ,  $\Delta E_Q = 2.28 \text{ mm s}^{-1}$ .

## References

- (1) Evans, D. F. *J. Chem. Soc.* **1959**, 2003-5.
- (2) Schubert, E. M. *J. Chem. Educ.* **1992**, 69, 62.
- (3) Bailey, P. J.; Coxall, R. A.; Dick, C. M.; Fabre, S.; Henderson, L. C.; Herber, C.; Liddle, S. T.; Lorono-Gonzalez, D.; Parkin, A.; Parsons, S. *Chem. Eur. J.* **2003**, 9, 4820-4828.
- (4) Stender, M.; Wright, R. J.; Eichler, B. E.; Prust, J.; Olmstead, M. M.; Roesky, H. W.; Power, P. P. *J. Chem. Soc., Dalton Trans.* **2001**, 3465-3469.
- (5) Feldman, J.; McLain, S. J.; Parthasarathy, A.; Marshall, W. J.; Calabrese, J. C.; Arthur, S. D. *Organometallics* **1997**, 16, 1514-1516.
- (6) Kern, R. J. *J. Inorg. Nucl. Chem.* **1962**, 24, 1105-9.
- (7) Vela, J.; Vaddadi, S.; Cundari, T. R.; Smith, J. M.; Gregory, E. A.; Lachicotte, R. J.; Flaschenriem, C. J.; Holland, P. L. *Organometallics* **2004**, 23, 5226-5239.
- (8) Jones, W. D.; Selmecky, A. D. *Organometallics* **1992**, 11, 889-93.
- (9) Yakelis, N. A.; Bergman, R. G. *Organometallics* **2005**, 24, 3579-3581.
- (10) Le Bras, J.; Jiao, H.; Meyer, W. E.; Hampel, F.; Gladysz, J. A. *J. Organomet. Chem.* **2000**, 616, 54-66.
- (11) Budzelaar, P. H. M.; Moonen, N. N. P.; de Gelder, R.; Smits, J. M. M.; Gall, A. W. *Eur. J. Inorg. Chem.* **2000**, 753-769.
- (12) Eckert, N. A.; Smith, J. M.; Lachicotte, R. J.; Holland, P. L. *Inorg. Chem.* **2004**, 43, 3306-3321.
- (13) Vela, J.; Stoian, S.; Flaschenriem, C. J.; Münck, E.; Holland, P. L. *J. Am. Chem. Soc.* **2004**, 126, 4522-4523.
- (14) Holland, P. L. *Acc. Chem. Res.* **2008**, 41, 905-914.
- (15) O'Connor, C. J. *Prog. Inorg. Chem.* **1982**, 29, 203-83.
- (16) Weast, R. C.; Astle, M. J. *CRC Handbook of Chemistry and Physics*. CRC Press Inc.: Boca Raton, Florida, 1979.
- (17) Available from E.B.: [http://ewww.mpi-muelheim.mpg.de/back/logins/bill/julX\\_en.php](http://ewww.mpi-muelheim.mpg.de/back/logins/bill/julX_en.php).
- (18) The routines are available at <http://www.netlib.org/lapack/>.
- (19) Lebedev, V. I.; Laikov, D. N. *Doklady Math.* **1999**, 59, 477.
- (20) A Fortran code to generate Lebedev grids up to order L = 121 is available at <http://server.ccl.net/cca/software/SOURCES/>.
- (21) Trautwein, A. X.; Bill, E.; Bominaar, E. L.; Winkler, H., *Structure and Bonding* 1991, 78, 1-95.

**Computations.** The electronic structure of **2-Me** has been calculated using density functional theory (DFT) as described previously for the related iron(I) hydride compounds<sup>1</sup> using the ORCA program.<sup>2</sup> The B3LYP<sup>3</sup> and TPSSh<sup>4</sup> functionals with various basis sets<sup>5-7</sup> have been examined, and the effects of truncating the nacnac ligand and modeling dissolution in water using the conductor-like screening model (COSMO)<sup>8</sup> have also been explored. All calculations used an empirical van der Waals correction to the DFT energy.<sup>9</sup> To model the antiferromagnetic coupling, we performed our calculations on **2-Me** using Broken Symmetry DFT.<sup>10,11</sup> We gauged the accuracy of our calculations by comparing the experimental Mössbauer parameters and antiferromagnetic exchange coupling constant ( $J$ ) with the calculated values.<sup>11,12</sup>

As with the iron(I) hydride complexes,<sup>1</sup> employing the TPSSh functional with the TZVP<sup>5</sup> basis set at the iron using the atomic coordinates from the X-ray crystal structure (without geometry optimization) provided results that agreed with the experimentally determined values (Table S1).<sup>13</sup> The agreement in the isomer shift is reasonable compared to the standard deviation (0.10 mm/s) of the isomer shifts in the "training set" used for the empirical determination of the calculated isomer shift from the calculated electron density at the iron atom.<sup>12</sup>

**Table 1.** Calculated (TPSSh/TZVP)<sup>4</sup> and experimental isomer shift ( $\delta$ ), quadrupole splitting ( $\Delta E_q$ ), and antiferromagnetic exchange coupling constant ( $J$ )<sup>11a,b</sup> for complex **2-Me**. Calculated values are from a single-point calculation on an all-atom model at the crystal-structure geometry.

|       | $\delta$ (mm s <sup>-1</sup> ) | $\Delta E_q$ (mm s <sup>-1</sup> ) | $J$ (cm <sup>-1</sup> ) |
|-------|--------------------------------|------------------------------------|-------------------------|
| exp.  | 0.67                           | -2.17                              | -123                    |
| calc. | 0.54                           | -1.85                              | -170                    |

The electronic structure description of **2-Me** derived from our calculations reveals the presence of two antiferromagnetically-coupled high-spin Fe<sup>I</sup> centers (Figure S12). A small degree of  $\pi$ -backbonding from the Fe<sup>I</sup> centers to the diketiminate LUMOs is observed, but the amount of spin density on the diketiminate ligands is too small to indicate "redox non-innocence" (Figure S13).

**Figure S12.** (a) Simplified MO interaction diagram depicting the mechanism of antiferromagnetic exchange coupling between the two iron(I) centers. A filled and an unfilled orbital mix via configuration interaction, which is modeled here using broken symmetry DFT. Two of these interactions are present, using orbitals whose orientation differs by 90°. (b) Calculated MOs corresponding to the bonding (bottom) and antibonding (top) orbitals described in (a); the non-bonding orbitals are shown in the manuscript (top of Figure 3).

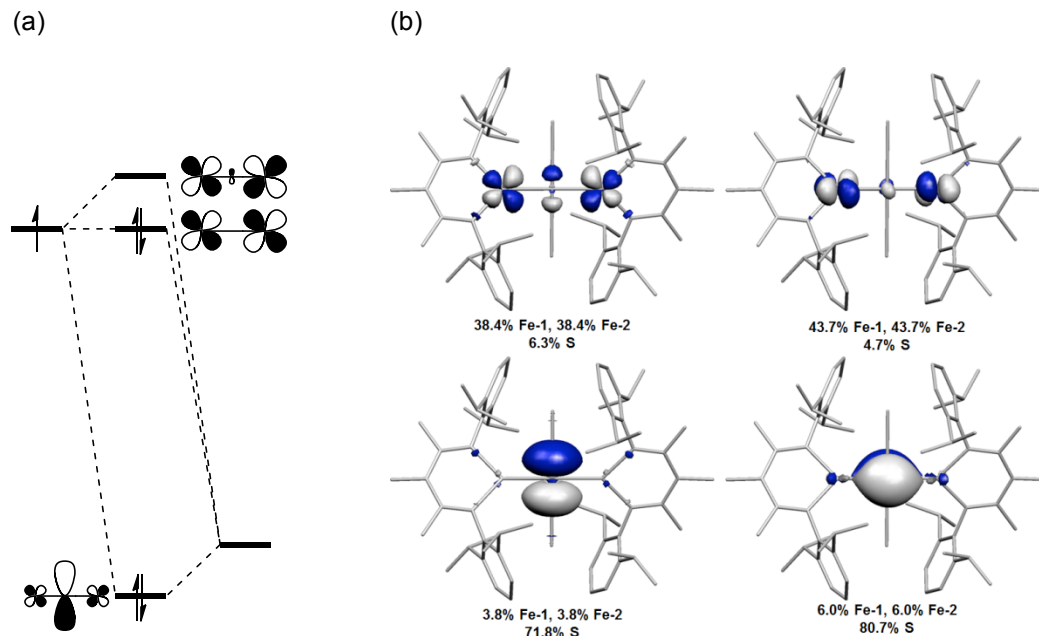

**Figure S13.** (a) Unrestricted corresponding orbital (UCO) picture of the HOMO–1 (bottom) and HOMO (top) of high-spin ( $S_{\text{tot}} = 3$ ) **2-Me** (two *ferromagnetically coupled* high-spin Fe(I) ions). These orbitals are the only doubly-occupied MOs that have a spatial overlap between the alpha- and beta-spin components of less than 0.992 in the  $S_{\text{tot}} = 3$  solution. The SOMOs of this calculation (b) are largely metal centered. This high-spin calculation has very low spin contamination (1.9%) and the doubly-occupied orbitals are qualitatively identical to those in the BS(3,3) ( $S_{\text{tot}} = 0$ ) calculation, revealing that *antiferromagnetic* coupling between the two high-spin Fe(I) centers satisfactorily accounts for the spin contamination in the BS(3,3) calculation, providing further justification (beyond our calculated Mössbauer parameters and  $J$  value) for our use of broken-symmetry calculations in the present case. This calculation also shows that a slight amount of beta spin lies on the diketiminate ligand, but the overlaps between alpha and beta spins in the HOMO–1 and HOMO are too high to indicate "redox non-innocence."

(a)

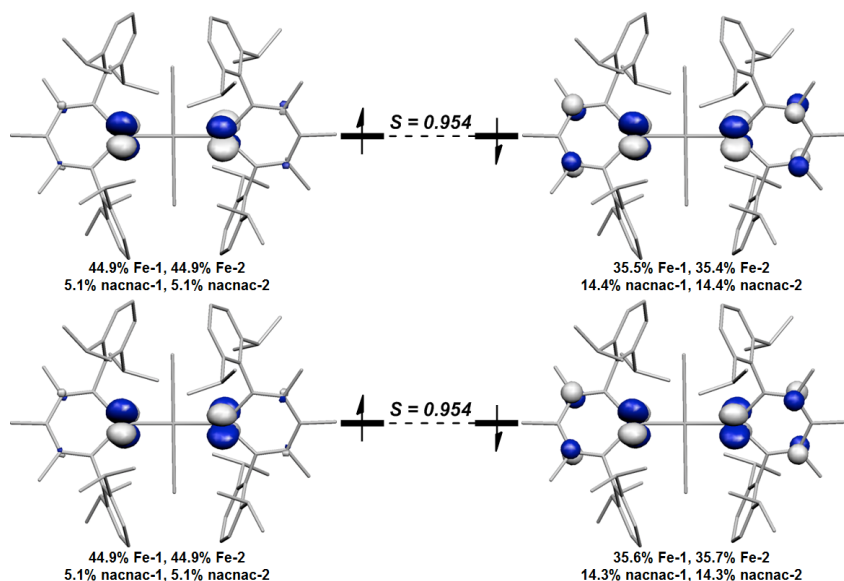

(b)

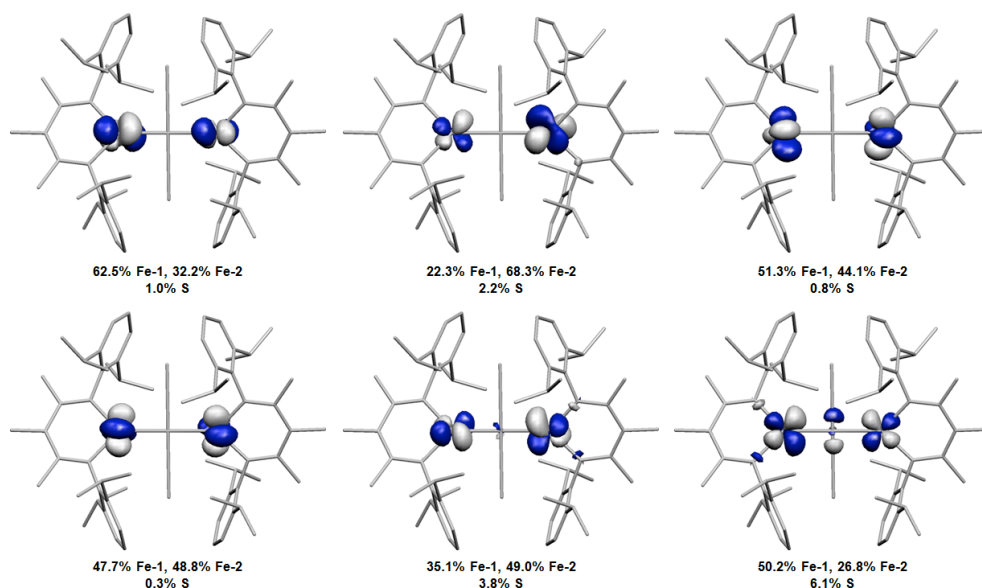

**Table S1.** Calculated Mössbauer parameters and antiferromagnetic exchange coupling constants ( $J$ ) from single-point calculations on the crystal structure geometry of 2-Me using various functionals and basis sets at the iron center. Calculations were performed using the broken-symmetry method BS(3,3),  $S_{\text{total}} = 0$ . Calculations using BS(5,5) – corresponding to two high-spin iron(II) ions with antiferromagnetically coupled ligand radicals – converged to the same solution as the BS(3,3) calculation. Experimental values:  $\delta = 0.67 \text{ mm s}^{-1}$ ,  $\Delta E_Q = -2.17 \text{ mm s}^{-1}$ ,  $J = -123 \text{ cm}^{-1}$ . The calculated values of  $\Delta E_Q$  and  $\delta$  for each iron center are identical.

| functional | basis set at Fe | $\delta \text{ (mm s}^{-1}\text{)}$ | $\Delta E_Q \text{ (mm s}^{-1}\text{)}$ | $J \text{ (cm}^{-1}\text{)}$ |
|------------|-----------------|-------------------------------------|-----------------------------------------|------------------------------|
| B3LYP      | TZVP            | 0.52                                | -1.78                                   | -144                         |
|            | CP(PPP)         | 0.50                                | -1.97                                   | -143                         |
| TPSSh      | TZVP            | 0.54                                | -1.85                                   | -170                         |
|            | CP(PPP)         | 0.41                                | -2.05                                   | -168                         |

**Table S2.** Calculated Mössbauer parameters from geometry-optimized calculations starting from the crystal-structure geometry of **2-Me** using various functionals and basis sets at the iron center. When the basis set CP(PPP) was used at iron, these calculations were run as single-point calculations on the corresponding TZVP-optimized geometry. Calculations were performed as described in the Experimental section of the manuscript (BS(3,3),  $S_{\text{total}} = 0$ ). Experimental values:  $\delta = 0.67 \text{ mm s}^{-1}$ ,  $\Delta E_Q = -2.17 \text{ mm s}^{-1}$ ,  $J = -123 \text{ cm}^{-1}$ .

| functional | basis set at Fe | $\delta \text{ (mm s}^{-1}\text{)}$ | $\Delta E_Q \text{ (mm s}^{-1}\text{)}$ | $J \text{ (cm}^{-1}\text{)}$ |
|------------|-----------------|-------------------------------------|-----------------------------------------|------------------------------|
| B3LYP      | TZVP            | 0.63, 0.63                          | -1.56, -1.56                            | -31                          |
|            | CP(PPP)         | 0.60, 0.60                          | -1.67, -1.67                            | -31                          |
| TPSSh      | TZVP            | 0.60, 0.60                          | -1.74, -1.68                            | -96                          |
|            | CP(PPP)         | 0.46, 0.45                          | -1.87, -1.80                            | -100                         |
| TPSS       | TZVP            | 0.51, 0.51                          | -1.67, -1.67                            | -172                         |
|            | CP(PPP)         | 0.51, 0.51                          | -1.85, -1.85                            | -173                         |

**Table S3.** Calculated Mössbauer parameters from single-point calculations on the geometry from a TPSS geometry optimization starting from the crystal structure geometry of **2-Me** using various functionals and basis sets at the iron center. This set of calculations mimics an approach described previously (Römel, M.; Ye, S.; Neese, F. *Inorg. Chem.* **2009**, 48, 784). Calculations were performed as described in the Experimental section of the manuscript (BS(3,3),  $S_{\text{total}} = 0$ ). Experimental values:  $\delta = 0.67 \text{ mm s}^{-1}$ ,  $\Delta E_Q = -2.17 \text{ mm s}^{-1}$ ,  $J = -122 \text{ cm}^{-1}$ . The calculated values of  $\Delta E_Q$  and  $\delta$  for each iron center are identical. Although the TPSSh/TZVP combination gives good agreement with experiment, the TPSS-optimized geometry has bonds to iron that are  $\sim 0.04 \text{ \AA}$  longer than in the crystal-structure geometry, and we have therefore chosen to include the TPSSh/TZVP single-point calculation in the manuscript. Moreover, inspection of the orbitals and spin populations in the geometry-optimized model showed that they were similar to those derived from the X-ray coordinates, indicating that the conclusions in this paper are not very sensitive to these geometrical details.

| functional | basis set at Fe | $\delta \text{ (mm s}^{-1}\text{)}$ | $\Delta E_Q \text{ (mm s}^{-1}\text{)}$ | $J \text{ (cm}^{-1}\text{)}$ |
|------------|-----------------|-------------------------------------|-----------------------------------------|------------------------------|
| B3LYP      | TZVP            | 0.58                                | -1.76                                   | -107                         |
|            | CP(PPP)         | 0.55                                | -1.96                                   | -108                         |
| TPSSh      | TZVP            | 0.60                                | -1.80                                   | -126                         |
|            | CP(PPP)         | 0.46                                | -2.0                                    | -127                         |

**Table S4.** Calculated Mössbauer parameters of **2-Me** from single-point calculations using the TPSSh functional following nacnac truncation (see below) and TPSSh optimization of only the hydrogen atom positions. Calculations were run with and without the conductor-like screening model (COSMO) to mimic solvation in water. These results show that, using various levels of truncation, the inclusion of COSMO has an insignificant effect on the calculated Mössbauer parameters for this molecule, which is important because the full structure was too large to incorporate COSMO in the calculation and we had found COSMO to be important for calculating Mössbauer parameters of an *anionic* Fe(I)-hydride complex.<sup>1</sup>

In all cases, the TZVP basis set was applied at the iron center. Calculations used broken symmetry (3,3),  $S_{\text{total}} = 0$ . Experimental values:  $\delta = 0.67 \text{ mm s}^{-1}$ ,  $\Delta E_Q = -2.17 \text{ mm s}^{-1}$ ,  $J = -123 \text{ cm}^{-1}$ . The calculated values of  $\Delta E_Q$  and  $\delta$  for each iron center are identical.

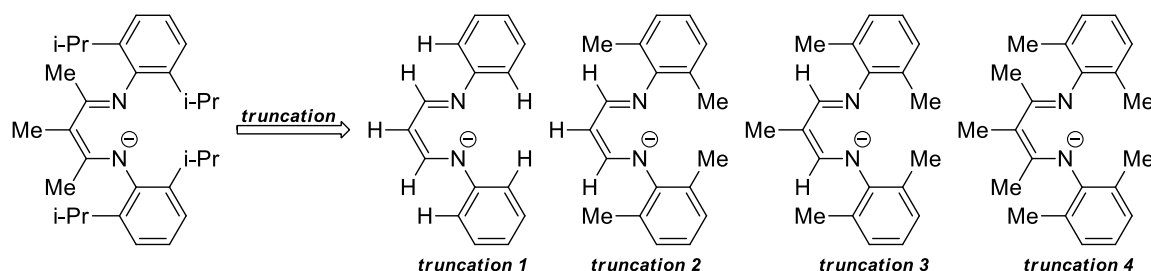

| truncation        | COSMO(water) | $\delta \text{ (mm s}^{-1}\text{)}$ | $\Delta E_Q \text{ (mm s}^{-1}\text{)}$ | $J \text{ (cm}^{-1}\text{)}$ |
|-------------------|--------------|-------------------------------------|-----------------------------------------|------------------------------|
| 1                 | yes          | 0.49                                | -1.76                                   | -155                         |
|                   | no           | 0.51                                | -1.98                                   | -155                         |
| 2                 | yes          | 0.51                                | -1.91                                   | -166                         |
|                   | no           | 0.51                                | -1.87                                   | -166                         |
| 3                 | yes          | 0.50                                | -1.91                                   | -166                         |
|                   | no           | 0.51                                | -1.88                                   | -167                         |
| 4                 | yes          | 0.53                                | -1.75                                   | -166                         |
|                   | no           | 0.53                                | -1.74                                   | -167                         |
| none <sup>a</sup> | no           | 0.54                                | -1.88                                   |                              |

(a) Hydrogen atom positions of the full crystal-structure geometry were optimized. Implementation of COSMO failed with the full structure, presumably due to the size of this molecule.

## Computational References

---

- (1) K. P. Chiang, C. C. Scarborough, M. Horitani, N. S. Lees, K. Ding, T. R. Dugan, W. W. Brennessel, E. Bill, B. M. Hoffman, P. L. Holland, *Angew. Chem. Int. Ed.* **2012**, *51*, in press.
- (2) Neese, F. *ORCA Ab Initio, Density Functional, and Semiempirical Electronic Structure Program Package, version 2.8*, Universität Bonn, Germany, 2011.
- (3) (a) Becke, A. D. *J. Chem. Phys.* **1993**, *98*, 5648. (b) Lee, C. T.; Yang, W. T.; Parr, R. G. *Phys. Rev. B* **1988**, *37*, 785.
- (4) Staroverov, V. N.; Scuseria, G. E.; Tao, J.; Perdew, J. P. *J. Chem. Phys.* **2003**, *119*, 12129.
- (5) Schäfer, A.; Huber, C.; Ahlrichs, R. *J. Chem. Phys.* **1994**, *100*, 5829.
- (6) (a) Becke, A. D. *J. Chem. Phys.* **1993**, *98*, 5648. (b) Lee, C.; Yang, W.; Parr, R. G. *Phys. Chem. B* **1988**, *37*, 785.
- (7) (a) Neese, F. *Inorg. Chim. Acta* **2002**, *337*, 181. (b) Sinnecker, S.; Slep, L. D.; Bill, E.; Neese, F. *Inorg. Chem.* **2005**, *44*, 2245.
- (8) Klamt, A.; Jonas, V.; Bürger, T.; Lohrenz, J. C. W. *J. Phys. Chem. A* **1998**, *102*, 5074.
- (9) (a) Grimme, S., *J. Comput. Chem.* **2004**, *25*, 1463-1476. (b) Grimme, S., *J. Comput. Chem.* **2006**, *27*, 1787-1799. (c) Grimme, S.; Antony, J.; Ehrlich, S.; Krieg, H., *J. Chem. Phys.* **2010**, *132*, 154104.
- (10) (a) Noodleman, L. *J. Chem. Phys.* **1981**, *74*, 5737. (b) Noodleman, L.; Case, D. A.; Aizman, A. *J. Am. Chem. Soc.* **1988**, *110*, 1001. (c) Noodleman, L.; Davidson, E. R. *Chem. Phys.*

---

**1986**, *109*, 131. (d) Noodleman, L.; Norman, J. G.; Osborne, J. H.; Aizman, A.; Case, D. A. *J. Am. Chem. Soc.* **1985**, *107*, 3418. (e) Noodleman, L.; Peng, C. Y.; Case, D. A.; Mouesca, J. M. *Coord. Chem. Rev.* **1995**, *144*, 199.

(11) (a) Yamaguchi, K.; Takahara, Y.; Fueno, T. In *Applied Quantum Chemistry*, Smith, V. H.; Ed.; Reidel: Dordrecht, 1986; p. 155. (b) Soda, T.; Kitagawa, Y.; Onishi, T.; Takano, Y.; Shigeta, Y.; Nagao, H.; Yoshioka, Y.; Yamaguchi, K. *Chem. Phys. Lett.* **2000**, *319*, 223-230. (c) Bencini, A.; Gatteschi, D. *J. Am. Chem. Soc.* **1980**, *108*, 5763.

(12) Römelt, M.; Ye, S.; Neese, F. *Inorg. Chem.* **2009**, *48*, 784.

(13) The TPSSh functional was also found to provide the best calculated Mössbauer parameters for two dinitrosyl iron compounds: Ye, S.; Neese, F. *J. Am. Chem. Soc.* **2010**, *132*, 3646.

REFERENCE NUMBER: holmc10

CRYSTAL STRUCTURE REPORT

$C_{83} H_{112} Fe_2 K_2 N_4 O_{0.50} S$

Or

$[(L^{Meg}Fe)_2(\mu-S)]K_2 \cdot 3.5(C_6H_6) \cdot 0.5(C_4H_{10}O)$

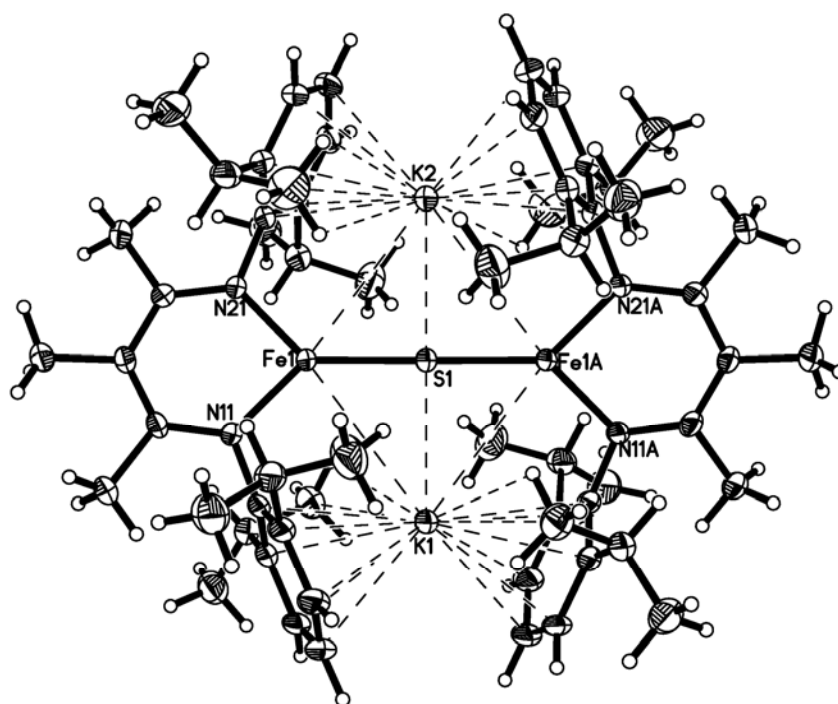

Report prepared for:

Dr. Patrick Holland

Meghan Clark

February 18, 2009

Meghan Clark

X-ray Crystallographic Facility

Department of Chemistry, University of Rochester

120 Trustee Road

Rochester, NY 14627

### Data collection

A crystal (0.36 x 0.28 x 0.14 mm<sup>3</sup>) was placed onto the tip of a 0.1 mm diameter glass capillary tube or fiber and mounted on a Bruker SMART APEX II CCD Platform diffractometer for a data collection at 100.0(1) K.<sup>1</sup> A preliminary set of cell constants and an orientation matrix were calculated from reflections harvested from three orthogonal wedges of reciprocal space. The full data collection was carried out using MoK $\alpha$  radiation (graphite monochromator) with a frame time of 45 seconds and a detector distance of 4.05 cm. A randomly oriented region of reciprocal space was surveyed: four major sections of frames were collected with 0.50° steps in  $\omega$  at four different  $\phi$  settings and a detector position of -38° in  $2\theta$ . The intensity data were corrected for absorption.<sup>2</sup> Final cell constants were calculated from the xyz centroids of 3822 strong reflections from the actual data collection after integration.<sup>3</sup> See Table 1 for additional crystal and refinement information.

### Structure solution and refinement

The structure was solved using SIR97<sup>4</sup> and refined using SHELXL-97.<sup>4</sup> The space group *Pbcn* was determined based on systematic absences and intensity statistics. A direct-methods solution was calculated which provided most non-hydrogen atoms from the E-map. Full-matrix least squares / difference Fourier cycles were performed which located the remaining non-hydrogen atoms. All non-hydrogen atoms were refined with anisotropic displacement parameters. All hydrogen atoms were placed in ideal positions and refined as riding atoms with relative isotropic displacement parameters. Reflection contributions from highly disordered co-crystallized solvent were removed using program PLATON, function SQUEEZE,<sup>6</sup> which determined there to be 693 electrons in 2168 Å<sup>3</sup>. The solvent, which packed in channels parallel to the *c*-axis, could be identified as 3.5 benzene molecules and 0.5 diethyl ether molecules per di-iron molecule. Since the identity of the solvent was known, it was included in the molecular formula but not in the atom list. The final full matrix least squares refinement converged to  $R1 = 0.0645$  ( $F^2$ ,  $I > 2\sigma(I)$ ) and  $wR2 = 0.1921$  ( $F^2$ , all data).

### Structure description

The structure is the one suggested. The di-iron molecule lies on a crystallographic 2-fold axis, coincident with the sulfur and two potassium atoms. The angle between the N-Fe-N and Fe-K-S-K planes is 16.67(5) degrees.

Unless noted otherwise all structural diagrams containing thermal displacement ellipsoids are drawn at the 50 % probability level.

Data collection, structure solution, and structure refinement were conducted at the X-ray Crystallographic Facility, B51 Hutchison Hall, Department of Chemistry, University of Rochester. All publications arising from this report MUST either 1) include Meghan Clark or 2) acknowledge Meghan Clark and the X-ray Crystallographic Facility of the Department of Chemistry at the University of Rochester.

<sup>1</sup> APEX2, version 2009.1-0; Bruker AXS: Madison, WI, 2009.

<sup>2</sup> Sheldrick, G. M. SADABS, version 2008/1; University of Göttingen: Göttingen, Germany, 2008.

<sup>3</sup> SAINT, version 7.60A; Bruker AXS: Madison, WI, 2008.

<sup>4</sup> Sheldrick, G. M. *Acta. Cryst.* **2008**, A64, 112-122.

<sup>5</sup> Altomare, A.; Burla, M. C.; Camalli, M.; Cascarano, G. L.; Giacovazzo, C.; Guagliardi, A.; Moliterni, A. G. G.; Polidori, G.; Spagna, R. *SIR97: A new program for solving and refining crystal structures*; Istituto di Cristallografia, CNR: Bari, Italy, 1999.

<sup>6</sup> Spek, A. L. *PLATON: A multipurpose crystallographic tool*, version 300106; Utrecht University: Utrecht, The Netherlands, 2006.

Some equations of interest:

$$R_{\text{int}} = \Sigma |F_o^2 - \langle F_o^2 \rangle| / \Sigma |F_o^2|$$

$$R1 = \Sigma ||F_o| - |F_c|| / \Sigma |F_o|$$

$$wR2 = [\Sigma [w(F_o^2 - F_c^2)^2] / \Sigma [w(F_o^2)^2]]^{1/2}$$

where  $w = 1 / [\sigma^2(F_o^2) + (aP)^2 + bP]$  and

$$P = 1/3 \max(0, F_o^2) + 2/3 F_c^2$$

$$\text{GOF} = S = [\Sigma [w(F_o^2 - F_c^2)^2] / (m - n)]^{1/2}$$

where  $m$  = number of reflections and  $n$  = number of parameters

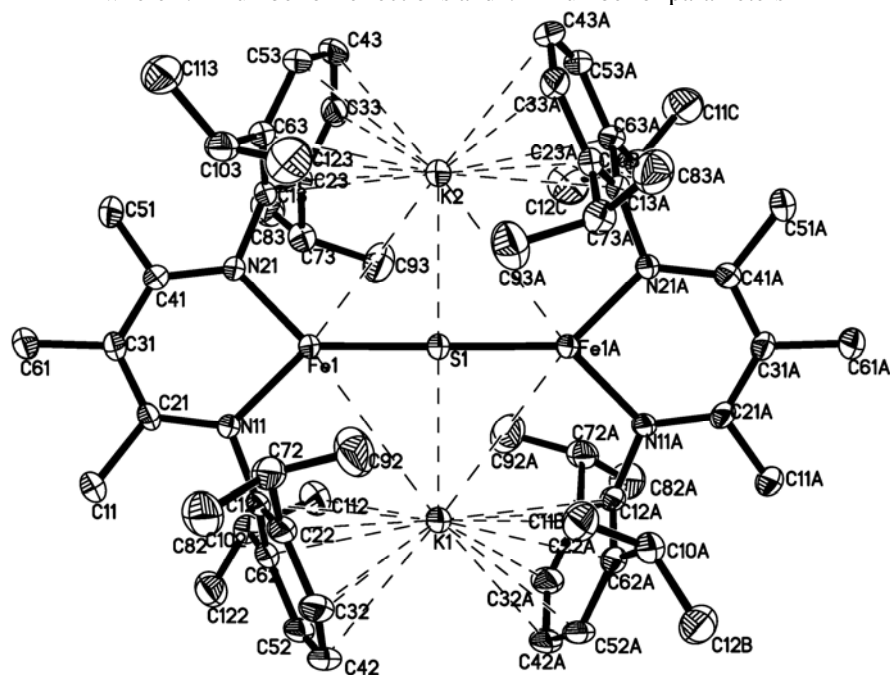

Table 1. Crystal data and structure refinement for holmc10.

|                                                     |                                                                    |                     |
|-----------------------------------------------------|--------------------------------------------------------------------|---------------------|
| Identification code                                 | holmc10                                                            |                     |
| Empirical formula                                   | C83 H112 Fe2 K2 N4 O0.50 S                                         |                     |
| Formula weight                                      | 1395.73                                                            |                     |
| Temperature                                         | 100.0(1) K                                                         |                     |
| Wavelength                                          | 0.71073 Å                                                          |                     |
| Crystal system                                      | Orthorhombic                                                       |                     |
| Space group                                         | <i>Pbcn</i>                                                        |                     |
| Unit cell dimensions                                | $a = 14.703(7)$ Å                                                  | $\alpha = 90^\circ$ |
|                                                     | $b = 28.746(14)$ Å                                                 | $\beta = 90^\circ$  |
|                                                     | $c = 17.341(10)$ Å                                                 | $\gamma = 90^\circ$ |
| Volume                                              | 7330(6) Å <sup>3</sup>                                             |                     |
| Z                                                   | 4                                                                  |                     |
| Density (calculated)                                | 1.265 Mg/m <sup>3</sup>                                            |                     |
| Absorption coefficient                              | 0.586 mm <sup>-1</sup>                                             |                     |
| <i>F</i> (000)                                      | 2992                                                               |                     |
| Crystal color, morphology                           | Green-black, Block                                                 |                     |
| Crystal size                                        | 0.36 x 0.28 x 0.14 mm <sup>3</sup>                                 |                     |
| Theta range for data collection                     | 1.84 to 33.14°                                                     |                     |
| Index ranges                                        | $-22 \leq h \leq 22$ , $-44 \leq k \leq 44$ , $-26 \leq l \leq 26$ |                     |
| Reflections collected                               | 133922                                                             |                     |
| Independent reflections                             | 13994 [ <i>R</i> (int) = 0.1062]                                   |                     |
| Observed reflections                                | 7828                                                               |                     |
| Completeness to theta = 33.14°                      | 100.0%                                                             |                     |
| Absorption correction                               | Multi-scan                                                         |                     |
| Max. and min. transmission                          | 0.9225 and 0.8169                                                  |                     |
| Refinement method                                   | Full-matrix least-squares on <i>F</i> <sup>2</sup>                 |                     |
| Data / restraints / parameters                      | 13994 / 0 / 324                                                    |                     |
| Goodness-of-fit on <i>F</i> <sup>2</sup>            | 1.018                                                              |                     |
| Final <i>R</i> indices [ <i>I</i> > 2σ( <i>I</i> )] | <i>R</i> 1 = 0.0645, <i>wR</i> 2 = 0.1750                          |                     |
| <i>R</i> indices (all data)                         | <i>R</i> 1 = 0.1057, <i>wR</i> 2 = 0.1921                          |                     |
| Largest diff. peak and hole                         | 0.941 and -0.494 e.Å <sup>-3</sup>                                 |                     |

Table 2. Atomic coordinates ( $\times 10^4$ ) and equivalent isotropic displacement parameters ( $\text{\AA}^2 \times 10^3$ ) for holmc10.  $U_{\text{eq}}$  is defined as one third of the trace of the orthogonalized  $U_{ij}$  tensor.

|      | x       | y       | z       | $U_{\text{eq}}$ |
|------|---------|---------|---------|-----------------|
| Fe1  | 4802(1) | 3089(1) | 6257(1) | 27(1)           |
| K1   | 5000    | 4111(1) | 7500    | 33(1)           |
| K2   | 5000    | 2070(1) | 7500    | 32(1)           |
| S1   | 5000    | 3091(1) | 7500    | 38(1)           |
| N11  | 4943(1) | 3555(1) | 5472(1) | 28(1)           |
| N21  | 4405(1) | 2625(1) | 5538(1) | 25(1)           |
| C11  | 5067(2) | 3900(1) | 4185(1) | 35(1)           |
| C21  | 4825(2) | 3497(1) | 4710(1) | 27(1)           |
| C31  | 4508(2) | 3088(1) | 4379(1) | 24(1)           |
| C41  | 4285(2) | 2678(1) | 4776(1) | 25(1)           |
| C51  | 3895(2) | 2278(1) | 4329(1) | 34(1)           |
| C61  | 4417(2) | 3073(1) | 3518(1) | 33(1)           |
| C12  | 5163(2) | 4002(1) | 5749(1) | 28(1)           |
| C22  | 6056(2) | 4113(1) | 5937(1) | 31(1)           |
| C32  | 6248(2) | 4547(1) | 6245(1) | 34(1)           |
| C42  | 5578(2) | 4872(1) | 6359(1) | 35(1)           |
| C52  | 4710(2) | 4764(1) | 6160(1) | 33(1)           |
| C62  | 4468(2) | 4334(1) | 5858(1) | 31(1)           |
| C72  | 6824(2) | 3778(1) | 5789(1) | 35(1)           |
| C82  | 7480(2) | 3968(1) | 5194(2) | 46(1)           |
| C92  | 7321(2) | 3652(1) | 6518(2) | 60(1)           |
| C102 | 3496(2) | 4218(1) | 5687(1) | 33(1)           |
| C112 | 3026(2) | 4047(1) | 6410(1) | 42(1)           |
| C122 | 2982(2) | 4617(1) | 5334(1) | 43(1)           |
| C13  | 4284(2) | 2173(1) | 5851(1) | 24(1)           |
| C23  | 3487(2) | 2060(1) | 6240(1) | 27(1)           |
| C33  | 3420(2) | 1625(1) | 6587(1) | 31(1)           |
| C43  | 4110(2) | 1306(1) | 6536(1) | 35(1)           |
| C53  | 4880(2) | 1415(1) | 6139(1) | 31(1)           |
| C63  | 4987(2) | 1848(1) | 5790(1) | 28(1)           |
| C73  | 2702(2) | 2392(1) | 6291(1) | 32(1)           |

|      |         |         |         |       |
|------|---------|---------|---------|-------|
| C83  | 1837(2) | 2181(1) | 5962(2) | 45(1) |
| C93  | 2532(2) | 2550(1) | 7115(2) | 48(1) |
| C103 | 5861(2) | 1964(1) | 5391(1) | 36(1) |
| C113 | 6177(2) | 1586(1) | 4840(2) | 50(1) |
| C123 | 6594(2) | 2070(1) | 5977(2) | 52(1) |

---

Table 3. Bond lengths [ $\text{\AA}$ ] and angles [ $^\circ$ ] for holmc10.

|              |            |              |          |
|--------------|------------|--------------|----------|
| Fe(1)-N(21)  | 1.9166(17) | C(11)-C(21)  | 1.517(3) |
| Fe(1)-N(11)  | 1.9210(18) | C(11)-H(11A) | 0.9800   |
| Fe(1)-S(1)   | 2.1745(13) | C(11)-H(11B) | 0.9800   |
| Fe(1)-K(2)   | 3.6490(14) | C(11)-H(11C) | 0.9800   |
| Fe(1)-K(1)   | 3.6548(14) | C(21)-C(31)  | 1.388(3) |
| K(1)-S(1)    | 2.9318(17) | C(31)-C(41)  | 1.404(3) |
| K(1)-C(52)#1 | 3.017(2)   | C(31)-C(61)  | 1.499(3) |
| K(1)-C(52)   | 3.017(2)   | C(41)-C(51)  | 1.502(3) |
| K(1)-C(62)#1 | 3.022(2)   | C(51)-H(51A) | 0.9800   |
| K(1)-C(62)   | 3.022(2)   | C(51)-H(51B) | 0.9800   |
| K(1)-C(12)   | 3.062(3)   | C(51)-H(51C) | 0.9800   |
| K(1)-C(12)#1 | 3.062(3)   | C(61)-H(61A) | 0.9800   |
| K(1)-C(42)#1 | 3.069(2)   | C(61)-H(61B) | 0.9800   |
| K(1)-C(42)   | 3.069(2)   | C(61)-H(61C) | 0.9800   |
| K(1)-C(32)#1 | 3.110(2)   | C(12)-C(22)  | 1.390(3) |
| K(1)-C(32)   | 3.110(2)   | C(12)-C(62)  | 1.412(3) |
| K(1)-C(22)#1 | 3.125(2)   | C(22)-C(32)  | 1.387(3) |
| K(2)-S(1)    | 2.9360(17) | C(22)-C(72)  | 1.506(3) |
| K(2)-C(53)#1 | 3.025(2)   | C(32)-C(42)  | 1.372(3) |
| K(2)-C(53)   | 3.025(2)   | C(32)-H(32A) | 0.9500   |
| K(2)-C(63)   | 3.032(3)   | C(42)-C(52)  | 1.358(4) |
| K(2)-C(63)#1 | 3.032(3)   | C(42)-H(42A) | 0.9500   |
| K(2)-C(43)#1 | 3.053(2)   | C(52)-C(62)  | 1.391(3) |
| K(2)-C(43)   | 3.053(2)   | C(52)-H(52A) | 0.9500   |
| K(2)-C(13)   | 3.062(2)   | C(62)-C(102) | 1.496(4) |
| K(2)-C(13)#1 | 3.062(2)   | C(72)-C(92)  | 1.505(4) |
| K(2)-C(33)#1 | 3.089(2)   | C(72)-C(82)  | 1.514(3) |
| K(2)-C(33)   | 3.089(2)   | C(72)-H(72A) | 1.0000   |
| K(2)-C(23)#1 | 3.119(2)   | C(82)-H(82A) | 0.9800   |
| S(1)-Fe(1)#1 | 2.1745(13) | C(82)-H(82B) | 0.9800   |
| N(11)-C(21)  | 1.344(3)   | C(82)-H(82C) | 0.9800   |
| N(11)-C(12)  | 1.408(3)   | C(92)-H(92A) | 0.9800   |
| N(21)-C(41)  | 1.343(2)   | C(92)-H(92B) | 0.9800   |
| N(21)-C(13)  | 1.419(2)   | C(92)-H(92C) | 0.9800   |

|               |          |                      |           |
|---------------|----------|----------------------|-----------|
| C(102)-C(122) | 1.504(3) | C(123)-H(12E)        | 0.9800    |
| C(102)-C(112) | 1.514(3) | C(123)-H(12F)        | 0.9800    |
| C(102)-H(10A) | 1.0000   |                      |           |
| C(112)-H(11D) | 0.9800   | N(21)-Fe(1)-N(11)    | 93.29(8)  |
| C(112)-H(11E) | 0.9800   | N(21)-Fe(1)-S(1)     | 133.41(5) |
| C(112)-H(11F) | 0.9800   | N(11)-Fe(1)-S(1)     | 133.30(6) |
| C(122)-H(12A) | 0.9800   | N(21)-Fe(1)-K(2)     | 81.36(6)  |
| C(122)-H(12B) | 0.9800   | N(11)-Fe(1)-K(2)     | 165.88(6) |
| C(122)-H(12C) | 0.9800   | S(1)-Fe(1)-K(2)      | 53.57(3)  |
| C(13)-C(23)   | 1.392(3) | N(21)-Fe(1)-K(1)     | 165.25(6) |
| C(13)-C(63)   | 1.396(3) | N(11)-Fe(1)-K(1)     | 81.29(6)  |
| C(23)-C(33)   | 1.390(3) | S(1)-Fe(1)-K(1)      | 53.34(3)  |
| C(23)-C(73)   | 1.499(3) | K(2)-Fe(1)-K(1)      | 106.91(4) |
| C(33)-C(43)   | 1.371(3) | S(1)-K(1)-C(52)#1    | 128.48(4) |
| C(33)-H(33A)  | 0.9500   | S(1)-K(1)-C(52)      | 128.48(4) |
| C(43)-C(53)   | 1.362(3) | C(52)#1-K(1)-C(52)   | 103.04(9) |
| C(43)-H(43A)  | 0.9500   | S(1)-K(1)-C(62)#1    | 102.22(4) |
| C(53)-C(63)   | 1.394(3) | C(52)#1-K(1)-C(62)#1 | 26.63(6)  |
| C(53)-H(53A)  | 0.9500   | C(52)-K(1)-C(62)#1   | 129.09(7) |
| C(63)-C(103)  | 1.497(3) | S(1)-K(1)-C(62)      | 102.22(4) |
| C(73)-C(83)   | 1.519(3) | C(52)#1-K(1)-C(62)   | 129.09(7) |
| C(73)-C(93)   | 1.520(3) | C(52)-K(1)-C(62)     | 26.63(6)  |
| C(73)-H(73A)  | 1.0000   | C(62)#1-K(1)-C(62)   | 155.57(8) |
| C(83)-H(83A)  | 0.9800   | S(1)-K(1)-C(12)      | 84.10(4)  |
| C(83)-H(83B)  | 0.9800   | C(52)#1-K(1)-C(12)   | 144.71(6) |
| C(83)-H(83C)  | 0.9800   | C(52)-K(1)-C(12)     | 46.50(6)  |
| C(93)-H(93A)  | 0.9800   | C(62)#1-K(1)-C(12)   | 159.38(7) |
| C(93)-H(93B)  | 0.9800   | C(62)-K(1)-C(12)     | 26.82(6)  |
| C(93)-H(93C)  | 0.9800   | S(1)-K(1)-C(12)#1    | 84.10(4)  |
| C(103)-C(123) | 1.512(4) | C(52)#1-K(1)-C(12)#1 | 46.50(6)  |
| C(103)-C(113) | 1.519(3) | C(52)-K(1)-C(12)#1   | 144.71(6) |
| C(103)-H(10B) | 1.0000   | C(62)#1-K(1)-C(12)#1 | 26.82(6)  |
| C(113)-H(11G) | 0.9800   | C(62)-K(1)-C(12)#1   | 159.38(7) |
| C(113)-H(11H) | 0.9800   | C(12)-K(1)-C(12)#1   | 168.20(7) |
| C(113)-H(11I) | 0.9800   | S(1)-K(1)-C(42)#1    | 135.43(5) |
| C(123)-H(12D) | 0.9800   | C(52)#1-K(1)-C(42)#1 | 25.77(7)  |

|                      |           |                      |           |
|----------------------|-----------|----------------------|-----------|
| C(52)-K(1)-C(42)#1   | 90.80(7)  | C(62)-K(1)-C(22)#1   | 133.52(7) |
| C(62)#1-K(1)-C(42)#1 | 46.63(7)  | C(12)-K(1)-C(22)#1   | 154.10(7) |
| C(62)-K(1)-C(42)#1   | 112.66(7) | C(12)#1-K(1)-C(22)#1 | 25.94(6)  |
| C(12)-K(1)-C(42)#1   | 137.25(6) | C(42)#1-K(1)-C(22)#1 | 45.71(6)  |
| C(12)#1-K(1)-C(42)#1 | 53.99(6)  | C(42)-K(1)-C(22)#1   | 134.11(6) |
| S(1)-K(1)-C(42)      | 135.43(5) | C(32)#1-K(1)-C(22)#1 | 25.70(5)  |
| C(52)#1-K(1)-C(42)   | 90.80(7)  | C(32)-K(1)-C(22)#1   | 154.14(6) |
| C(52)-K(1)-C(42)     | 25.77(7)  | S(1)-K(2)-C(53)#1    | 128.50(4) |
| C(62)#1-K(1)-C(42)   | 112.66(7) | S(1)-K(2)-C(53)      | 128.50(4) |
| C(62)-K(1)-C(42)     | 46.62(7)  | C(53)#1-K(2)-C(53)   | 103.01(9) |
| C(12)-K(1)-C(42)     | 53.99(6)  | S(1)-K(2)-C(63)      | 102.12(4) |
| C(12)#1-K(1)-C(42)   | 137.25(6) | C(53)#1-K(2)-C(63)   | 129.25(7) |
| C(42)#1-K(1)-C(42)   | 89.14(9)  | C(53)-K(2)-C(63)     | 26.61(5)  |
| S(1)-K(1)-C(32)#1    | 113.75(4) | S(1)-K(2)-C(63)#1    | 102.12(4) |
| C(52)#1-K(1)-C(32)#1 | 45.11(7)  | C(53)#1-K(2)-C(63)#1 | 26.61(5)  |
| C(52)-K(1)-C(32)#1   | 101.80(7) | C(53)-K(2)-C(63)#1   | 129.26(7) |
| C(62)#1-K(1)-C(32)#1 | 53.72(7)  | C(63)-K(2)-C(63)#1   | 155.76(8) |
| C(62)-K(1)-C(32)#1   | 114.92(7) | S(1)-K(2)-C(43)#1    | 135.97(5) |
| C(12)-K(1)-C(32)#1   | 141.40(7) | C(53)#1-K(2)-C(43)#1 | 25.90(6)  |
| C(12)#1-K(1)-C(32)#1 | 45.67(6)  | C(53)-K(2)-C(43)#1   | 90.26(7)  |
| C(42)#1-K(1)-C(32)#1 | 25.65(6)  | C(63)-K(2)-C(43)#1   | 112.75(6) |
| C(42)-K(1)-C(32)#1   | 109.13(7) | C(63)#1-K(2)-C(43)#1 | 46.48(6)  |
| S(1)-K(1)-C(32)      | 113.75(4) | S(1)-K(2)-C(43)      | 135.97(5) |
| C(52)#1-K(1)-C(32)   | 101.80(7) | C(53)#1-K(2)-C(43)   | 90.25(7)  |
| C(52)-K(1)-C(32)     | 45.11(7)  | C(53)-K(2)-C(43)     | 25.90(7)  |
| C(62)#1-K(1)-C(32)   | 114.92(7) | C(63)-K(2)-C(43)     | 46.48(6)  |
| C(62)-K(1)-C(32)     | 53.72(7)  | C(63)#1-K(2)-C(43)   | 112.75(6) |
| C(12)-K(1)-C(32)     | 45.67(6)  | C(43)#1-K(2)-C(43)   | 88.05(9)  |
| C(12)#1-K(1)-C(32)   | 141.40(7) | S(1)-K(2)-C(13)      | 84.43(4)  |
| C(42)#1-K(1)-C(32)   | 109.13(7) | C(53)#1-K(2)-C(13)   | 144.04(6) |
| C(42)-K(1)-C(32)     | 25.65(6)  | C(53)-K(2)-C(13)     | 46.48(6)  |
| C(32)#1-K(1)-C(32)   | 132.51(9) | C(63)-K(2)-C(13)     | 26.49(6)  |
| S(1)-K(1)-C(22)#1    | 90.09(4)  | C(63)#1-K(2)-C(13)   | 159.35(6) |
| C(52)#1-K(1)-C(22)#1 | 53.23(7)  | C(43)#1-K(2)-C(13)   | 136.73(6) |
| C(52)-K(1)-C(22)#1   | 126.63(7) | C(43)-K(2)-C(13)     | 53.94(6)  |
| C(62)#1-K(1)-C(22)#1 | 46.42(7)  | S(1)-K(2)-C(13)#1    | 84.43(4)  |

|                      |           |                     |            |
|----------------------|-----------|---------------------|------------|
| C(53)#1-K(2)-C(13)#1 | 46.48(6)  | C(33)-K(2)-C(23)#1  | 153.17(6)  |
| C(53)-K(2)-C(13)#1   | 144.04(6) | Fe(1)#1-S(1)-Fe(1)  | 179.70(4)  |
| C(63)-K(2)-C(13)#1   | 159.36(6) | Fe(1)#1-S(1)-K(1)   | 90.15(2)   |
| C(63)#1-K(2)-C(13)#1 | 26.49(6)  | Fe(1)-S(1)-K(1)     | 90.15(2)   |
| C(43)#1-K(2)-C(13)#1 | 53.95(6)  | Fe(1)#1-S(1)-K(2)   | 89.85(2)   |
| C(43)-K(2)-C(13)#1   | 136.73(6) | Fe(1)-S(1)-K(2)     | 89.85(2)   |
| C(13)-K(2)-C(13)#1   | 168.86(7) | K(1)-S(1)-K(2)      | 180.0      |
| S(1)-K(2)-C(33)#1    | 114.43(4) | C(21)-N(11)-C(12)   | 118.59(16) |
| C(53)#1-K(2)-C(33)#1 | 45.45(7)  | C(21)-N(11)-Fe(1)   | 126.58(14) |
| C(53)-K(2)-C(33)#1   | 100.75(6) | C(12)-N(11)-Fe(1)   | 114.80(13) |
| C(63)-K(2)-C(33)#1   | 114.79(6) | C(41)-N(21)-C(13)   | 117.61(15) |
| C(63)#1-K(2)-C(33)#1 | 53.64(6)  | C(41)-N(21)-Fe(1)   | 126.97(13) |
| C(43)#1-K(2)-C(33)#1 | 25.80(6)  | C(13)-N(21)-Fe(1)   | 115.29(12) |
| C(43)-K(2)-C(33)#1   | 107.79(7) | C(21)-C(11)-H(11A)  | 109.5      |
| C(13)-K(2)-C(33)#1   | 141.05(6) | C(21)-C(11)-H(11B)  | 109.5      |
| C(13)#1-K(2)-C(33)#1 | 45.79(5)  | H(11A)-C(11)-H(11B) | 109.5      |
| S(1)-K(2)-C(33)      | 114.43(4) | C(21)-C(11)-H(11C)  | 109.5      |
| C(53)#1-K(2)-C(33)   | 100.75(6) | H(11A)-C(11)-H(11C) | 109.5      |
| C(53)-K(2)-C(33)     | 45.45(7)  | H(11B)-C(11)-H(11C) | 109.5      |
| C(63)-K(2)-C(33)     | 53.63(6)  | N(11)-C(21)-C(31)   | 123.81(17) |
| C(63)#1-K(2)-C(33)   | 114.79(6) | N(11)-C(21)-C(11)   | 117.69(18) |
| C(43)#1-K(2)-C(33)   | 107.79(7) | C(31)-C(21)-C(11)   | 118.49(17) |
| C(43)-K(2)-C(33)     | 25.79(6)  | C(21)-C(31)-C(41)   | 125.83(17) |
| C(13)-K(2)-C(33)     | 45.79(5)  | C(21)-C(31)-C(61)   | 117.87(17) |
| C(13)#1-K(2)-C(33)   | 141.05(6) | C(41)-C(31)-C(61)   | 116.28(17) |
| C(33)#1-K(2)-C(33)   | 131.13(9) | N(21)-C(41)-C(31)   | 123.24(17) |
| S(1)-K(2)-C(23)#1    | 90.51(4)  | N(21)-C(41)-C(51)   | 118.07(17) |
| C(53)#1-K(2)-C(23)#1 | 53.57(6)  | C(31)-C(41)-C(51)   | 118.69(17) |
| C(53)-K(2)-C(23)#1   | 125.65(6) | C(41)-C(51)-H(51A)  | 109.5      |
| C(63)-K(2)-C(23)#1   | 133.44(6) | C(41)-C(51)-H(51B)  | 109.5      |
| C(63)#1-K(2)-C(23)#1 | 46.27(6)  | H(51A)-C(51)-H(51B) | 109.5      |
| C(43)#1-K(2)-C(23)#1 | 45.94(6)  | C(41)-C(51)-H(51C)  | 109.5      |
| C(43)-K(2)-C(23)#1   | 133.05(6) | H(51A)-C(51)-H(51C) | 109.5      |
| C(13)-K(2)-C(23)#1   | 154.21(6) | H(51B)-C(51)-H(51C) | 109.5      |
| C(13)#1-K(2)-C(23)#1 | 26.01(6)  | C(31)-C(61)-H(61A)  | 109.5      |
| C(33)#1-K(2)-C(23)#1 | 25.88(5)  | C(31)-C(61)-H(61B)  | 109.5      |

|                     |            |                      |            |
|---------------------|------------|----------------------|------------|
| H(61A)-C(61)-H(61B) | 109.5      | C(12)-C(62)-C(102)   | 120.99(19) |
| C(31)-C(61)-H(61C)  | 109.5      | C(52)-C(62)-K(1)     | 76.52(12)  |
| H(61A)-C(61)-H(61C) | 109.5      | C(12)-C(62)-K(1)     | 78.20(11)  |
| H(61B)-C(61)-H(61C) | 109.5      | C(102)-C(62)-K(1)    | 112.76(12) |
| C(22)-C(12)-N(11)   | 120.46(19) | C(92)-C(72)-C(22)    | 111.96(19) |
| C(22)-C(12)-C(62)   | 119.84(19) | C(92)-C(72)-C(82)    | 110.5(3)   |
| N(11)-C(12)-C(62)   | 119.7(2)   | C(22)-C(72)-C(82)    | 111.3(2)   |
| C(22)-C(12)-K(1)    | 79.53(11)  | C(92)-C(72)-H(72A)   | 107.6      |
| N(11)-C(12)-K(1)    | 114.40(11) | C(22)-C(72)-H(72A)   | 107.6      |
| C(62)-C(12)-K(1)    | 74.98(11)  | C(82)-C(72)-H(72A)   | 107.6      |
| C(32)-C(22)-C(12)   | 119.3(2)   | C(72)-C(82)-H(82A)   | 109.5      |
| C(32)-C(22)-C(72)   | 119.3(2)   | C(72)-C(82)-H(82B)   | 109.5      |
| C(12)-C(22)-C(72)   | 121.38(19) | H(82A)-C(82)-H(82B)  | 109.5      |
| C(32)-C(22)-K(1)    | 76.58(12)  | C(72)-C(82)-H(82C)   | 109.5      |
| C(12)-C(22)-K(1)    | 74.53(11)  | H(82A)-C(82)-H(82C)  | 109.5      |
| C(72)-C(22)-K(1)    | 121.29(13) | H(82B)-C(82)-H(82C)  | 109.5      |
| C(42)-C(32)-C(22)   | 121.4(2)   | C(72)-C(92)-H(92A)   | 109.5      |
| C(42)-C(32)-K(1)    | 75.47(13)  | C(72)-C(92)-H(92B)   | 109.5      |
| C(22)-C(32)-K(1)    | 77.72(12)  | H(92A)-C(92)-H(92B)  | 109.5      |
| C(42)-C(32)-H(32A)  | 119.3      | C(72)-C(92)-H(92C)   | 109.5      |
| C(22)-C(32)-H(32A)  | 119.3      | H(92A)-C(92)-H(92C)  | 109.5      |
| K(1)-C(32)-H(32A)   | 118.3      | H(92B)-C(92)-H(92C)  | 109.5      |
| C(52)-C(42)-C(32)   | 119.0(2)   | C(62)-C(102)-C(122)  | 113.1(2)   |
| C(52)-C(42)-K(1)    | 75.01(12)  | C(62)-C(102)-C(112)  | 110.11(19) |
| C(32)-C(42)-K(1)    | 78.88(12)  | C(122)-C(102)-C(112) | 110.8(2)   |
| C(52)-C(42)-H(42A)  | 120.5      | C(62)-C(102)-H(10A)  | 107.6      |
| C(32)-C(42)-H(42A)  | 120.5      | C(122)-C(102)-H(10A) | 107.6      |
| K(1)-C(42)-H(42A)   | 116.4      | C(112)-C(102)-H(10A) | 107.6      |
| C(42)-C(52)-C(62)   | 122.6(2)   | C(102)-C(112)-H(11D) | 109.5      |
| C(42)-C(52)-K(1)    | 79.22(13)  | C(102)-C(112)-H(11E) | 109.5      |
| C(62)-C(52)-K(1)    | 76.85(12)  | H(11D)-C(112)-H(11E) | 109.5      |
| C(42)-C(52)-H(52A)  | 118.7      | C(102)-C(112)-H(11F) | 109.5      |
| C(62)-C(52)-H(52A)  | 118.7      | H(11D)-C(112)-H(11F) | 109.5      |
| K(1)-C(52)-H(52A)   | 115.5      | H(11E)-C(112)-H(11F) | 109.5      |
| C(52)-C(62)-C(12)   | 117.8(2)   | C(102)-C(122)-H(12A) | 109.5      |
| C(52)-C(62)-C(102)  | 121.1(2)   | C(102)-C(122)-H(12B) | 109.5      |

|                      |            |                      |            |
|----------------------|------------|----------------------|------------|
| H(12A)-C(122)-H(12B) | 109.5      | C(13)-C(63)-C(103)   | 121.43(18) |
| C(102)-C(122)-H(12C) | 109.5      | C(53)-C(63)-K(2)     | 76.39(12)  |
| H(12A)-C(122)-H(12C) | 109.5      | C(13)-C(63)-K(2)     | 77.95(11)  |
| H(12B)-C(122)-H(12C) | 109.5      | C(103)-C(63)-K(2)    | 113.59(15) |
| C(23)-C(13)-C(63)    | 120.23(18) | C(23)-C(73)-C(83)    | 111.6(2)   |
| C(23)-C(13)-N(21)    | 120.26(18) | C(23)-C(73)-C(93)    | 111.83(19) |
| C(63)-C(13)-N(21)    | 119.46(19) | C(83)-C(73)-C(93)    | 109.5(2)   |
| C(23)-C(13)-K(2)     | 79.25(11)  | C(23)-C(73)-H(73A)   | 107.9      |
| C(63)-C(13)-K(2)     | 75.56(11)  | C(83)-C(73)-H(73A)   | 107.9      |
| N(21)-C(13)-K(2)     | 113.73(11) | C(93)-C(73)-H(73A)   | 107.9      |
| C(33)-C(23)-C(13)    | 118.6(2)   | C(73)-C(83)-H(83A)   | 109.5      |
| C(33)-C(23)-C(73)    | 119.5(2)   | C(73)-C(83)-H(83B)   | 109.5      |
| C(13)-C(23)-C(73)    | 121.91(18) | H(83A)-C(83)-H(83B)  | 109.5      |
| C(33)-C(23)-K(2)     | 75.86(12)  | C(73)-C(83)-H(83C)   | 109.5      |
| C(13)-C(23)-K(2)     | 74.73(12)  | H(83A)-C(83)-H(83C)  | 109.5      |
| C(73)-C(23)-K(2)     | 120.16(13) | H(83B)-C(83)-H(83C)  | 109.5      |
| C(43)-C(33)-C(23)    | 121.5(2)   | C(73)-C(93)-H(93A)   | 109.5      |
| C(43)-C(33)-K(2)     | 75.66(13)  | C(73)-C(93)-H(93B)   | 109.5      |
| C(23)-C(33)-K(2)     | 78.26(12)  | H(93A)-C(93)-H(93B)  | 109.5      |
| C(43)-C(33)-H(33A)   | 119.3      | C(73)-C(93)-H(93C)   | 109.5      |
| C(23)-C(33)-H(33A)   | 119.3      | H(93A)-C(93)-H(93C)  | 109.5      |
| K(2)-C(33)-H(33A)    | 117.5      | H(93B)-C(93)-H(93C)  | 109.5      |
| C(53)-C(43)-C(33)    | 119.59(19) | C(63)-C(103)-C(123)  | 110.3(2)   |
| C(53)-C(43)-K(2)     | 75.87(13)  | C(63)-C(103)-C(113)  | 113.3(2)   |
| C(33)-C(43)-K(2)     | 78.54(13)  | C(123)-C(103)-C(113) | 110.4(2)   |
| C(53)-C(43)-H(43A)   | 120.2      | C(63)-C(103)-H(10B)  | 107.5      |
| C(33)-C(43)-H(43A)   | 120.2      | C(123)-C(103)-H(10B) | 107.5      |
| K(2)-C(43)-H(43A)    | 116.1      | C(113)-C(103)-H(10B) | 107.5      |
| C(43)-C(53)-C(63)    | 121.2(2)   | C(103)-C(113)-H(11G) | 109.5      |
| C(43)-C(53)-K(2)     | 78.23(13)  | C(103)-C(113)-H(11H) | 109.5      |
| C(63)-C(53)-K(2)     | 77.01(12)  | H(11G)-C(113)-H(11H) | 109.5      |
| C(43)-C(53)-H(53A)   | 119.4      | C(103)-C(113)-H(11I) | 109.5      |
| C(63)-C(53)-H(53A)   | 119.4      | H(11G)-C(113)-H(11I) | 109.5      |
| K(2)-C(53)-H(53A)    | 115.9      | H(11H)-C(113)-H(11I) | 109.5      |
| C(53)-C(63)-C(13)    | 118.8(2)   | C(103)-C(123)-H(12D) | 109.5      |
| C(53)-C(63)-C(103)   | 119.7(2)   | C(103)-C(123)-H(12E) | 109.5      |

|                      |       |                      |       |
|----------------------|-------|----------------------|-------|
| H(12D)-C(123)-H(12E) | 109.5 | H(12D)-C(123)-H(12F) | 109.5 |
| C(103)-C(123)-H(12F) | 109.5 | H(12E)-C(123)-H(12F) | 109.5 |

---

Symmetry transformations used to generate equivalent atoms:

#1  $-x+1, y, -z+3/2$

Table 4. Anisotropic displacement parameters ( $\text{\AA}^2 \times 10^3$ ) for holmc10. The anisotropic displacement factor exponent takes the form:  $-2\pi^2 [h^2 a^{*2} U_{11} + \dots + 2 h k a^* b^* U_{12}]$

|      | $U_{11}$ | $U_{22}$ | $U_{33}$ | $U_{23}$ | $U_{13}$ | $U_{12}$ |
|------|----------|----------|----------|----------|----------|----------|
| Fe1  | 53(1)    | 15(1)    | 13(1)    | 0(1)     | 3(1)     | -2(1)    |
| K1   | 62(1)    | 19(1)    | 17(1)    | 0        | 4(1)     | 0        |
| K2   | 54(1)    | 21(1)    | 20(1)    | 0        | -9(1)    | 0        |
| S1   | 81(1)    | 18(1)    | 14(1)    | 0        | 1(1)     | 0        |
| N11  | 53(1)    | 16(1)    | 14(1)    | -1(1)    | 6(1)     | 0(1)     |
| N21  | 44(1)    | 17(1)    | 14(1)    | 0(1)     | 1(1)     | -1(1)    |
| C11  | 59(2)    | 25(1)    | 19(1)    | 5(1)     | 4(1)     | -1(1)    |
| C21  | 44(1)    | 22(1)    | 15(1)    | 4(1)     | 5(1)     | 5(1)     |
| C31  | 35(1)    | 23(1)    | 15(1)    | 3(1)     | 0(1)     | 4(1)     |
| C41  | 36(1)    | 19(1)    | 19(1)    | -1(1)    | 1(1)     | 2(1)     |
| C51  | 55(2)    | 29(1)    | 18(1)    | -1(1)    | -4(1)    | -4(1)    |
| C61  | 53(1)    | 27(1)    | 20(1)    | 3(1)     | -3(1)    | -7(1)    |
| C12  | 50(1)    | 17(1)    | 16(1)    | 3(1)     | 8(1)     | -2(1)    |
| C22  | 51(1)    | 20(1)    | 22(1)    | 1(1)     | 11(1)    | -2(1)    |
| C32  | 51(1)    | 21(1)    | 32(1)    | 1(1)     | 9(1)     | -7(1)    |
| C42  | 59(2)    | 15(1)    | 31(1)    | 0(1)     | 4(1)     | -6(1)    |
| C52  | 58(2)    | 14(1)    | 27(1)    | 1(1)     | 7(1)     | 5(1)     |
| C62  | 56(1)    | 20(1)    | 16(1)    | 3(1)     | 5(1)     | 1(1)     |
| C72  | 50(1)    | 27(1)    | 28(1)    | -2(1)    | 16(1)    | -1(1)    |
| C82  | 50(2)    | 48(2)    | 40(1)    | 4(1)     | 16(1)    | -2(1)    |
| C92  | 85(2)    | 57(2)    | 36(1)    | 6(1)     | 14(1)    | 32(2)    |
| C102 | 52(2)    | 26(1)    | 22(1)    | -1(1)    | 2(1)     | 1(1)     |
| C112 | 54(2)    | 40(1)    | 31(1)    | 5(1)     | 4(1)     | -7(1)    |
| C122 | 56(2)    | 39(1)    | 34(1)    | 5(1)     | 4(1)     | 11(1)    |
| C13  | 41(1)    | 18(1)    | 15(1)    | 1(1)     | -3(1)    | -2(1)    |
| C23  | 42(1)    | 22(1)    | 17(1)    | 0(1)     | -3(1)    | -3(1)    |
| C33  | 42(1)    | 28(1)    | 23(1)    | 3(1)     | -4(1)    | -10(1)   |
| C43  | 56(2)    | 19(1)    | 28(1)    | 6(1)     | -7(1)    | -8(1)    |
| C53  | 52(1)    | 16(1)    | 25(1)    | 0(1)     | -5(1)    | 2(1)     |
| C63  | 47(1)    | 18(1)    | 20(1)    | -1(1)    | 1(1)     | -1(1)    |
| C73  | 41(1)    | 30(1)    | 26(1)    | 2(1)     | 1(1)     | -2(1)    |

|      |       |       |       |        |        |        |
|------|-------|-------|-------|--------|--------|--------|
| C83  | 44(2) | 47(2) | 43(1) | 6(1)   | -10(1) | -3(1)  |
| C93  | 51(2) | 58(2) | 35(1) | -10(1) | -1(1)  | 7(1)   |
| C103 | 52(2) | 24(1) | 32(1) | 2(1)   | 11(1)  | 6(1)   |
| C113 | 64(2) | 40(1) | 45(1) | -2(1)  | 19(1)  | 15(1)  |
| C123 | 47(2) | 55(2) | 54(2) | -4(1)  | 9(1)   | -10(1) |

---

Table 5. Hydrogen coordinates ( $\times 10^4$ ) and isotropic displacement parameters ( $\text{\AA}^2 \times 10^3$ ) for holmc10.

|      | x    | y    | z    | U(eq) |
|------|------|------|------|-------|
| H11A | 5284 | 4162 | 4497 | 52    |
| H11B | 4527 | 3995 | 3894 | 52    |
| H11C | 5546 | 3804 | 3826 | 52    |
| H51A | 3566 | 2071 | 4681 | 51    |
| H51B | 4389 | 2105 | 4080 | 51    |
| H51C | 3476 | 2396 | 3936 | 51    |
| H61A | 4850 | 3290 | 3285 | 50    |
| H61B | 3797 | 3161 | 3372 | 50    |
| H61C | 4544 | 2757 | 3335 | 50    |
| H32A | 6858 | 4621 | 6380 | 41    |
| H42A | 5719 | 5167 | 6573 | 42    |
| H52A | 4249 | 4992 | 6231 | 39    |
| H72A | 6554 | 3486 | 5575 | 42    |
| H82A | 7154 | 4026 | 4710 | 69    |
| H82B | 7966 | 3741 | 5103 | 69    |
| H82C | 7745 | 4259 | 5383 | 69    |
| H92A | 6896 | 3507 | 6882 | 89    |
| H92B | 7577 | 3934 | 6750 | 89    |
| H92C | 7812 | 3433 | 6399 | 89    |
| H10A | 3494 | 3956 | 5306 | 40    |
| H11D | 3343 | 3772 | 6607 | 63    |
| H11E | 2394 | 3966 | 6290 | 63    |
| H11F | 3036 | 4293 | 6802 | 63    |
| H12A | 3294 | 4720 | 4865 | 65    |
| H12B | 2952 | 4874 | 5702 | 65    |
| H12C | 2364 | 4515 | 5204 | 65    |
| H33A | 2884 | 1548 | 6864 | 37    |
| H43A | 4052 | 1011 | 6778 | 41    |
| H53A | 5353 | 1191 | 6098 | 37    |
| H73A | 2856 | 2673 | 5977 | 39    |

|      |      |      |      |    |
|------|------|------|------|----|
| H83A | 1936 | 2097 | 5421 | 67 |
| H83B | 1342 | 2408 | 5998 | 67 |
| H83C | 1677 | 1902 | 6256 | 67 |
| H93A | 3068 | 2715 | 7308 | 72 |
| H93B | 2412 | 2278 | 7441 | 72 |
| H93C | 2004 | 2758 | 7127 | 72 |
| H10B | 5757 | 2252 | 5081 | 43 |
| H11G | 6720 | 1693 | 4564 | 75 |
| H11H | 5692 | 1518 | 4469 | 75 |
| H11I | 6323 | 1304 | 5132 | 75 |
| H12D | 6408 | 2337 | 6292 | 78 |
| H12E | 7163 | 2144 | 5709 | 78 |
| H12F | 6687 | 1799 | 6309 | 78 |

---

Table 6. Torsion angles [°] for holmc10.

|                   |            |                   |            |
|-------------------|------------|-------------------|------------|
| N21-Fe1-S1-Fe1#1  | 17(18)     | C62#1-K1-S1-K2    | -75(24)    |
| N11-Fe1-S1-Fe1#1  | -164(18)   | C62-K1-S1-K2      | 105(24)    |
| K2-Fe1-S1-Fe1#1   | 0(18)      | C12-K1-S1-K2      | 85(24)     |
| K1-Fe1-S1-Fe1#1   | 180(18)    | C12#1-K1-S1-K2    | -95(24)    |
| N21-Fe1-S1-K1     | -162.81(8) | C42#1-K1-S1-K2    | -113(24)   |
| N11-Fe1-S1-K1     | 16.13(8)   | C42-K1-S1-K2      | 67(24)     |
| K2-Fe1-S1-K1      | 180.0      | C32#1-K1-S1-K2    | -130(24)   |
| N21-Fe1-S1-K2     | 17.19(8)   | C32-K1-S1-K2      | 50(24)     |
| N11-Fe1-S1-K2     | -163.87(8) | C22#1-K1-S1-K2    | -120(24)   |
| K1-Fe1-S1-K2      | 180.0      | C53#1-K2-S1-Fe1#1 | 3.44(6)    |
| C52#1-K1-S1-Fe1#1 | 2.71(6)    | C53-K2-S1-Fe1#1   | -176.56(6) |
| C52-K1-S1-Fe1#1   | -177.29(6) | C63-K2-S1-Fe1#1   | -172.66(5) |
| C62#1-K1-S1-Fe1#1 | 7.66(5)    | C63#1-K2-S1-Fe1#1 | 7.34(5)    |
| C62-K1-S1-Fe1#1   | -172.34(5) | C43#1-K2-S1-Fe1#1 | -30.36(7)  |
| C12-K1-S1-Fe1#1   | 167.77(5)  | C43-K2-S1-Fe1#1   | 149.64(7)  |
| C12#1-K1-S1-Fe1#1 | -12.23(5)  | C13-K2-S1-Fe1#1   | 167.51(4)  |
| C42#1-K1-S1-Fe1#1 | -30.94(8)  | C13#1-K2-S1-Fe1#1 | -12.49(4)  |
| C42-K1-S1-Fe1#1   | 149.06(8)  | C33#1-K2-S1-Fe1#1 | -48.02(5)  |
| C32#1-K1-S1-Fe1#1 | -47.85(6)  | C33-K2-S1-Fe1#1   | 131.99(5)  |
| C32-K1-S1-Fe1#1   | 132.15(6)  | C23#1-K2-S1-Fe1#1 | -37.82(4)  |
| C22#1-K1-S1-Fe1#1 | -37.51(5)  | C53#1-K2-S1-Fe1   | -176.56(6) |
| C52#1-K1-S1-Fe1   | -177.29(6) | C53-K2-S1-Fe1     | 3.44(6)    |
| C52-K1-S1-Fe1     | 2.71(6)    | C63-K2-S1-Fe1     | 7.34(5)    |
| C62#1-K1-S1-Fe1   | -172.34(5) | C63#1-K2-S1-Fe1   | -172.66(5) |
| C62-K1-S1-Fe1     | 7.66(5)    | C43#1-K2-S1-Fe1   | 149.64(7)  |
| C12-K1-S1-Fe1     | -12.23(5)  | C43-K2-S1-Fe1     | -30.36(7)  |
| C12#1-K1-S1-Fe1   | 167.77(5)  | C13-K2-S1-Fe1     | -12.49(4)  |
| C42#1-K1-S1-Fe1   | 149.06(8)  | C13#1-K2-S1-Fe1   | 167.51(4)  |
| C42-K1-S1-Fe1     | -30.94(8)  | C33#1-K2-S1-Fe1   | 131.99(5)  |
| C32#1-K1-S1-Fe1   | 132.15(6)  | C33-K2-S1-Fe1     | -48.01(5)  |
| C32-K1-S1-Fe1     | -47.85(6)  | C23#1-K2-S1-Fe1   | 142.18(4)  |
| C22#1-K1-S1-Fe1   | 142.49(5)  | C53#1-K2-S1-K1    | 86(25)     |
| C52#1-K1-S1-K2    | -80(24)    | C53-K2-S1-K1      | -94(24)    |
| C52-K1-S1-K2      | 100(24)    | C63-K2-S1-K1      | -90(25)    |

|                 |             |                  |             |
|-----------------|-------------|------------------|-------------|
| C63#1-K2-S1-K1  | 90(25)      | C21-C31-C41-N21  | -3.9(4)     |
| C43#1-K2-S1-K1  | 52(25)      | C61-C31-C41-N21  | 174.2(2)    |
| C43-K2-S1-K1    | -128(25)    | C21-C31-C41-C51  | 176.2(2)    |
| C13-K2-S1-K1    | -110(25)    | C61-C31-C41-C51  | -5.7(3)     |
| C13#1-K2-S1-K1  | 70(25)      | C21-N11-C12-C22  | -100.5(2)   |
| C33#1-K2-S1-K1  | 34(25)      | Fe1-N11-C12-C22  | 81.5(2)     |
| C33-K2-S1-K1    | -146(25)    | C21-N11-C12-C62  | 81.4(2)     |
| C23#1-K2-S1-K1  | 44(25)      | Fe1-N11-C12-C62  | -96.59(19)  |
| N21-Fe1-N11-C21 | -3.5(2)     | C21-N11-C12-K1   | 167.45(16)  |
| S1-Fe1-N11-C21  | 177.28(15)  | Fe1-N11-C12-K1   | -10.55(19)  |
| K2-Fe1-N11-C21  | 63.6(4)     | S1-K1-C12-C22    | -102.48(11) |
| K1-Fe1-N11-C21  | -169.7(2)   | C52#1-K1-C12-C22 | 57.07(17)   |
| N21-Fe1-N11-C12 | 174.33(16)  | C52-K1-C12-C22   | 93.68(14)   |
| S1-Fe1-N11-C12  | -4.9(2)     | C62#1-K1-C12-C22 | 6.8(2)      |
| K2-Fe1-N11-C12  | -118.5(2)   | C62-K1-C12-C22   | 125.00(18)  |
| K1-Fe1-N11-C12  | 8.13(15)    | C12#1-K1-C12-C22 | -102.48(11) |
| N11-Fe1-N21-C41 | -1.54(19)   | C42#1-K1-C12-C22 | 96.89(15)   |
| S1-Fe1-N21-C41  | 177.69(14)  | C42-K1-C12-C22   | 61.36(12)   |
| K2-Fe1-N21-C41  | -168.40(19) | C32#1-K1-C12-C22 | 136.22(13)  |
| K1-Fe1-N21-C41  | 66.3(3)     | C32-K1-C12-C22   | 29.34(11)   |
| N11-Fe1-N21-C13 | 174.16(16)  | C22#1-K1-C12-C22 | 179.60(17)  |
| S1-Fe1-N21-C13  | -6.61(19)   | S1-K1-C12-N11    | 16.36(15)   |
| K2-Fe1-N21-C13  | 7.30(14)    | C52#1-K1-C12-N11 | 175.90(14)  |
| K1-Fe1-N21-C13  | -118.02(19) | C52-K1-C12-N11   | -147.5(2)   |
| C12-N11-C21-C31 | -172.4(2)   | C62#1-K1-C12-N11 | 125.60(18)  |
| Fe1-N11-C21-C31 | 5.3(3)      | C62-K1-C12-N11   | -116.2(2)   |
| C12-N11-C21-C11 | 8.4(3)      | C12#1-K1-C12-N11 | 16.36(15)   |
| Fe1-N11-C21-C11 | -173.86(16) | C42#1-K1-C12-N11 | -144.27(15) |
| N11-C21-C31-C41 | -1.5(4)     | C42-K1-C12-N11   | -179.80(19) |
| C11-C21-C31-C41 | 177.6(2)    | C32#1-K1-C12-N11 | -104.94(16) |
| N11-C21-C31-C61 | -179.6(2)   | C32-K1-C12-N11   | 148.18(19)  |
| C11-C21-C31-C61 | -0.4(3)     | C22#1-K1-C12-N11 | -61.6(2)    |
| C13-N21-C41-C31 | -170.6(2)   | S1-K1-C12-C62    | 132.52(13)  |
| Fe1-N21-C41-C31 | 5.0(3)      | C52#1-K1-C12-C62 | -67.93(18)  |
| C13-N21-C41-C51 | 9.3(3)      | C52-K1-C12-C62   | -31.32(13)  |
| Fe1-N21-C41-C51 | -175.10(16) | C62#1-K1-C12-C62 | -118.2(2)   |

|                  |             |                  |             |
|------------------|-------------|------------------|-------------|
| C12#1-K1-C12-C62 | 132.52(13)  | S1-K1-C22-C72    | -41.43(17)  |
| C42#1-K1-C12-C62 | -28.11(17)  | C52#1-K1-C22-C72 | 99.52(18)   |
| C42-K1-C12-C62   | -63.64(14)  | C52-K1-C22-C72   | 177.7(2)    |
| C32#1-K1-C12-C62 | 11.22(17)   | C62#1-K1-C22-C72 | 65.62(19)   |
| C32-K1-C12-C62   | -95.66(15)  | C62-K1-C22-C72   | -148.3(2)   |
| C22#1-K1-C12-C62 | 54.60(19)   | C12-K1-C22-C72   | -117.7(2)   |
| N11-C12-C22-C32  | -176.69(18) | C12#1-K1-C22-C72 | 35.2(2)     |
| C62-C12-C22-C32  | 1.4(3)      | C42#1-K1-C22-C72 | 132.15(17)  |
| K1-C12-C22-C32   | -64.43(18)  | C42-K1-C22-C72   | 145.0(2)    |
| N11-C12-C22-C72  | 5.3(3)      | C32#1-K1-C22-C72 | 160.69(17)  |
| C62-C12-C22-C72  | -176.66(18) | C32-K1-C22-C72   | 116.3(3)    |
| K1-C12-C22-C72   | 117.54(18)  | C22#1-K1-C22-C72 | 139(16)     |
| N11-C12-C22-K1   | -112.26(16) | C12-C22-C32-C42  | -0.9(3)     |
| C62-C12-C22-K1   | 65.80(16)   | C72-C22-C32-C42  | 177.13(19)  |
| S1-K1-C22-C32    | -157.73(15) | K1-C22-C32-C42   | -64.29(19)  |
| C52#1-K1-C22-C32 | -16.78(18)  | C12-C22-C32-K1   | 63.35(17)   |
| C52-K1-C22-C32   | 61.40(15)   | C72-C22-C32-K1   | -118.57(18) |
| C62#1-K1-C22-C32 | -50.67(17)  | S1-K1-C32-C42    | 151.86(13)  |
| C62-K1-C22-C32   | 95.37(16)   | C52#1-K1-C32-C42 | -66.28(15)  |
| C12-K1-C22-C32   | 126.0(2)    | C52-K1-C32-C42   | 30.44(13)   |
| C12#1-K1-C22-C32 | -81.15(19)  | C62#1-K1-C32-C42 | -90.80(15)  |
| C42#1-K1-C22-C32 | 15.85(19)   | C62-K1-C32-C42   | 63.93(15)   |
| C42-K1-C22-C32   | 28.71(14)   | C12-K1-C32-C42   | 97.78(17)   |
| C32#1-K1-C22-C32 | 44.4(3)     | C12#1-K1-C32-C42 | -96.35(17)  |
| C22#1-K1-C22-C32 | 23(16)      | C42#1-K1-C32-C42 | -40.62(19)  |
| S1-K1-C22-C12    | 76.22(11)   | C32#1-K1-C32-C42 | -28.14(13)  |
| C52#1-K1-C22-C12 | -142.83(12) | C22#1-K1-C32-C42 | -52.4(2)    |
| C52-K1-C22-C12   | -64.65(13)  | S1-K1-C32-C22    | 24.45(16)   |
| C62#1-K1-C22-C12 | -176.72(11) | C52#1-K1-C32-C22 | 166.31(15)  |
| C62-K1-C22-C12   | -30.68(11)  | C52-K1-C32-C22   | -96.96(17)  |
| C12#1-K1-C22-C12 | 152.81(18)  | C62#1-K1-C32-C22 | 141.80(14)  |
| C42#1-K1-C22-C12 | -110.20(13) | C62-K1-C32-C22   | -63.47(15)  |
| C42-K1-C22-C12   | -97.34(15)  | C12-K1-C32-C22   | -29.63(13)  |
| C32#1-K1-C22-C12 | -81.66(19)  | C12#1-K1-C32-C22 | 136.24(14)  |
| C32-K1-C22-C12   | -126.0(2)   | C42#1-K1-C32-C22 | -168.02(14) |
| C22#1-K1-C22-C12 | -104(16)    | C42-K1-C32-C22   | -127.4(2)   |

|                  |             |                  |             |
|------------------|-------------|------------------|-------------|
| C32#1-K1-C32-C22 | -155.55(16) | C32-K1-C52-C42   | -30.30(12)  |
| C22#1-K1-C32-C22 | -179.84(7)  | C22#1-K1-C52-C42 | 117.06(14)  |
| C22-C32-C42-C52  | -0.3(3)     | S1-K1-C52-C62    | 10.84(17)   |
| K1-C32-C42-C52   | -65.78(19)  | C52#1-K1-C52-C62 | -169.16(17) |
| C22-C32-C42-K1   | 65.43(19)   | C62#1-K1-C52-C62 | -175.40(7)  |
| S1-K1-C42-C52    | 86.37(14)   | C12-K1-C52-C62   | 31.55(14)   |
| C52#1-K1-C42-C52 | -119.34(13) | C12#1-K1-C52-C62 | -142.80(14) |
| C62#1-K1-C42-C52 | -134.99(13) | C42#1-K1-C52-C62 | -146.27(15) |
| C62-K1-C42-C52   | 29.35(12)   | C42-K1-C52-C62   | 127.4(2)    |
| C12-K1-C42-C52   | 63.14(13)   | C32#1-K1-C52-C62 | -122.92(15) |
| C12#1-K1-C42-C52 | -121.67(13) | C32-K1-C52-C62   | 97.07(16)   |
| C42#1-K1-C42-C52 | -93.63(14)  | C22#1-K1-C52-C62 | -115.57(15) |
| C32#1-K1-C42-C52 | -77.26(14)  | C42-C52-C62-C12  | -0.8(3)     |
| C32-K1-C42-C52   | 124.3(2)    | K1-C52-C62-C12   | -68.63(16)  |
| C22#1-K1-C42-C52 | -84.46(15)  | C42-C52-C62-C102 | 176.52(19)  |
| S1-K1-C42-C32    | -37.96(17)  | K1-C52-C62-C102  | 108.67(17)  |
| C52#1-K1-C42-C32 | 116.33(15)  | C42-C52-C62-K1   | 67.86(19)   |
| C52-K1-C42-C32   | -124.3(2)   | C22-C12-C62-C52  | -0.5(3)     |
| C62#1-K1-C42-C32 | 100.68(15)  | N11-C12-C62-C52  | 177.53(17)  |
| C62-K1-C42-C32   | -94.99(16)  | K1-C12-C62-C52   | 67.68(16)   |
| C12-K1-C42-C32   | -61.19(14)  | C22-C12-C62-C102 | -177.84(18) |
| C12#1-K1-C42-C32 | 114.00(14)  | N11-C12-C62-C102 | 0.2(3)      |
| C42#1-K1-C42-C32 | 142.04(17)  | K1-C12-C62-C102  | -109.61(17) |
| C32#1-K1-C42-C32 | 158.41(10)  | C22-C12-C62-K1   | -68.23(16)  |
| C22#1-K1-C42-C32 | 151.21(13)  | N11-C12-C62-K1   | 109.84(16)  |
| C32-C42-C52-C62  | 1.2(3)      | S1-K1-C62-C52    | -171.34(14) |
| K1-C42-C52-C62   | -66.66(19)  | C52#1-K1-C62-C52 | 13.7(2)     |
| C32-C42-C52-K1   | 67.88(19)   | C62#1-K1-C62-C52 | 8.66(14)    |
| S1-K1-C52-C42    | -116.53(12) | C12-K1-C62-C52   | -122.7(2)   |
| C52#1-K1-C52-C42 | 63.47(12)   | C12#1-K1-C62-C52 | 82.6(2)     |
| C62#1-K1-C52-C42 | 57.23(15)   | C42#1-K1-C62-C52 | 36.99(16)   |
| C62-K1-C52-C42   | -127.4(2)   | C42-K1-C62-C52   | -28.38(14)  |
| C12-K1-C52-C42   | -95.82(15)  | C32#1-K1-C62-C52 | 64.96(16)   |
| C12#1-K1-C52-C42 | 89.83(17)   | C32-K1-C62-C52   | -60.72(14)  |
| C42#1-K1-C52-C42 | 86.36(15)   | C22#1-K1-C62-C52 | 86.67(16)   |
| C32#1-K1-C52-C42 | 109.71(14)  | S1-K1-C62-C12    | -48.60(13)  |

|                   |             |                  |             |
|-------------------|-------------|------------------|-------------|
| C52#1-K1-C62-C12  | 136.39(12)  | C41-N21-C13-K2   | 166.71(15)  |
| C52-K1-C62-C12    | 122.7(2)    | Fe1-N21-C13-K2   | -9.41(18)   |
| C62#1-K1-C62-C12  | 131.40(13)  | S1-K2-C13-C23    | -102.72(11) |
| C12#1-K1-C62-C12  | -154.68(17) | C53#1-K2-C13-C23 | 55.82(16)   |
| C42#1-K1-C62-C12  | 159.73(12)  | C53-K2-C13-C23   | 94.51(13)   |
| C42-K1-C62-C12    | 94.36(16)   | C63-K2-C13-C23   | 125.32(18)  |
| C32#1-K1-C62-C12  | -172.30(12) | C63#1-K2-C13-C23 | 7.1(2)      |
| C32-K1-C62-C12    | 62.02(13)   | C43#1-K2-C13-C23 | 95.40(14)   |
| C22#1-K1-C62-C12  | -150.60(12) | C43-K2-C13-C23   | 61.99(12)   |
| S1-K1-C62-C102    | 70.27(14)   | C13#1-K2-C13-C23 | -102.72(11) |
| C52#1-K1-C62-C102 | -104.74(15) | C33#1-K2-C13-C23 | 134.57(13)  |
| C52-K1-C62-C102   | -118.4(2)   | C33-K2-C13-C23   | 29.71(11)   |
| C62#1-K1-C62-C102 | -109.73(14) | C23#1-K2-C13-C23 | 177.72(17)  |
| C12-K1-C62-C102   | 118.9(2)    | S1-K2-C13-C63    | 131.96(12)  |
| C12#1-K1-C62-C102 | -35.8(2)    | C53#1-K2-C13-C63 | -69.50(17)  |
| C42#1-K1-C62-C102 | -81.40(15)  | C53-K2-C13-C63   | -30.81(12)  |
| C42-K1-C62-C102   | -146.77(17) | C63#1-K2-C13-C63 | -118.2(2)   |
| C32#1-K1-C62-C102 | -53.43(15)  | C43#1-K2-C13-C63 | -29.92(16)  |
| C32-K1-C62-C102   | -179.11(16) | C43-K2-C13-C63   | -63.33(13)  |
| C22#1-K1-C62-C102 | -31.73(17)  | C13#1-K2-C13-C63 | 131.96(12)  |
| C32-C22-C72-C92   | 61.2(3)     | C33#1-K2-C13-C63 | 9.25(17)    |
| C12-C22-C72-C92   | -120.8(3)   | C33-K2-C13-C63   | -95.60(14)  |
| K1-C22-C72-C92    | -30.5(3)    | C23#1-K2-C13-C63 | 52.41(18)   |
| C32-C22-C72-C82   | -63.0(3)    | S1-K2-C13-N21    | 15.76(14)   |
| C12-C22-C72-C82   | 115.0(2)    | C53#1-K2-C13-N21 | 174.30(13)  |
| K1-C22-C72-C82    | -154.70(17) | C53-K2-C13-N21   | -147.01(18) |
| C52-C62-C102-C122 | 40.6(3)     | C63-K2-C13-N21   | -116.2(2)   |
| C12-C62-C102-C122 | -142.2(2)   | C63#1-K2-C13-N21 | 125.60(17)  |
| K1-C62-C102-C122  | 128.14(16)  | C43#1-K2-C13-N21 | -146.12(14) |
| C52-C62-C102-C112 | -83.9(2)    | C43-K2-C13-N21   | -179.53(17) |
| C12-C62-C102-C112 | 93.3(2)     | C13#1-K2-C13-N21 | 15.76(14)   |
| K1-C62-C102-C112  | 3.7(2)      | C33#1-K2-C13-N21 | -106.95(15) |
| C41-N21-C13-C23   | -102.1(2)   | C33-K2-C13-N21   | 148.19(18)  |
| Fe1-N21-C13-C23   | 81.8(2)     | C23#1-K2-C13-N21 | -63.8(2)    |
| C41-N21-C13-C63   | 80.4(3)     | C63-C13-C23-C33  | 2.1(3)      |
| Fe1-N21-C13-C63   | -95.71(19)  | N21-C13-C23-C33  | -175.37(17) |

|                  |             |                  |             |
|------------------|-------------|------------------|-------------|
| K2-C13-C23-C33   | -64.06(17)  | C13#1-K2-C23-C73 | 36.0(2)     |
| C63-C13-C23-C73  | -177.52(18) | C33#1-K2-C23-C73 | 158.69(15)  |
| N21-C13-C23-C73  | 5.0(3)      | C33-K2-C23-C73   | 116.1(2)    |
| K2-C13-C23-C73   | 116.33(18)  | C23#1-K2-C23-C73 | 137.78(15)  |
| C63-C13-C23-K2   | 66.15(17)   | C13-C23-C33-C43  | -1.5(3)     |
| N21-C13-C23-K2   | -111.31(16) | C73-C23-C33-C43  | 178.15(19)  |
| S1-K2-C23-C33    | -158.34(13) | K2-C23-C33-C43   | -64.93(19)  |
| C53#1-K2-C23-C33 | -17.77(16)  | C13-C23-C33-K2   | 63.45(17)   |
| C53-K2-C23-C33   | 61.56(14)   | C73-C23-C33-K2   | -116.92(17) |
| C63-K2-C23-C33   | 95.28(15)   | S1-K2-C33-C43    | 151.02(11)  |
| C63#1-K2-C23-C33 | -51.03(16)  | C53#1-K2-C33-C43 | -67.51(14)  |
| C43#1-K2-C23-C33 | 14.56(17)   | C53-K2-C33-C43   | 30.22(12)   |
| C43-K2-C23-C33   | 28.88(13)   | C63-K2-C33-C43   | 63.79(13)   |
| C13-K2-C23-C33   | 125.52(19)  | C63#1-K2-C33-C43 | -91.34(14)  |
| C13#1-K2-C23-C33 | -80.16(18)  | C43#1-K2-C33-C43 | -41.77(17)  |
| C33#1-K2-C23-C33 | 42.6(2)     | C13-K2-C33-C43   | 97.24(15)   |
| C23#1-K2-C23-C33 | 21.67(13)   | C13#1-K2-C33-C43 | -95.87(15)  |
| S1-K2-C23-C13    | 76.14(11)   | C33#1-K2-C33-C43 | -28.97(11)  |
| C53#1-K2-C23-C13 | -143.29(11) | C23#1-K2-C33-C43 | -52.1(2)    |
| C53-K2-C23-C13   | -63.96(12)  | S1-K2-C33-C23    | 23.92(14)   |
| C63-K2-C23-C13   | -30.24(11)  | C53#1-K2-C33-C23 | 165.38(13)  |
| C63#1-K2-C23-C13 | -176.55(11) | C53-K2-C33-C23   | -96.89(15)  |
| C43#1-K2-C23-C13 | -110.96(12) | C63-K2-C33-C23   | -63.32(13)  |
| C43-K2-C23-C13   | -96.64(14)  | C63#1-K2-C33-C23 | 141.55(13)  |
| C13#1-K2-C23-C13 | 154.32(17)  | C43#1-K2-C33-C23 | -168.88(13) |
| C33#1-K2-C23-C13 | -82.95(17)  | C43-K2-C33-C23   | -127.1(2)   |
| C33-K2-C23-C13   | -125.52(19) | C13-K2-C33-C23   | -29.87(12)  |
| C23#1-K2-C23-C13 | -103.85(11) | C13#1-K2-C33-C23 | 137.02(12)  |
| S1-K2-C23-C73    | -42.23(15)  | C33#1-K2-C33-C23 | -156.08(14) |
| C53#1-K2-C23-C73 | 98.34(16)   | C23#1-K2-C33-C23 | -179.17(6)  |
| C53-K2-C23-C73   | 177.67(18)  | C23-C33-C43-C53  | -0.1(3)     |
| C63-K2-C23-C73   | -148.61(18) | K2-C33-C43-C53   | -66.33(19)  |
| C63#1-K2-C23-C73 | 65.08(17)   | C23-C33-C43-K2   | 66.26(19)   |
| C43#1-K2-C23-C73 | 130.67(15)  | S1-K2-C43-C53    | 85.40(15)   |
| C43-K2-C23-C73   | 144.99(19)  | C53#1-K2-C43-C53 | -120.41(13) |
| C13-K2-C23-C73   | -118.4(2)   | C63-K2-C43-C53   | 29.87(12)   |

|                  |             |                  |             |
|------------------|-------------|------------------|-------------|
| C63#1-K2-C43-C53 | -135.01(13) | C13#1-K2-C53-C63 | -143.74(13) |
| C43#1-K2-C43-C53 | -94.60(15)  | C33#1-K2-C53-C63 | -125.01(14) |
| C13-K2-C43-C53   | 63.21(13)   | C33-K2-C53-C63   | 96.17(15)   |
| C13#1-K2-C43-C53 | -121.06(13) | C23#1-K2-C53-C63 | -117.22(14) |
| C33#1-K2-C43-C53 | -77.74(14)  | C43-C53-C63-C13  | -0.4(3)     |
| C33-K2-C43-C53   | 124.79(19)  | K2-C53-C63-C13   | -67.77(17)  |
| C23#1-K2-C43-C53 | -84.36(14)  | C43-C53-C63-C103 | 177.0(2)    |
| S1-K2-C43-C33    | -39.39(15)  | K2-C53-C63-C103  | 109.62(19)  |
| C53#1-K2-C43-C33 | 114.80(13)  | C43-C53-C63-K2   | 67.38(19)   |
| C53-K2-C43-C33   | -124.79(19) | C23-C13-C63-C53  | -1.2(3)     |
| C63-K2-C43-C33   | -94.92(14)  | N21-C13-C63-C53  | 176.29(18)  |
| C63#1-K2-C43-C33 | 100.20(13)  | K2-C13-C63-C53   | 66.91(18)   |
| C43#1-K2-C43-C33 | 140.61(16)  | C23-C13-C63-C103 | -178.54(19) |
| C13-K2-C43-C33   | -61.58(12)  | N21-C13-C63-C103 | -1.1(3)     |
| C13#1-K2-C43-C33 | 114.15(13)  | K2-C13-C63-C103  | -110.4(2)   |
| C33#1-K2-C43-C33 | 157.47(10)  | C23-C13-C63-K2   | -68.11(17)  |
| C23#1-K2-C43-C33 | 150.85(12)  | N21-C13-C63-K2   | 109.38(16)  |
| C33-C43-C53-C63  | 1.0(3)      | S1-K2-C63-C53    | -173.18(13) |
| K2-C43-C53-C63   | -66.74(19)  | C53#1-K2-C63-C53 | 10.8(2)     |
| C33-C43-C53-K2   | 67.76(19)   | C63#1-K2-C63-C53 | 6.82(13)    |
| S1-K2-C53-C43    | -117.73(12) | C43#1-K2-C63-C53 | 34.26(16)   |
| C53#1-K2-C53-C43 | 62.27(12)   | C43-K2-C63-C53   | -29.05(13)  |
| C63-K2-C53-C43   | -126.3(2)   | C13-K2-C63-C53   | -124.0(2)   |
| C63#1-K2-C53-C43 | 57.34(16)   | C13#1-K2-C63-C53 | 80.1(2)     |
| C43#1-K2-C53-C43 | 85.01(16)   | C33#1-K2-C63-C53 | 62.41(15)   |
| C13-K2-C53-C43   | -95.60(15)  | C33-K2-C63-C53   | -61.63(14)  |
| C13#1-K2-C53-C43 | 89.99(17)   | C23#1-K2-C63-C53 | 84.36(16)   |
| C33#1-K2-C53-C43 | 108.72(14)  | S1-K2-C63-C13    | -49.20(12)  |
| C33-K2-C53-C43   | -30.10(12)  | C53#1-K2-C63-C13 | 134.74(12)  |
| C23#1-K2-C53-C43 | 116.51(14)  | C53-K2-C63-C13   | 124.0(2)    |
| S1-K2-C53-C63    | 8.53(16)    | C63#1-K2-C63-C13 | 130.80(12)  |
| C53#1-K2-C53-C63 | -171.47(16) | C43#1-K2-C63-C13 | 158.24(12)  |
| C63#1-K2-C53-C63 | -176.39(7)  | C43-K2-C63-C13   | 94.93(15)   |
| C43#1-K2-C53-C63 | -148.72(15) | C13#1-K2-C63-C13 | -155.95(17) |
| C43-K2-C53-C63   | 126.3(2)    | C33#1-K2-C63-C13 | -173.61(12) |
| C13-K2-C53-C63   | 30.67(13)   | C33-K2-C63-C13   | 62.35(13)   |

|                   |             |                   |             |
|-------------------|-------------|-------------------|-------------|
| C23#1-K2-C63-C13  | -151.66(12) | C33-C23-C73-C83   | -57.3(3)    |
| S1-K2-C63-C103    | 70.05(14)   | C13-C23-C73-C83   | 122.3(2)    |
| C53#1-K2-C63-C103 | -106.01(15) | K2-C23-C73-C83    | -147.54(15) |
| C53-K2-C63-C103   | -116.8(2)   | C33-C23-C73-C93   | 65.7(3)     |
| C63#1-K2-C63-C103 | -109.95(14) | C13-C23-C73-C93   | -114.7(2)   |
| C43#1-K2-C63-C103 | -82.51(15)  | K2-C23-C73-C93    | -24.5(2)    |
| C43-K2-C63-C103   | -145.82(17) | C53-C63-C103-C123 | -75.7(3)    |
| C13-K2-C63-C103   | 119.3(2)    | C13-C63-C103-C123 | 101.6(2)    |
| C13#1-K2-C63-C103 | -36.7(2)    | K2-C63-C103-C123  | 11.6(2)     |
| C33#1-K2-C63-C103 | -54.36(15)  | C53-C63-C103-C113 | 48.6(3)     |
| C33-K2-C63-C103   | -178.40(16) | C13-C63-C103-C113 | -134.1(2)   |
| C23#1-K2-C63-C103 | -32.41(17)  | K2-C63-C103-C113  | 135.94(18)  |

---

Symmetry transformations used to generate equivalent atoms:

#1 -x+1,y,-z+3/2

REFERENCE NUMBER: holmr37

# CRYSTAL STRUCTURE REPORT

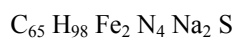

or

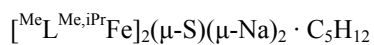

Report prepared for:

M. Rodriguez, Prof. P. Holland

December 15, 2011

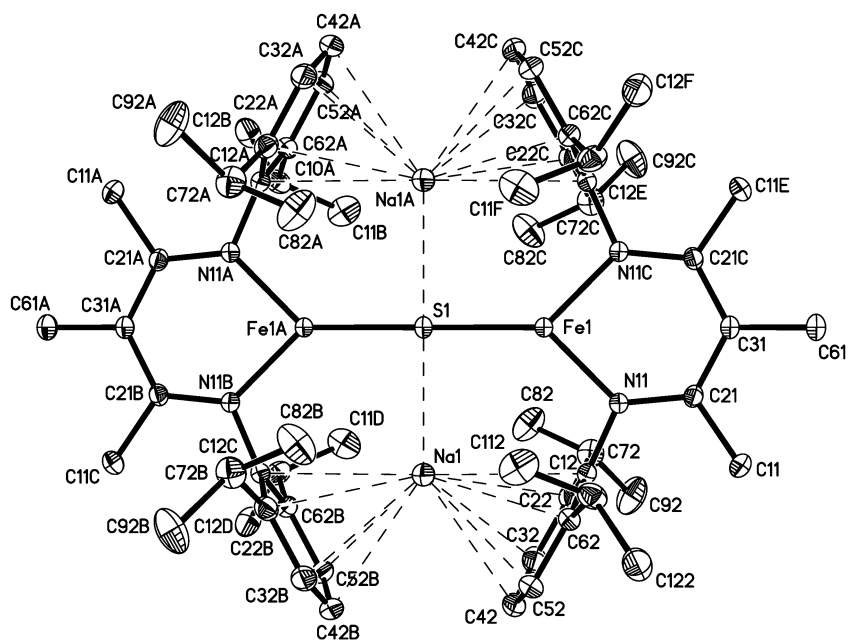

William W. Brennessel

X-ray Crystallographic Facility

Department of Chemistry, University of Rochester

120 Trustee Road

Rochester, NY 14627

### Data collection

A crystal (0.36 x 0.20 x 0.16 mm<sup>3</sup>) was placed onto the tip of a 0.1 mm diameter glass capillary tube or fiber and mounted on a Bruker SMART APEX II CCD Platform diffractometer for a data collection at 100.0(5) K.<sup>1</sup> A preliminary set of cell constants and an orientation matrix were calculated from reflections harvested from three orthogonal wedges of reciprocal space. The full data collection was carried out using MoK $\alpha$  radiation (graphite monochromator) with a frame time of 25 seconds and a detector distance of 4.01 cm. A randomly oriented region of reciprocal space was surveyed: six major sections of frames were collected with 0.50° steps in  $\omega$  at six different  $\phi$  settings and a detector position of -38° in  $2\theta$ . The intensity data were corrected for absorption.<sup>2</sup> Final cell constants were calculated from the xyz centroids of 3993 strong reflections from the actual data collection after integration.<sup>3</sup> See Table 1 for additional crystal and refinement information.

### Structure solution and refinement

The structure was solved using SIR97<sup>4</sup> and refined using SHELXL-97.<sup>5</sup> The space group *I*2/m was determined based on systematic absences and intensity statistics. A direct-methods solution was calculated which provided most non-hydrogen atoms from the E-map. Full-matrix least squares / difference Fourier cycles were performed which located the remaining non-hydrogen atoms. All non-hydrogen atoms were refined with anisotropic displacement parameters. All hydrogen atoms were placed in ideal positions and refined as riding atoms with relative isotropic displacement parameters. The final full matrix least squares refinement converged to  $R1 = 0.0399$  ( $F^2$ ,  $I > 2\sigma(I)$ ) and  $wR2 = 0.1075$  ( $F^2$ , all data).

### Structure description

The structure is the one suggested. The di-iron and co-crystallized pentane solvent molecules both lie in crystallographic 2/m positions; thus one-fourth of each is unique. The pentane molecule is modeled as disordered over the 2/m position (25:25:25:25).

Unless noted otherwise all structural diagrams containing thermal displacement ellipsoids are drawn at the 50 % probability level.

Data collection, structure solution, and structure refinement were conducted at the X-ray Crystallographic Facility, B51 Hutchison Hall, Department of Chemistry, University of Rochester. All publications arising from this report MUST either 1) include William W. Brennessel as a coauthor or 2) acknowledge William W. Brennessel and the X-ray Crystallographic Facility of the Department of Chemistry at the University of Rochester.

- 
- <sup>1</sup> *APEX2*, version 2011.4-1; Bruker AXS: Madison, WI, 2011.
- <sup>2</sup> Sheldrick, G. M. *SADABS*, version 2008/1; University of Göttingen: Göttingen, Germany, 2008.
- <sup>3</sup> *SAINT*, version 7.68A; Bruker AXS: Madison, WI, 2009.
- <sup>4</sup> Altomare, A.; Burla, M. C.; Camalli, M.; Cascarano, G. L.; Giacovazzo, C.; Guagliardi, A.; Moliterni, A. G. G.; Polidori, G.; Spagna, R. *SIR97: A new program for solving and refining crystal structures*; Istituto di Cristallografia, CNR: Bari, Italy, 1999.
- <sup>5</sup> Sheldrick, G. M. *Acta. Cryst.* **2008**, *A64*, 112-122.

Some equations of interest:

$$R_{\text{int}} = \Sigma |F_o^2 - \langle F_o^2 \rangle| / \Sigma |F_o^2|$$

$$R1 = \Sigma ||F_o| - |F_c|| / \Sigma |F_o|$$

$$wR2 = [\Sigma [w(F_o^2 - F_c^2)^2] / \Sigma [w(F_o^2)^2]]^{1/2}$$

where  $w = 1 / [\sigma^2(F_o^2) + (aP)^2 + bP]$  and

$$P = 1/3 \max(0, F_o^2) + 2/3 F_c^2$$

$$\text{GOF} = S = [\Sigma [w(F_o^2 - F_c^2)^2] / (m - n)]^{1/2}$$

where  $m$  = number of reflections and  $n$  = number of parameters

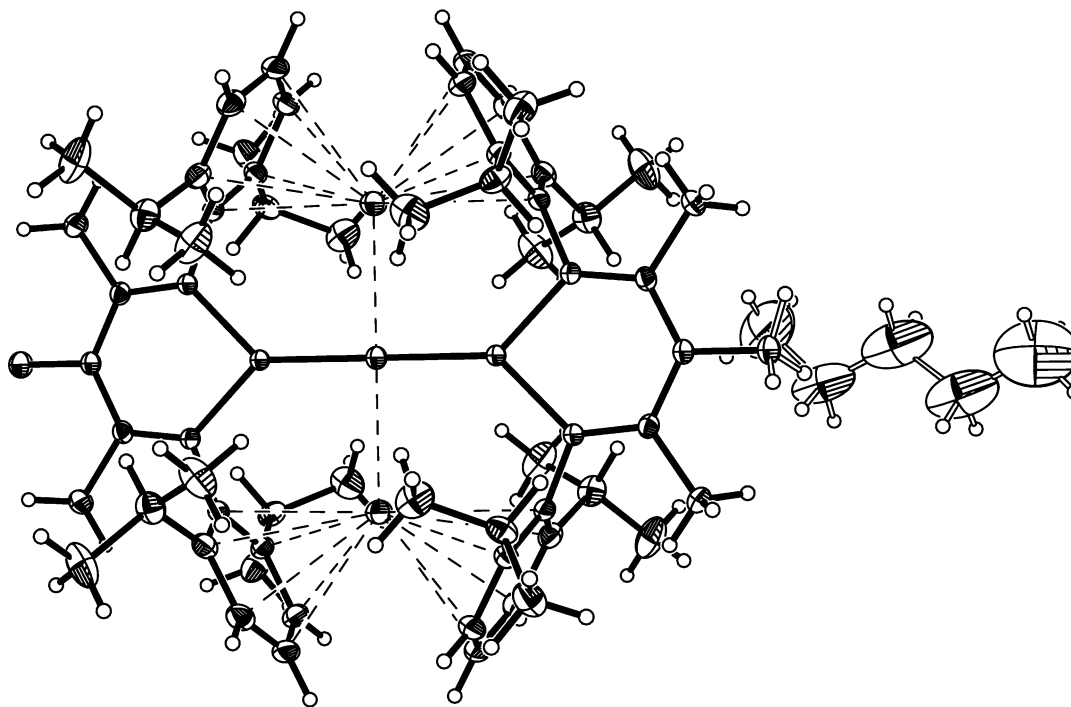

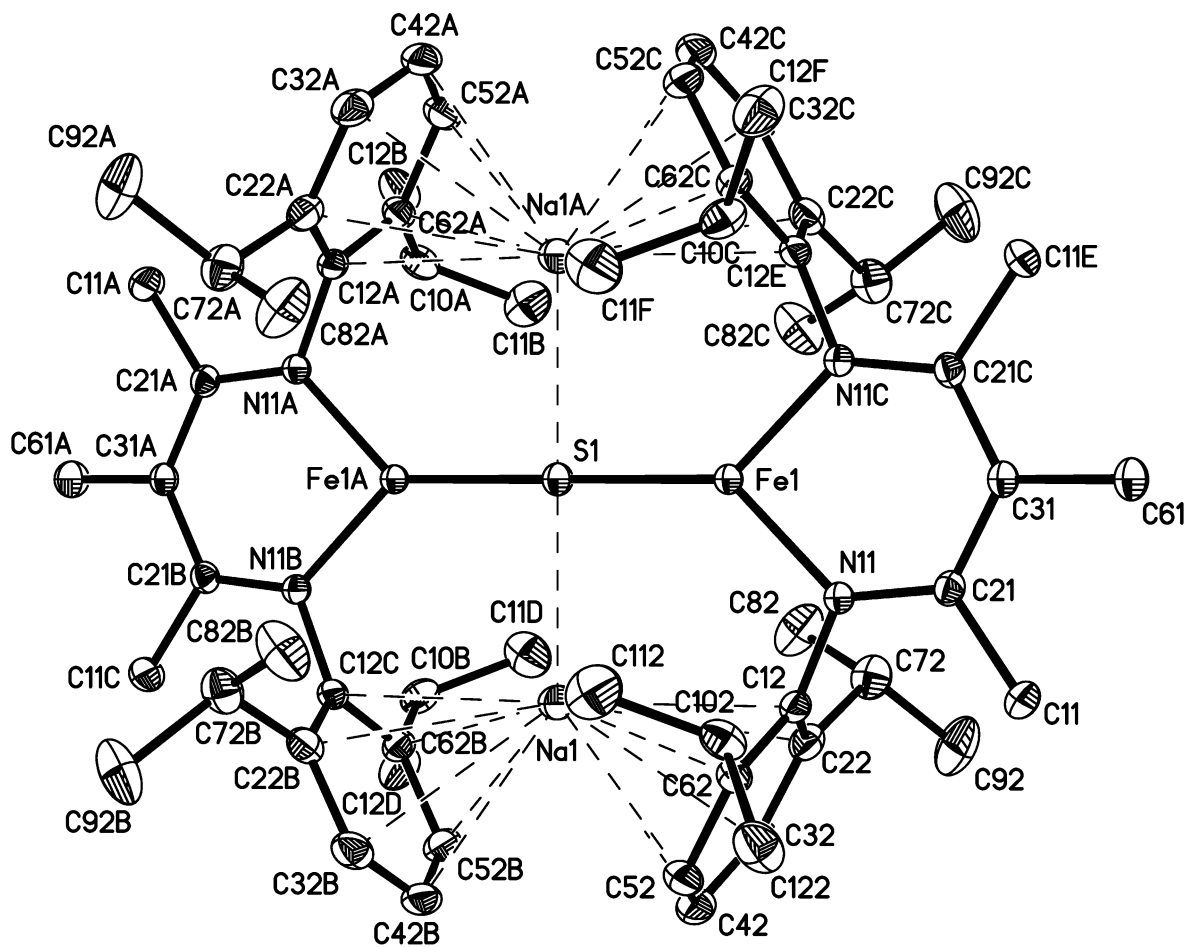

Table 1. Crystal data and structure refinement for holmr37.

|                                                     |                                                              |                           |
|-----------------------------------------------------|--------------------------------------------------------------|---------------------------|
| Identification code                                 | holmr37                                                      |                           |
| Empirical formula                                   | C65 H98 Fe2 N4 Na2 S                                         |                           |
| Formula weight                                      | 1125.21                                                      |                           |
| Temperature                                         | 100.0(5) K                                                   |                           |
| Wavelength                                          | 0.71073 Å                                                    |                           |
| Crystal system                                      | Monoclinic                                                   |                           |
| Space group                                         | <i>I</i> 2/m                                                 |                           |
| Unit cell dimensions                                | $a = 12.007(3)$ Å                                            | $\alpha = 90^\circ$       |
|                                                     | $b = 19.936(3)$ Å                                            | $\beta = 97.963(2)^\circ$ |
|                                                     | $c = 13.4470(17)$ Å                                          | $\gamma = 90^\circ$       |
| Volume                                              | 3187.8(9) Å <sup>3</sup>                                     |                           |
| <i>Z</i>                                            | 2                                                            |                           |
| Density (calculated)                                | 1.172 Mg/m <sup>3</sup>                                      |                           |
| Absorption coefficient                              | 0.542 mm <sup>-1</sup>                                       |                           |
| <i>F</i> (000)                                      | 1212                                                         |                           |
| Crystal color, morphology                           | green-black, block                                           |                           |
| Crystal size                                        | 0.36 x 0.20 x 0.16 mm <sup>3</sup>                           |                           |
| Theta range for data collection                     | 1.84 to 37.78°                                               |                           |
| Index ranges                                        | $-20 \leq h \leq 20, -34 \leq k \leq 34, -23 \leq l \leq 23$ |                           |
| Reflections collected                               | 58864                                                        |                           |
| Independent reflections                             | 8744 [ <i>R</i> (int) = 0.0570]                              |                           |
| Observed reflections                                | 6726                                                         |                           |
| Completeness to theta = 37.78°                      | 99.9%                                                        |                           |
| Absorption correction                               | Multi-scan                                                   |                           |
| Max. and min. transmission                          | 0.9184 and 0.8289                                            |                           |
| Refinement method                                   | Full-matrix least-squares on <i>F</i> <sup>2</sup>           |                           |
| Data / restraints / parameters                      | 8744 / 8 / 210                                               |                           |
| Goodness-of-fit on <i>F</i> <sup>2</sup>            | 1.071                                                        |                           |
| Final <i>R</i> indices [ <i>I</i> > 2σ( <i>I</i> )] | <i>R</i> 1 = 0.0399, <i>wR</i> 2 = 0.0978                    |                           |
| <i>R</i> indices (all data)                         | <i>R</i> 1 = 0.0586, <i>wR</i> 2 = 0.1075                    |                           |
| Largest diff. peak and hole                         | 0.739 and -0.304 e.Å <sup>-3</sup>                           |                           |

Table 2. Atomic coordinates ( $\times 10^4$ ) and equivalent isotropic displacement parameters ( $\text{\AA}^2 \times 10^3$ ) for holmr37.  $U_{\text{eq}}$  is defined as one third of the trace of the orthogonalized  $U_{ij}$  tensor.

|      | x        | y        | z        | $U_{\text{eq}}$ |
|------|----------|----------|----------|-----------------|
| Fe1  | 9416(1)  | 0        | 1477(1)  | 14(1)           |
| S1   | 10000    | 0        | 0        | 20(1)           |
| Na1  | 10000    | 1354(1)  | 0        | 25(1)           |
| N11  | 9042(1)  | 693(1)   | 2387(1)  | 15(1)           |
| C11  | 8490(1)  | 1257(1)  | 3872(1)  | 25(1)           |
| C21  | 8734(1)  | 627(1)   | 3311(1)  | 16(1)           |
| C31  | 8622(1)  | 0        | 3771(1)  | 16(1)           |
| C61  | 8382(1)  | 0        | 4854(1)  | 24(1)           |
| C12  | 9102(1)  | 1341(1)  | 1962(1)  | 16(1)           |
| C22  | 8159(1)  | 1605(1)  | 1341(1)  | 21(1)           |
| C32  | 8272(1)  | 2217(1)  | 857(1)   | 26(1)           |
| C42  | 9275(1)  | 2570(1)  | 990(1)   | 27(1)           |
| C52  | 10192(1) | 2315(1)  | 1622(1)  | 24(1)           |
| C62  | 10122(1) | 1705(1)  | 2122(1)  | 19(1)           |
| C72  | 7042(1)  | 1241(1)  | 1205(1)  | 26(1)           |
| C82  | 6752(1)  | 974(1)   | 133(1)   | 39(1)           |
| C92  | 6094(1)  | 1693(1)  | 1473(1)  | 42(1)           |
| C102 | 11120(1) | 1437(1)  | 2826(1)  | 23(1)           |
| C112 | 12030(1) | 1167(1)  | 2241(1)  | 36(1)           |
| C122 | 11607(1) | 1964(1)  | 3590(1)  | 31(1)           |
| C14  | 5266(12) | -195(11) | 2832(12) | 126(9)          |
| C24  | 5259(8)  | 302(6)   | 3677(12) | 81(6)           |
| C34  | 5005(9)  | -36(9)   | 4640(10) | 107(4)          |
| C44  | 4950(9)  | 415(6)   | 5543(10) | 107(4)          |
| C54  | 4806(14) | 70(20)   | 6523(19) | 143(10)         |

Table 3. Bond lengths [Å] and angles [°] for holmr37.

|               |            |               |            |
|---------------|------------|---------------|------------|
| Fe(1)-N(11)#1 | 1.9387(7)  | C(22)-C(72)   | 1.5143(15) |
| Fe(1)-N(11)   | 1.9388(7)  | C(32)-C(42)   | 1.3839(17) |
| Fe(1)-S(1)    | 2.1957(3)  | C(32)-H(32A)  | 0.9500     |
| Fe(1)-Na(1)#2 | 3.4796(6)  | C(42)-C(52)   | 1.3903(16) |
| Fe(1)-Na(1)   | 3.4796(6)  | C(42)-H(42A)  | 0.9500     |
| S(1)-Fe(1)#2  | 2.1957(3)  | C(52)-C(62)   | 1.3984(13) |
| S(1)-Na(1)#2  | 2.6994(7)  | C(52)-H(52A)  | 0.9500     |
| S(1)-Na(1)    | 2.6994(7)  | C(62)-C(102)  | 1.5163(14) |
| Na(1)-C(52)#3 | 2.8884(11) | C(72)-C(82)   | 1.5318(16) |
| Na(1)-C(52)   | 2.8884(11) | C(72)-C(92)   | 1.5333(16) |
| Na(1)-C(62)#3 | 2.9218(10) | C(72)-H(72A)  | 1.0000     |
| Na(1)-C(62)   | 2.9218(10) | C(82)-H(82A)  | 0.9800     |
| Na(1)-C(42)   | 2.9537(12) | C(82)-H(82B)  | 0.9800     |
| Na(1)-C(42)#3 | 2.9537(12) | C(82)-H(82C)  | 0.9800     |
| Na(1)-C(12)   | 2.9845(9)  | C(92)-H(92A)  | 0.9800     |
| Na(1)-C(12)#3 | 2.9845(9)  | C(92)-H(92B)  | 0.9800     |
| Na(1)-C(32)   | 3.0421(11) | C(92)-H(92C)  | 0.9800     |
| Na(1)-C(32)#3 | 3.0422(11) | C(102)-C(122) | 1.5280(15) |
| Na(1)-C(22)#3 | 3.0804(10) | C(102)-C(112) | 1.5297(17) |
| N(11)-C(21)   | 1.3517(11) | C(102)-H(10A) | 1.0000     |
| N(11)-C(12)   | 1.4193(11) | C(112)-H(11D) | 0.9800     |
| C(11)-C(21)   | 1.5150(13) | C(112)-H(11E) | 0.9800     |
| C(11)-H(11A)  | 0.9800     | C(112)-H(11F) | 0.9800     |
| C(11)-H(11B)  | 0.9800     | C(122)-H(12A) | 0.9800     |
| C(11)-H(11C)  | 0.9800     | C(122)-H(12B) | 0.9800     |
| C(21)-C(31)   | 1.4087(10) | C(122)-H(12C) | 0.9800     |
| C(31)-C(21)#1 | 1.4088(10) | C(14)-C(24)   | 1.509(8)   |
| C(31)-C(61)   | 1.5229(18) | C(14)-H(14A)  | 0.9800     |
| C(61)-H(61A)  | 0.9800     | C(14)-H(14B)  | 0.9800     |
| C(61)-H(61B)  | 0.9800     | C(14)-H(14C)  | 0.9800     |
| C(61)-H(61C)  | 0.9800     | C(24)-C(34)   | 1.528(9)   |
| C(12)-C(22)   | 1.4122(13) | C(24)-H(24A)  | 0.9900     |
| C(12)-C(62)   | 1.4134(13) | C(24)-H(24B)  | 0.9900     |
| C(22)-C(32)   | 1.3978(14) | C(34)-C(44)   | 1.519(8)   |

|                       |             |                       |           |
|-----------------------|-------------|-----------------------|-----------|
| C(34)-H(34A)          | 0.9900      | C(52)-Na(1)-C(42)     | 27.51(3)  |
| C(34)-H(34B)          | 0.9900      | C(62)#3-Na(1)-C(42)   | 105.41(3) |
| C(44)-C(54)           | 1.517(7)    | C(62)-Na(1)-C(42)     | 48.83(3)  |
| C(44)-H(44A)          | 0.9900      | S(1)-Na(1)-C(42)#3    | 145.14(2) |
| C(44)-H(44B)          | 0.9900      | C(52)#3-Na(1)-C(42)#3 | 27.51(3)  |
| C(54)-H(54A)          | 0.9800      | C(52)-Na(1)-C(42)#3   | 78.37(3)  |
| C(54)-H(54B)          | 0.9800      | C(62)#3-Na(1)-C(42)#3 | 48.83(3)  |
| C(54)-H(54C)          | 0.9800      | C(62)-Na(1)-C(42)#3   | 105.41(3) |
| N(11)#1-Fe(1)-N(11)   | 90.88(4)    | C(42)-Na(1)-C(42)#3   | 69.73(4)  |
| N(11)#1-Fe(1)-S(1)    | 134.56(2)   | S(1)-Na(1)-C(12)      | 89.51(2)  |
| N(11)-Fe(1)-S(1)      | 134.56(2)   | C(52)#3-Na(1)-C(12)   | 132.25(3) |
| N(11)#1-Fe(1)-Na(1)#2 | 83.69(2)    | C(52)-Na(1)-C(12)     | 48.62(3)  |
| N(11)-Fe(1)-Na(1)#2   | 174.54(2)   | C(62)#3-Na(1)-C(12)   | 152.84(3) |
| S(1)-Fe(1)-Na(1)#2    | 50.875(8)   | C(62)-Na(1)-C(12)     | 27.67(3)  |
| N(11)#1-Fe(1)-Na(1)   | 174.54(2)   | C(42)-Na(1)-C(12)     | 56.20(3)  |
| N(11)-Fe(1)-Na(1)     | 83.68(2)    | C(42)#3-Na(1)-C(12)   | 124.77(3) |
| S(1)-Fe(1)-Na(1)      | 50.876(8)   | S(1)-Na(1)-C(12)#3    | 89.51(2)  |
| Na(1)#2-Fe(1)-Na(1)   | 101.751(16) | C(52)#3-Na(1)-C(12)#3 | 48.62(3)  |
| Fe(1)#2-S(1)-Fe(1)    | 180.0       | C(52)-Na(1)-C(12)#3   | 132.25(3) |
| Fe(1)#2-S(1)-Na(1)#2  | 90.0        | C(62)#3-Na(1)-C(12)#3 | 27.67(3)  |
| Fe(1)-S(1)-Na(1)#2    | 90.0        | C(62)-Na(1)-C(12)#3   | 152.84(3) |
| Fe(1)#2-S(1)-Na(1)    | 90.0        | C(42)-Na(1)-C(12)#3   | 124.77(3) |
| Fe(1)-S(1)-Na(1)      | 90.0        | C(42)#3-Na(1)-C(12)#3 | 56.20(3)  |
| Na(1)#2-S(1)-Na(1)    | 180.0       | C(12)-Na(1)-C(12)#3   | 179.02(4) |
| S(1)-Na(1)-C(52)#3    | 131.56(2)   | S(1)-Na(1)-C(32)      | 124.45(2) |
| S(1)-Na(1)-C(52)      | 131.55(2)   | C(52)#3-Na(1)-C(32)   | 85.62(3)  |
| C(52)#3-Na(1)-C(52)   | 96.89(4)    | C(52)-Na(1)-C(32)     | 47.62(3)  |
| S(1)-Na(1)-C(62)#3    | 103.84(2)   | C(62)#3-Na(1)-C(32)   | 106.85(3) |
| C(52)#3-Na(1)-C(62)#3 | 27.85(3)    | C(62)-Na(1)-C(32)     | 55.91(3)  |
| C(52)-Na(1)-C(62)#3   | 124.53(3)   | C(42)-Na(1)-C(32)     | 26.64(3)  |
| S(1)-Na(1)-C(62)      | 103.84(2)   | C(42)#3-Na(1)-C(32)   | 88.03(4)  |
| C(52)#3-Na(1)-C(62)   | 124.53(3)   | C(12)-Na(1)-C(32)     | 47.27(3)  |
| C(52)-Na(1)-C(62)     | 27.85(3)    | C(12)#3-Na(1)-C(32)   | 133.49(3) |
| C(62)#3-Na(1)-C(62)   | 152.32(4)   | S(1)-Na(1)-C(32)#3    | 124.45(2) |
| S(1)-Na(1)-C(42)      | 145.14(2)   | C(52)#3-Na(1)-C(32)#3 | 47.62(3)  |
| C(52)#3-Na(1)-C(42)   | 78.37(3)    | C(52)-Na(1)-C(32)#3   | 85.62(3)  |

|                       |            |                    |            |
|-----------------------|------------|--------------------|------------|
| C(62)#3-Na(1)-C(32)#3 | 55.91(3)   | C(22)-C(12)-C(62)  | 120.40(8)  |
| C(62)-Na(1)-C(32)#3   | 106.85(3)  | C(22)-C(12)-N(11)  | 119.76(8)  |
| C(42)-Na(1)-C(32)#3   | 88.03(4)   | C(62)-C(12)-N(11)  | 119.78(8)  |
| C(42)#3-Na(1)-C(32)#3 | 26.64(3)   | C(22)-C(12)-Na(1)  | 80.36(5)   |
| C(12)-Na(1)-C(32)#3   | 133.49(3)  | C(62)-C(12)-Na(1)  | 73.70(5)   |
| C(12)#3-Na(1)-C(32)#3 | 47.27(3)   | N(11)-C(12)-Na(1)  | 114.11(5)  |
| C(32)-Na(1)-C(32)#3   | 111.10(5)  | C(32)-C(22)-C(12)  | 118.62(9)  |
| S(1)-Na(1)-C(22)#3    | 99.36(2)   | C(32)-C(22)-C(72)  | 120.27(9)  |
| C(52)#3-Na(1)-C(22)#3 | 55.85(3)   | C(12)-C(22)-C(72)  | 121.11(9)  |
| C(52)-Na(1)-C(22)#3   | 110.21(3)  | C(32)-C(22)-Na(1)  | 75.28(6)   |
| C(62)#3-Na(1)-C(22)#3 | 48.13(3)   | C(12)-C(22)-Na(1)  | 72.77(5)   |
| C(62)-Na(1)-C(22)#3   | 126.13(3)  | C(72)-C(22)-Na(1)  | 123.16(6)  |
| C(42)-Na(1)-C(22)#3   | 114.23(3)  | C(42)-C(32)-C(22)  | 121.44(9)  |
| C(42)#3-Na(1)-C(22)#3 | 47.36(3)   | C(42)-C(32)-Na(1)  | 73.12(6)   |
| C(12)-Na(1)-C(22)#3   | 153.48(3)  | C(22)-C(32)-Na(1)  | 78.34(6)   |
| C(12)#3-Na(1)-C(22)#3 | 26.87(2)   | C(42)-C(32)-H(32A) | 119.3      |
| C(32)-Na(1)-C(22)#3   | 135.38(4)  | C(22)-C(32)-H(32A) | 119.3      |
| C(32)#3-Na(1)-C(22)#3 | 26.38(3)   | Na(1)-C(32)-H(32A) | 120.2      |
| C(21)-N(11)-C(12)     | 119.68(7)  | C(32)-C(42)-C(52)  | 119.63(9)  |
| C(21)-N(11)-Fe(1)     | 128.87(6)  | C(32)-C(42)-Na(1)  | 80.25(6)   |
| C(12)-N(11)-Fe(1)     | 111.44(5)  | C(52)-C(42)-Na(1)  | 73.63(6)   |
| C(21)-C(11)-H(11A)    | 109.5      | C(32)-C(42)-H(42A) | 120.2      |
| C(21)-C(11)-H(11B)    | 109.5      | C(52)-C(42)-H(42A) | 120.2      |
| H(11A)-C(11)-H(11B)   | 109.5      | Na(1)-C(42)-H(42A) | 116.7      |
| C(21)-C(11)-H(11C)    | 109.5      | C(42)-C(52)-C(62)  | 121.13(10) |
| H(11A)-C(11)-H(11C)   | 109.5      | C(42)-C(52)-Na(1)  | 78.86(6)   |
| H(11B)-C(11)-H(11C)   | 109.5      | C(62)-C(52)-Na(1)  | 77.41(6)   |
| N(11)-C(21)-C(31)     | 123.06(8)  | C(42)-C(52)-H(52A) | 119.4      |
| N(11)-C(21)-C(11)     | 118.23(8)  | C(62)-C(52)-H(52A) | 119.4      |
| C(31)-C(21)-C(11)     | 118.71(8)  | Na(1)-C(52)-H(52A) | 114.7      |
| C(21)-C(31)-C(21)#1   | 124.94(11) | C(52)-C(62)-C(12)  | 118.72(9)  |
| C(21)-C(31)-C(61)     | 117.53(5)  | C(52)-C(62)-C(102) | 120.76(9)  |
| C(21)#1-C(31)-C(61)   | 117.53(5)  | C(12)-C(62)-C(102) | 120.52(8)  |
| C(31)-C(61)-H(61A)    | 109.5      | C(52)-C(62)-Na(1)  | 74.75(6)   |
| C(31)-C(61)-H(61B)    | 109.5      | C(12)-C(62)-Na(1)  | 78.63(5)   |
| C(31)-C(61)-H(61C)    | 109.5      | C(102)-C(62)-Na(1) | 116.98(6)  |

|                      |            |                      |           |
|----------------------|------------|----------------------|-----------|
| C(22)-C(72)-C(82)    | 111.24(9)  | C(102)-C(112)-H(11F) | 109.5     |
| C(22)-C(72)-C(92)    | 111.33(10) | H(11D)-C(112)-H(11F) | 109.5     |
| C(82)-C(72)-C(92)    | 110.24(9)  | H(11E)-C(112)-H(11F) | 109.5     |
| C(22)-C(72)-H(72A)   | 108.0      | C(102)-C(122)-H(12A) | 109.5     |
| C(82)-C(72)-H(72A)   | 108.0      | C(102)-C(122)-H(12B) | 109.5     |
| C(92)-C(72)-H(72A)   | 108.0      | H(12A)-C(122)-H(12B) | 109.5     |
| C(72)-C(82)-H(82A)   | 109.5      | C(102)-C(122)-H(12C) | 109.5     |
| C(72)-C(82)-H(82B)   | 109.5      | H(12A)-C(122)-H(12C) | 109.5     |
| H(82A)-C(82)-H(82B)  | 109.5      | H(12B)-C(122)-H(12C) | 109.5     |
| C(72)-C(82)-H(82C)   | 109.5      | C(14)-C(24)-C(34)    | 111.8(10) |
| H(82A)-C(82)-H(82C)  | 109.5      | C(14)-C(24)-H(24A)   | 109.3     |
| H(82B)-C(82)-H(82C)  | 109.5      | C(34)-C(24)-H(24A)   | 109.3     |
| C(72)-C(92)-H(92A)   | 109.5      | C(14)-C(24)-H(24B)   | 109.3     |
| C(72)-C(92)-H(92B)   | 109.5      | C(34)-C(24)-H(24B)   | 109.3     |
| H(92A)-C(92)-H(92B)  | 109.5      | H(24A)-C(24)-H(24B)  | 107.9     |
| C(72)-C(92)-H(92C)   | 109.5      | C(44)-C(34)-C(24)    | 116.9(13) |
| H(92A)-C(92)-H(92C)  | 109.5      | C(44)-C(34)-H(34A)   | 108.1     |
| H(92B)-C(92)-H(92C)  | 109.5      | C(24)-C(34)-H(34A)   | 108.1     |
| C(62)-C(102)-C(122)  | 111.94(9)  | C(44)-C(34)-H(34B)   | 108.1     |
| C(62)-C(102)-C(112)  | 111.20(9)  | C(24)-C(34)-H(34B)   | 108.1     |
| C(122)-C(102)-C(112) | 110.73(9)  | H(34A)-C(34)-H(34B)  | 107.3     |
| C(62)-C(102)-H(10A)  | 107.6      | C(54)-C(44)-C(34)    | 116.8(18) |
| C(122)-C(102)-H(10A) | 107.6      | C(54)-C(44)-H(44A)   | 108.1     |
| C(112)-C(102)-H(10A) | 107.6      | C(34)-C(44)-H(44A)   | 108.1     |
| C(102)-C(112)-H(11D) | 109.5      | C(54)-C(44)-H(44B)   | 108.1     |
| C(102)-C(112)-H(11E) | 109.5      | C(34)-C(44)-H(44B)   | 108.1     |
| H(11D)-C(112)-H(11E) | 109.5      | H(44A)-C(44)-H(44B)  | 107.3     |

---

Symmetry transformations used to generate equivalent atoms:

#1 x,-y,z    #2 -x+2,-y,-z    #3 -x+2,y,-z

Table 4. Anisotropic displacement parameters ( $\text{\AA}^2 \times 10^3$ ) for holmr37. The anisotropic displacement factor exponent takes the form:  $-2\pi^2 [h^2 a^{*2} U_{11} + \dots + 2 h k a^* b^* U_{12}]$

|      | $U_{11}$ | $U_{22}$ | $U_{33}$ | $U_{23}$ | $U_{13}$ | $U_{12}$ |
|------|----------|----------|----------|----------|----------|----------|
| Fe1  | 17(1)    | 13(1)    | 12(1)    | 0        | 5(1)     | 0        |
| S1   | 30(1)    | 16(1)    | 15(1)    | 0        | 10(1)    | 0        |
| Na1  | 39(1)    | 18(1)    | 20(1)    | 0        | 10(1)    | 0        |
| N11  | 18(1)    | 14(1)    | 13(1)    | 0(1)     | 4(1)     | 0(1)     |
| C11  | 37(1)    | 19(1)    | 21(1)    | -4(1)    | 13(1)    | 0(1)     |
| C21  | 17(1)    | 17(1)    | 14(1)    | -2(1)    | 4(1)     | 0(1)     |
| C31  | 18(1)    | 17(1)    | 13(1)    | 0        | 4(1)     | 0        |
| C61  | 35(1)    | 24(1)    | 16(1)    | 0        | 10(1)    | 0        |
| C12  | 21(1)    | 14(1)    | 14(1)    | 0(1)     | 5(1)     | 1(1)     |
| C22  | 24(1)    | 20(1)    | 18(1)    | 0(1)     | 4(1)     | 6(1)     |
| C32  | 36(1)    | 23(1)    | 20(1)    | 5(1)     | 6(1)     | 11(1)    |
| C42  | 45(1)    | 17(1)    | 23(1)    | 5(1)     | 13(1)    | 6(1)     |
| C52  | 35(1)    | 17(1)    | 23(1)    | 2(1)     | 10(1)    | -4(1)    |
| C62  | 24(1)    | 16(1)    | 17(1)    | 0(1)     | 5(1)     | -2(1)    |
| C72  | 20(1)    | 31(1)    | 27(1)    | 1(1)     | 1(1)     | 6(1)     |
| C82  | 28(1)    | 47(1)    | 41(1)    | -17(1)   | 1(1)     | 5(1)     |
| C92  | 26(1)    | 59(1)    | 42(1)    | -15(1)   | 7(1)     | 8(1)     |
| C102 | 23(1)    | 22(1)    | 24(1)    | 2(1)     | 0(1)     | -6(1)    |
| C112 | 24(1)    | 38(1)    | 44(1)    | -8(1)    | 0(1)     | 1(1)     |
| C122 | 35(1)    | 34(1)    | 22(1)    | -2(1)    | 2(1)     | -14(1)   |
| C14  | 84(8)    | 112(16)  | 197(18)  | -65(15)  | 73(11)   | -46(9)   |
| C24  | 22(4)    | 52(6)    | 164(17)  | -32(8)   | 1(6)     | 0(4)     |
| C34  | 34(2)    | 74(5)    | 213(12)  | -46(8)   | 13(6)    | -15(5)   |
| C44  | 34(2)    | 74(5)    | 213(12)  | -46(8)   | 13(6)    | -15(5)   |
| C54  | 82(12)   | 140(30)  | 190(20)  | 20(40)   | -40(16)  | 40(20)   |

Table 5. Hydrogen coordinates ( $\times 10^4$ ) and isotropic displacement parameters ( $\text{\AA}^2 \times 10^3$ ) for holmr37.

|      | x     | y    | z    | U(eq) |
|------|-------|------|------|-------|
| H11A | 8492  | 1645 | 3425 | 37    |
| H11B | 9070  | 1316 | 4454 | 37    |
| H11C | 7752  | 1217 | 4099 | 37    |
| H61A | 8390  | -462 | 5104 | 36    |
| H61B | 7642  | 200  | 4885 | 36    |
| H61C | 8960  | 262  | 5270 | 36    |
| H32A | 7647  | 2395 | 427  | 31    |
| H42A | 9336  | 2983 | 651  | 33    |
| H52A | 10877 | 2560 | 1716 | 29    |
| H72A | 7108  | 849  | 1673 | 31    |
| H82A | 7362  | 685  | -29  | 59    |
| H82B | 6655  | 1351 | -339 | 59    |
| H82C | 6053  | 715  | 79   | 59    |
| H92A | 6310  | 1884 | 2144 | 63    |
| H92B | 5405  | 1428 | 1465 | 63    |
| H92C | 5961  | 2057 | 980  | 63    |
| H10A | 10847 | 1054 | 3207 | 28    |
| H11D | 11711 | 813  | 1782 | 53    |
| H11E | 12651 | 984  | 2711 | 53    |
| H11F | 12309 | 1532 | 1854 | 53    |
| H12A | 11016 | 2123 | 3967 | 46    |
| H12B | 11899 | 2342 | 3239 | 46    |
| H12C | 12218 | 1764 | 4055 | 46    |
| H14A | 5923  | -489 | 2974 | 189   |
| H14B | 5300  | 47   | 2202 | 189   |
| H14C | 4578  | -466 | 2770 | 189   |
| H24A | 4686  | 651  | 3474 | 97    |
| H24B | 6002  | 525  | 3807 | 97    |
| H34A | 4276  | -272 | 4488 | 129   |
| H34B | 5588  | -381 | 4832 | 129   |

|      |      |      |      |     |
|------|------|------|------|-----|
| H44A | 5648 | 684  | 5653 | 129 |
| H44B | 4316 | 731  | 5374 | 129 |
| H54A | 4070 | -149 | 6457 | 215 |
| H54B | 4856 | 405  | 7062 | 215 |
| H54C | 5400 | -265 | 6683 | 215 |

---

Table 6. Torsion angles [°] for holmr37.

|                    |              |                    |             |
|--------------------|--------------|--------------------|-------------|
| N11#1-Fe1-S1-Fe1#2 | -29(16)      | Fe1#2-S1-Na1-C32   | 143.45(2)   |
| N11-Fe1-S1-Fe1#2   | 153(16)      | Fe1-S1-Na1-C32     | -36.55(2)   |
| Na1#2-Fe1-S1-Fe1#2 | -28(16)      | Na1#2-S1-Na1-C32   | -152.94(2)  |
| Na1-Fe1-S1-Fe1#2   | 152(16)      | Fe1#2-S1-Na1-C32#3 | -36.55(2)   |
| N11#1-Fe1-S1-Na1#2 | -0.65(3)     | Fe1-S1-Na1-C32#3   | 143.45(2)   |
| N11-Fe1-S1-Na1#2   | -179.35(3)   | Na1#2-S1-Na1-C32#3 | 27.06(2)    |
| Na1-Fe1-S1-Na1#2   | 180.0        | Fe1#2-S1-Na1-C22#3 | -27.633(18) |
| N11#1-Fe1-S1-Na1   | 179.35(3)    | Fe1-S1-Na1-C22#3   | 152.366(18) |
| N11-Fe1-S1-Na1     | 0.65(3)      | Na1#2-S1-Na1-C22#3 | 35.976(19)  |
| Na1#2-Fe1-S1-Na1   | 180.0        | N11#1-Fe1-N11-C21  | 4.15(9)     |
| Fe1#2-S1-Na1-C52#3 | 24.48(3)     | S1-Fe1-N11-C21     | -176.77(6)  |
| Fe1-S1-Na1-C52#3   | -155.52(3)   | Na1#2-Fe1-N11-C21  | 8.5(3)      |
| Na1#2-S1-Na1-C52#3 | 88.09(3)     | Na1-Fe1-N11-C21    | -176.27(8)  |
| Fe1#2-S1-Na1-C52   | -155.52(3)   | N11#1-Fe1-N11-C12  | -174.68(4)  |
| Fe1-S1-Na1-C52     | 24.48(3)     | S1-Fe1-N11-C12     | 4.40(8)     |
| Na1#2-S1-Na1-C52   | -91.91(3)    | Na1#2-Fe1-N11-C12  | -170.3(2)   |
| Fe1#2-S1-Na1-C62#3 | 21.37(2)     | Na1-Fe1-N11-C12    | 4.91(6)     |
| Fe1-S1-Na1-C62#3   | -158.63(2)   | C12-N11-C21-C31    | 178.10(9)   |
| Na1#2-S1-Na1-C62#3 | 84.98(2)     | Fe1-N11-C21-C31    | -0.64(13)   |
| Fe1#2-S1-Na1-C62   | -158.63(2)   | C12-N11-C21-C11    | -1.56(12)   |
| Fe1-S1-Na1-C62     | 21.37(2)     | Fe1-N11-C21-C11    | 179.70(7)   |
| Na1#2-S1-Na1-C62   | -95.02(2)    | N11-C21-C31-C21#1  | -4.92(19)   |
| Fe1#2-S1-Na1-C42   | 167.72(4)    | C11-C21-C31-C21#1  | 174.74(9)   |
| Fe1-S1-Na1-C42     | -12.29(4)    | N11-C21-C31-C61    | 174.10(10)  |
| Na1#2-S1-Na1-C42   | -128.68(4)   | C11-C21-C31-C61    | -6.24(15)   |
| Fe1#2-S1-Na1-C42#3 | -12.28(4)    | C21-N11-C12-C22    | -92.63(10)  |
| Fe1-S1-Na1-C42#3   | 167.71(4)    | Fe1-N11-C12-C22    | 86.31(9)    |
| Na1#2-S1-Na1-C42#3 | 51.33(4)     | C21-N11-C12-C62    | 90.45(10)   |
| Fe1#2-S1-Na1-C12   | 177.474(18)  | Fe1-N11-C12-C62    | -90.60(8)   |
| Fe1-S1-Na1-C12     | -2.527(18)   | C21-N11-C12-Na1    | 174.82(6)   |
| Na1#2-S1-Na1-C12   | -118.917(18) | Fe1-N11-C12-Na1    | -6.23(7)    |
| Fe1#2-S1-Na1-C12#3 | -2.526(18)   | S1-Na1-C12-C22     | -112.13(5)  |
| Fe1-S1-Na1-C12#3   | 177.473(18)  | C52#3-Na1-C12-C22  | 40.54(7)    |
| Na1#2-S1-Na1-C12#3 | 61.083(18)   | C52-Na1-C12-C22    | 94.79(6)    |

|                   |             |                   |             |
|-------------------|-------------|-------------------|-------------|
| C62#3-Na1-C12-C22 | 8.36(10)    | N11-C12-C22-Na1   | -112.34(7)  |
| C62-Na1-C12-C22   | 125.76(8)   | S1-Na1-C22-C32    | -163.28(6)  |
| C42-Na1-C12-C22   | 61.17(6)    | C52#3-Na1-C22-C32 | -22.28(7)   |
| C42#3-Na1-C12-C22 | 74.64(6)    | C52-Na1-C22-C32   | 62.25(6)    |
| C12#3-Na1-C12-C22 | -112.15(5)  | C62#3-Na1-C22-C32 | -48.41(7)   |
| C32-Na1-C12-C22   | 28.95(6)    | C62-Na1-C22-C32   | 96.48(7)    |
| C32#3-Na1-C12-C22 | 107.37(7)   | C42-Na1-C22-C32   | 28.59(6)    |
| C22#3-Na1-C12-C22 | 137.54(10)  | C42#3-Na1-C22-C32 | 7.17(7)     |
| S1-Na1-C12-C62    | 122.11(5)   | C12-Na1-C22-C32   | 126.87(9)   |
| C52#3-Na1-C12-C62 | -85.22(6)   | C12#3-Na1-C22-C32 | -55.15(10)  |
| C52-Na1-C12-C62   | -30.97(5)   | C32#3-Na1-C22-C32 | 27.21(9)    |
| C62#3-Na1-C12-C62 | -117.40(10) | C22#3-Na1-C22-C32 | 16.72(6)    |
| C42-Na1-C12-C62   | -64.59(6)   | S1-Na1-C22-C12    | 69.85(5)    |
| C42#3-Na1-C12-C62 | -51.12(6)   | C52#3-Na1-C22-C12 | -149.15(6)  |
| C12#3-Na1-C12-C62 | 122.08(5)   | C52-Na1-C22-C12   | -64.62(6)   |
| C32-Na1-C12-C62   | -96.81(6)   | C62#3-Na1-C22-C12 | -175.29(5)  |
| C32#3-Na1-C12-C62 | -18.40(7)   | C62-Na1-C22-C12   | -30.39(5)   |
| C22#3-Na1-C12-C62 | 11.78(10)   | C42-Na1-C22-C12   | -98.28(6)   |
| S1-Na1-C12-N11    | 6.26(6)     | C42#3-Na1-C22-C12 | -119.70(6)  |
| C52#3-Na1-C12-N11 | 158.93(6)   | C12#3-Na1-C22-C12 | 177.97(8)   |
| C52-Na1-C12-N11   | -146.82(7)  | C32-Na1-C22-C12   | -126.87(9)  |
| C62#3-Na1-C12-N11 | 126.75(8)   | C32#3-Na1-C22-C12 | -99.66(6)   |
| C62-Na1-C12-N11   | -115.85(9)  | C22#3-Na1-C22-C12 | -110.15(5)  |
| C42-Na1-C12-N11   | 179.56(7)   | S1-Na1-C22-C72    | -46.48(7)   |
| C42#3-Na1-C12-N11 | -166.97(6)  | C52#3-Na1-C22-C72 | 94.52(8)    |
| C12#3-Na1-C12-N11 | 6.24(6)     | C52-Na1-C22-C72   | 179.05(8)   |
| C32-Na1-C12-N11   | 147.34(8)   | C62#3-Na1-C22-C72 | 68.38(8)    |
| C32#3-Na1-C12-N11 | -134.24(6)  | C62-Na1-C22-C72   | -146.73(9)  |
| C22#3-Na1-C12-N11 | -104.07(9)  | C42-Na1-C22-C72   | 145.39(9)   |
| C62-C12-C22-C32   | 2.73(13)    | C42#3-Na1-C22-C72 | 123.97(7)   |
| N11-C12-C22-C32   | -174.16(8)  | C12-Na1-C22-C72   | -116.33(10) |
| Na1-C12-C22-C32   | -61.82(8)   | C12#3-Na1-C22-C72 | 61.64(11)   |
| C62-C12-C22-C72   | -176.65(8)  | C32-Na1-C22-C72   | 116.80(10)  |
| N11-C12-C22-C72   | 6.46(13)    | C32#3-Na1-C22-C72 | 144.00(7)   |
| Na1-C12-C22-C72   | 118.80(9)   | C22#3-Na1-C22-C72 | 133.52(7)   |
| C62-C12-C22-Na1   | 64.55(7)    | C12-C22-C32-C42   | -1.21(15)   |

|                   |            |                   |             |
|-------------------|------------|-------------------|-------------|
| C72-C22-C32-C42   | 178.18(9)  | C32#3-Na1-C42-C32 | 150.71(5)   |
| Na1-C22-C32-C42   | -61.72(9)  | C22#3-Na1-C42-C32 | 147.53(6)   |
| C12-C22-C32-Na1   | 60.51(8)   | S1-Na1-C42-C52    | 75.88(8)    |
| C72-C22-C32-Na1   | -120.10(9) | C52#3-Na1-C42-C52 | -131.33(6)  |
| S1-Na1-C32-C42    | 148.40(5)  | C62#3-Na1-C42-C52 | -138.05(6)  |
| C52#3-Na1-C32-C42 | -72.64(6)  | C62-Na1-C42-C52   | 30.25(6)    |
| C52-Na1-C32-C42   | 30.81(6)   | C42#3-Na1-C42-C52 | -104.12(8)  |
| C62#3-Na1-C32-C42 | -90.88(6)  | C12-Na1-C42-C52   | 64.11(6)    |
| C62-Na1-C32-C42   | 64.94(6)   | C12#3-Na1-C42-C52 | -116.03(6)  |
| C42#3-Na1-C32-C42 | -45.20(7)  | C32-Na1-C42-C52   | 124.99(9)   |
| C12-Na1-C32-C42   | 98.77(7)   | C32#3-Na1-C42-C52 | -84.30(6)   |
| C12#3-Na1-C32-C42 | -82.07(7)  | C22#3-Na1-C42-C52 | -87.48(6)   |
| C32#3-Na1-C32-C42 | -31.60(5)  | C32-C42-C52-C62   | 0.51(16)    |
| C22#3-Na1-C32-C42 | -44.18(7)  | Na1-C42-C52-C62   | -67.76(9)   |
| S1-Na1-C32-C22    | 20.14(7)   | C32-C42-C52-Na1   | 68.27(9)    |
| C52#3-Na1-C32-C22 | 159.09(7)  | S1-Na1-C52-C42    | -132.20(5)  |
| C52-Na1-C32-C22   | -97.45(7)  | C52#3-Na1-C52-C42 | 47.80(5)    |
| C62#3-Na1-C32-C22 | 140.86(6)  | C62#3-Na1-C52-C42 | 51.47(7)    |
| C62-Na1-C32-C22   | -63.32(6)  | C62-Na1-C52-C42   | -125.72(10) |
| C42-Na1-C32-C22   | -128.26(9) | C42#3-Na1-C52-C42 | 68.24(8)    |
| C42#3-Na1-C32-C22 | -173.46(6) | C12-Na1-C52-C42   | -94.96(7)   |
| C12-Na1-C32-C22   | -29.49(5)  | C12#3-Na1-C52-C42 | 85.64(7)    |
| C12#3-Na1-C32-C22 | 149.67(6)  | C32-Na1-C52-C42   | -29.82(6)   |
| C32#3-Na1-C32-C22 | -159.86(7) | C32#3-Na1-C52-C42 | 94.15(7)    |
| C22#3-Na1-C32-C22 | -172.44(3) | C22#3-Na1-C52-C42 | 103.88(7)   |
| C22-C32-C42-C52   | -0.41(16)  | S1-Na1-C52-C62    | -6.48(7)    |
| Na1-C32-C42-C52   | -64.74(9)  | C52#3-Na1-C52-C62 | 173.52(7)   |
| C22-C32-C42-Na1   | 64.33(9)   | C62#3-Na1-C52-C62 | 177.19(3)   |
| S1-Na1-C42-C32    | -49.11(8)  | C42-Na1-C52-C62   | 125.72(10)  |
| C52#3-Na1-C42-C32 | 103.68(6)  | C42#3-Na1-C52-C62 | -166.03(7)  |
| C52-Na1-C42-C32   | -124.99(9) | C12-Na1-C52-C62   | 30.76(5)    |
| C62#3-Na1-C42-C32 | 96.96(6)   | C12#3-Na1-C52-C62 | -148.64(6)  |
| C62-Na1-C42-C32   | -94.74(6)  | C32-Na1-C52-C62   | 95.90(7)    |
| C42#3-Na1-C42-C32 | 130.89(8)  | C32#3-Na1-C52-C62 | -140.13(7)  |
| C12-Na1-C42-C32   | -60.88(6)  | C22#3-Na1-C52-C62 | -130.40(6)  |
| C12#3-Na1-C42-C32 | 118.98(6)  | C42-C52-C62-C12   | 1.00(14)    |

|                   |            |                    |             |
|-------------------|------------|--------------------|-------------|
| Na1-C52-C62-C12   | -67.52(8)  | C32-Na1-C62-C12    | 61.73(6)    |
| C42-C52-C62-C102  | -178.84(9) | C32#3-Na1-C62-C12  | 166.16(5)   |
| Na1-C52-C62-C102  | 112.64(9)  | C22#3-Na1-C62-C12  | -173.52(5)  |
| C42-C52-C62-Na1   | 68.52(9)   | S1-Na1-C62-C102    | 57.88(7)    |
| C22-C12-C62-C52   | -2.63(13)  | C52#3-Na1-C62-C102 | -124.95(6)  |
| N11-C12-C62-C52   | 174.26(8)  | C52-Na1-C62-C102   | -117.13(10) |
| Na1-C12-C62-C52   | 65.41(8)   | C62#3-Na1-C62-C102 | -122.12(7)  |
| C22-C12-C62-C102  | 177.21(8)  | C42-Na1-C62-C102   | -147.01(8)  |
| N11-C12-C62-C102  | -5.90(13)  | C42#3-Na1-C62-C102 | -102.94(7)  |
| Na1-C12-C62-C102  | -114.75(9) | C12-Na1-C62-C102   | 118.61(9)   |
| C22-C12-C62-Na1   | -68.04(8)  | C12#3-Na1-C62-C102 | -59.57(10)  |
| N11-C12-C62-Na1   | 108.85(7)  | C32-Na1-C62-C102   | -179.66(8)  |
| S1-Na1-C62-C52    | 175.01(6)  | C32#3-Na1-C62-C102 | -75.23(7)   |
| C52#3-Na1-C62-C52 | -7.81(9)   | C22#3-Na1-C62-C102 | -54.91(8)   |
| C62#3-Na1-C62-C52 | -4.99(6)   | C32-C22-C72-C82    | 68.63(13)   |
| C42-Na1-C62-C52   | -29.87(6)  | C12-C22-C72-C82    | -112.00(11) |
| C42#3-Na1-C62-C52 | 14.20(7)   | Na1-C22-C72-C82    | -23.08(12)  |
| C12-Na1-C62-C52   | -124.25(9) | C32-C22-C72-C92    | -54.75(13)  |
| C12#3-Na1-C62-C52 | 57.56(10)  | C12-C22-C72-C92    | 124.62(11)  |
| C32-Na1-C62-C52   | -62.53(6)  | Na1-C22-C72-C92    | -146.46(8)  |
| C32#3-Na1-C62-C52 | 41.91(7)   | C52-C62-C102-C122  | 50.38(13)   |
| C22#3-Na1-C62-C52 | 62.23(7)   | C12-C62-C102-C122  | -129.46(9)  |
| S1-Na1-C62-C12    | -60.73(5)  | Na1-C62-C102-C122  | 138.05(7)   |
| C52#3-Na1-C62-C12 | 116.44(5)  | C52-C62-C102-C112  | -74.07(12)  |
| C52-Na1-C62-C12   | 124.25(9)  | C12-C62-C102-C112  | 106.09(10)  |
| C62#3-Na1-C62-C12 | 119.27(5)  | Na1-C62-C102-C112  | 13.61(10)   |
| C42-Na1-C62-C12   | 94.38(6)   | C14-C24-C34-C44    | -178.7(10)  |
| C42#3-Na1-C62-C12 | 138.45(5)  | C24-C34-C44-C54    | -174.4(12)  |
| C12#3-Na1-C62-C12 | -178.19(7) |                    |             |

---

Symmetry transformations used to generate equivalent atoms:

#1 x,-y,z    #2 -x+2,-y,-z    #3 -x+2,y,-z
